# Supplementary material for: Co-catalyzed ortho-C–H functionalization/annulation of arenes and alkenes with alkynylsilanes: access to isoquinolone and pyridone motifs
Source: Royal Society of Chemistry journal article supplement (doi:10.1039/c9ra06963a), 2019-01-01

## Electronic Supplementary Information

### Co-Catalyzed *ortho*-C-H Functionalization/ Annulation of Arenes and Alkenes with Alkynylsilanes: Access to Isoquinolone and Pyridone Motifs

Cong Lin, <sup>\*a,b</sup> and Liang Shen<sup>\*a,b</sup>

<sup>a</sup> *College of Chemistry and Chemical Engineering, Jiangxi Science & Technology*

*Normal University, Nanchang 330013, China*

<sup>b</sup> *College of Chemistry and Chemical Engineering, Jiangxi Engineering Laboratory of Waterborne Coatings, Jiangxi Science & Technology Normal University, Nanchang 330013, China*

**E-mail:** [conglin0127@jxstnu.com.cn](mailto:conglin0127@jxstnu.com.cn)

#### Table of Contents

|                                                                           |     |
|---------------------------------------------------------------------------|-----|
| General Information.....                                                  | S2  |
| Optimization of Reaction Conditions <sup>a</sup> .....                    | S3  |
| Typical Procedure for the Synthesis of Isoquinolones.....                 | S4  |
| Typical Procedure for the Synthesis of Trimethylsilane Isoquinolones..... | S4  |
| Analytical Data for Products.....                                         | S5  |
| Gram-Scale Synthesis of 3a and 7a.....                                    | S26 |
| The H/D Exchange Experiments.....                                         | S27 |
| The Kinetic Isotope Experiments.....                                      | S28 |
| References.....                                                           | S30 |
| Copies of <sup>1</sup> H and <sup>13</sup> C NMR Spectra.....             | S31 |

## General Information

All reactions were performed under O<sub>2</sub> atmosphere in a 25 mL sealed tube. The materials and solvents were purchased from common commercial sources and used without additional purification, if there is no special version. Starting materials were synthesized according to literature procedures.<sup>1-7</sup> <sup>1</sup>H NMR spectra were recorded at 400 MHz using TMS as internal standard, <sup>13</sup>C NMR spectra was recorded at 100 MHz using TMS as internal standard. The multiplicities are reported as follows: singlet (s), doublet (d), doublet of doublets (dd), multiplet (m), and andtriplet (t). Mass spectroscopy data of the products were collected on an HRMS-TOF instrument.

## Optimization of Reaction Conditions<sup>a</sup>

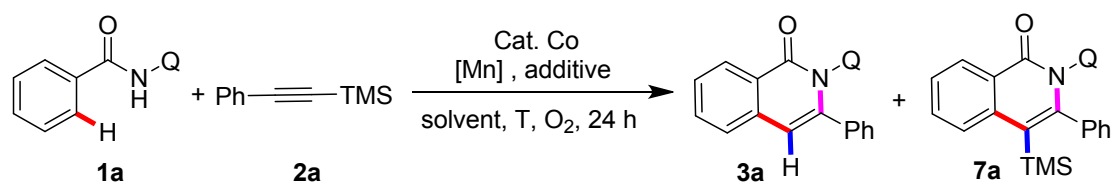

| Entry           | Cat. Co                                    | [Mn]                                    | additive           | solvent           | T(°C)      | <b>3a<sup>b</sup></b> | <b>7a<sup>b</sup></b> |
|-----------------|--------------------------------------------|-----------------------------------------|--------------------|-------------------|------------|-----------------------|-----------------------|
| 1               | Co(OAc) <sub>2</sub>                       | Mn(OAc) <sub>2</sub>                    | CsF                | TFE               | 100        | 85%                   | <5%                   |
| 2               | CoCl <sub>2</sub>                          | Mn(OAc) <sub>2</sub>                    | CsF                | TFE               | 100        | 63%                   | <5%                   |
| 3               | CoI <sub>2</sub>                           | Mn(OAc) <sub>2</sub>                    | CsF                | TFE               | 100        | 30%                   | 15%                   |
| 4               | CoBr <sub>2</sub>                          | Mn(OAc) <sub>2</sub>                    | CsF                | TFE               | 100        | 34%                   | 11%                   |
| <b>5</b>        | <b>Co(OAc)<sub>2</sub>·4H<sub>2</sub>O</b> | <b>Mn(OAc)<sub>2</sub></b>              | <b>CsF</b>         | <b>TFE</b>        | <b>100</b> | <b>96%</b>            | <b>trace</b>          |
| 6               | Co(acac) <sub>2</sub>                      | Mn(OAc) <sub>2</sub>                    | CsF                | TFE               | 100        | 55%                   | 26%                   |
| 7               | Co(acac) <sub>3</sub>                      | Mn(OAc) <sub>2</sub>                    | CsF                | TFE               | 100        | 57%                   | 20%                   |
| 8               | -                                          | Mn(OAc) <sub>2</sub>                    | CsF                | TFE               | 100        | 0                     | 0                     |
| 9               | Co(OAc) <sub>2</sub> ·4H <sub>2</sub> O    | Mn(OAc) <sub>2</sub>                    | CsF, NaOAc(2.0)    | TFE               | 100        | 73%                   | 15%                   |
| 10              | Co(OAc) <sub>2</sub> ·4H <sub>2</sub> O    | Mn(OAc) <sub>2</sub>                    | CsF(2.0)           | TFE               | 100        | 83%                   | trace                 |
| 11              | Co(OAc) <sub>2</sub> ·4H <sub>2</sub> O    | Mn(OAc) <sub>2</sub>                    | CsF(4.0)           | TFE               | 100        | 77%                   | trace                 |
| 12              | Co(OAc) <sub>2</sub> ·4H <sub>2</sub> O    | Mn(OAc) <sub>2</sub>                    | KF                 | TFE               | 100        | 75%                   | 10%                   |
| 13              | Co(OAc) <sub>2</sub> ·4H <sub>2</sub> O    | Mn(OAc) <sub>2</sub>                    | LiF                | TFE               | 100        | 22%                   | trace                 |
| 14              | Co(OAc) <sub>2</sub> ·4H <sub>2</sub> O    | Mn(OAc) <sub>2</sub>                    | NaF                | TFE               | 100        | 21%                   | trace                 |
| 15              | Co(OAc) <sub>2</sub> ·4H <sub>2</sub> O    | Mn(OAc) <sub>2</sub>                    | -                  | TFE               | 100        | 33%                   | 21%                   |
| 16 <sup>c</sup> | Co(OAc) <sub>2</sub> ·4H <sub>2</sub> O    | Mn(OAc) <sub>2</sub>                    | CsF                | TFE               | 100        | 0                     | 0                     |
| 17 <sup>d</sup> | Co(OAc) <sub>2</sub> ·4H <sub>2</sub> O    | Mn(OAc) <sub>2</sub>                    | CsF                | TFE               | 100        | 21%                   | <10%                  |
| 18              | Co(OAc) <sub>2</sub> ·4H <sub>2</sub> O    | Mn(OAc) <sub>2</sub>                    | CsF                | TFE               | 80         | trace                 | trace                 |
| 19              | Co(OAc) <sub>2</sub> ·4H <sub>2</sub> O    | Mn(OAc) <sub>2</sub>                    | CsF                | TFE               | 90         | 66%                   | 15%                   |
| 20              | Co(OAc) <sub>2</sub> ·4H <sub>2</sub> O    | Mn(OAc) <sub>2</sub>                    | CsF                | TFE               | 110        | 72%                   | <10%                  |
| 21              | Co(OAc) <sub>2</sub> ·4H <sub>2</sub> O    | Mn(OAc) <sub>2</sub>                    | CsF                | DCE               | 100        | 0                     | 0                     |
| 22              | Co(OAc) <sub>2</sub> ·4H <sub>2</sub> O    | Mn(OAc) <sub>2</sub>                    | CsF                | HFIP              | 100        | 0                     | 0                     |
| 23              | Co(OAc) <sub>2</sub> ·4H <sub>2</sub> O    | Mn(OAc) <sub>2</sub>                    | CsF                | DMF               | 100        | 0                     | 0                     |
| 24              | Co(OAc) <sub>2</sub> ·4H <sub>2</sub> O    | Mn(OAc) <sub>2</sub>                    | CsF                | Dioxane           | 100        | 0                     | 0                     |
| 25              | Co(OAc) <sub>2</sub> ·4H <sub>2</sub> O    | Mn(OAc) <sub>2</sub>                    | CsF                | PhCF <sub>3</sub> | 100        | 0                     | 0                     |
| 26              | Co(OAc) <sub>2</sub> ·4H <sub>2</sub> O    | Mn(OAc) <sub>2</sub> ·4H <sub>2</sub> O | CsF                | TFE               | 100        | 83%                   | trace                 |
| 27              | Co(OAc) <sub>2</sub> ·4H <sub>2</sub> O    | Mn(OAc) <sub>3</sub> ·2H <sub>2</sub> O | CsF                | TFE               | 100        | 56%                   | 11%                   |
| 28              | Co(OAc) <sub>2</sub> ·4H <sub>2</sub> O    | Mn(acac) <sub>2</sub>                   | CsF                | TFE               | 100        | 23%                   | 39%                   |
| 29              | Co(OAc) <sub>2</sub> ·4H <sub>2</sub> O    | Mn(acac) <sub>3</sub>                   | CsF                | TFE               | 100        | 18%                   | 56%                   |
| 30              | Co(OAc) <sub>2</sub> ·4H <sub>2</sub> O    | -                                       | CsF                | TFE               | 100        | trace                 | trace                 |
| <b>31</b>       | <b>Co(acac)<sub>2</sub></b>                | <b>Mn(acac)<sub>3</sub></b>             | <b>NaOAc (0.2)</b> | <b>TFE</b>        | <b>100</b> | <b>&lt;5</b>          | <b>76</b>             |
| 32              | Co(acac) <sub>3</sub>                      | Mn(acac) <sub>3</sub>                   | NaOAc (0.2)        | TFE               | 100        | trace                 | trace                 |

<sup>a</sup> Reactions were carried out by using **1a** (0.1 mmol), **2a** (0.3 mmol), Cat. Co (0.02 mmol), [Mn] (0.2 mmol), additive (0.12 mmol), solvent (1.0 ml), T, O<sub>2</sub>, 24 h. <sup>b</sup> Isolated yield. <sup>c</sup> N<sub>2</sub>. <sup>d</sup> air.

## Typical Procedure for the Synthesis of Isoquinolones

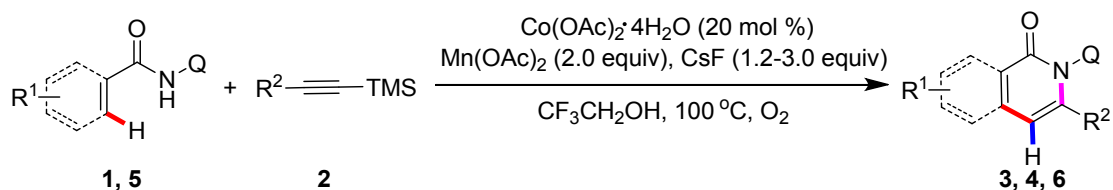

A 25 mL sealed tube was charged with amide **1, 5** (0.1 mmol), alkynylsilanes **2** (0.3 mmol),  $\text{Co(OAc)}_2 \cdot 4\text{H}_2\text{O}$  (5 mg, 0.02 mmol),  $\text{Mn(OAc)}_2$  (34.6 mg, 0.2 mmol),  $\text{CsF}$  (18.2-45.6 mg, 0.12-0.3 mmol) and  $\text{CF}_3\text{CH}_2\text{OH}$  (1.0 mL). The vial was evacuated and filled with  $\text{O}_2$  atmosphere for five times, and stirred at  $100\text{ }^\circ\text{C}$  or  $120\text{ }^\circ\text{C}$  for 24 h. The mixture was then cooled to room temperature, diluted with EtOAc, filtered through a celite pad, and concentrated in vacuo. The residue was purified by flash column chromatography on silica gel, eluting with EtOAc/hexane (1:5 ~ 1:2, v/v), to afford the desired products **3, 4** and **6**.

## Typical Procedure for the Synthesis of Trimethylsilane Isoquinolones

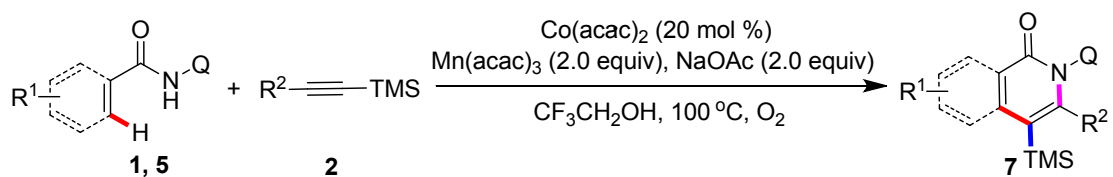

A 25 mL sealed tube was charged with amide **1, 5** (0.1 mmol), alkynylsilanes **2** (0.3 mmol),  $\text{Co(acac)}_2$  (5.2 mg, 0.02 mmol),  $\text{Mn(acac)}_3$  (70.4 mg, 0.2 mmol),  $\text{NaOAc}$  (16.4 mg, 0.2 mmol) and  $\text{CF}_3\text{CH}_2\text{OH}$  (1.0 mL). The vial was evacuated and filled with  $\text{O}_2$  atmosphere for five times, and stirred at  $100\text{ }^\circ\text{C}$  for 24 h. The mixture was then cooled to room temperature, diluted with EtOAc, filtered through a celite pad, and concentrated in vacuo. The residue was purified by flash column chromatography on silica gel, eluting with EtOAc/hexane (1:5 ~ 1:2, v/v), to afford the desired products **7**.

## Analytical Data for Products

### 3-phenyl-2-(quinolin-8-yl)isoquinolin-1(2H)-one (3a)

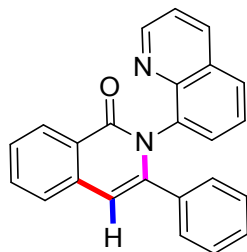

Rf 0.24 (hexane/EtOAc = 2/1). 96%, 33.4 mg. White solid;  $^1\text{H}$  NMR ( $\text{CDCl}_3$ , 400 MHz)  $\delta$  8.91 (dd,  $J_1 = 1.6$  Hz;  $J_2 = 4.0$  Hz, 1H), 8.47 (d,  $J = 8.0$  Hz, 1H), 8.09 (dd,  $J_1 = 1.6$  Hz;  $J_2 = 8.4$  Hz, 1H), 7.68-7.30 (m, 2H), 7.61 (d,  $J = 7.6$  Hz, 1H), 7.48-7.53 (m, 2H), 7.41 (t,  $J = 8.0$  Hz, 1H), 7.37 (dd,  $J_1 = 4.0$  Hz;  $J_2 = 8.0$  Hz, 1H), 7.09-7.12 (m, 2H), 7.00-7.04 (m, 1H), 6.95 (t,  $J = 7.2$  Hz, 2H), 6.66 (s, 1H).  $^{13}\text{C}$  NMR ( $\text{CDCl}_3$ , 100 MHz)  $\delta$  163.3, 151.0, 144.7, 144.5, 137.3, 137.3, 136.3, 136.2, 132.7, 130.8, 128.8, 128.7, 128.5, 128.0, 127.4, 126.8, 126.2, 125.9, 125.5, 121.6, 107.6. HRMS (EI-TOF) calcd for  $\text{C}_{24}\text{H}_{16}\text{N}_2\text{O}$  ( $\text{M}^+$ ):348.1263, found:348.1263.

### 3-(4-bromophenyl)-2-(quinolin-8-yl)isoquinolin-1(2H)-one (3b)

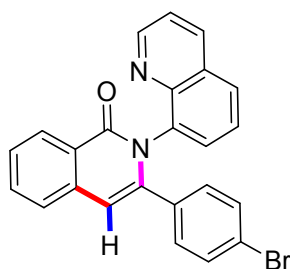

Rf 0.24 (hexane/EtOAc = 2/1). 58%, 24.7 mg. White solid;  $^1\text{H}$  NMR ( $\text{CDCl}_3$ , 400 MHz)  $\delta$  8.89 (dd,  $J_1 = 1.6$  Hz;  $J_2 = 4.0$  Hz, 1H), 8.46 (d,  $J = 8.0$  Hz, 1H), 8.12 (dd,  $J_1 = 1.6$  Hz;  $J_2 = 8.4$  Hz, 1H), 7.77 (dd,  $J_1 = 1.2$  Hz;  $J_2 = 8.0$  Hz, 1H), 7.69-7.73 (m, 1H), 7.60 (d,  $J = 7.6$  Hz, 1H), 7.50-7.54 (m, 2H), 7.46 (t,  $J = 7.6$  Hz, 1H), 7.39 (dd,  $J_1 = 4.4$  Hz;  $J_2 = 8.4$  Hz, 1H), 7.09 (d,  $J = 7.6$  Hz, 2H), 7.00 (d,  $J = 8.8$  Hz, 2H), 6.62 (s, 1H).  $^{13}\text{C}$  NMR ( $\text{CDCl}_3$ , 100 MHz)  $\delta$  163.2, 151.0, 144.6, 143.3, 137.1, 137.0, 136.3, 135.3, 132.8, 130.8, 130.6, 130.4, 129.0, 128.9, 128.5, 127.0, 126.2, 126.0, 125.6, 122.3, 121.7, 107.7. HRMS (EI-TOF) calcd for  $\text{C}_{24}\text{H}_{15}\text{BrN}_2\text{O}$  ( $\text{M}^+$ ):426.0368,

found:426.0366

**3-(pyridin-2-yl)-2-(quinolin-8-yl)isoquinolin-1(2H)-one (3c)**

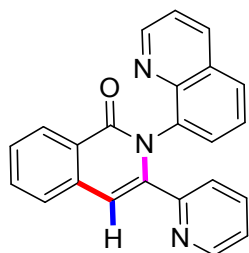

Rf 0.24 (hexane/EtOAc = 10/1). 91%, 31.8 mg. White solid;  $^1\text{H}$  NMR ( $\text{CDCl}_3$ , 400 MHz)  $\delta$  8.90-8.91 (m, 1H), 8.49 (d,  $J = 8.0$  Hz, 1H), 8.31 (d,  $J = 4.4$  Hz, 1H), 8.11 (d,  $J = 8.4$  Hz, 1H), 7.70-7.75 (m, 2H), 7.65 (d,  $J = 9.6$  Hz, 2H), 7.52-7.56 (m, 1H), 7.45 (t,  $J = 8.0$  Hz, 1H), 7.37 (dd,  $J_1 = 4.0$  Hz;  $J_2 = 8.0$  Hz, 1H), 7.20-7.24 (m, 1H), 7.08 (d,  $J = 7.6$  Hz, 1H), 6.93 (dd,  $J_1 = 5.2$  Hz;  $J_2 = 7.2$  Hz, 1H), 6.86 (s, 1H).  $^{13}\text{C}$  NMR ( $\text{CDCl}_3$ , 100 MHz)  $\delta$  163.2, 154.2, 150.9, 148.5, 144.5, 142.9, 137.0, 136.9, 136.3, 135.6, 132.8, 131.1, 128.7, 128.5, 127.2, 126.6, 126.0, 123.9, 122.6, 121.5, 108.4. HRMS (EI-TOF) calcd for  $\text{C}_{23}\text{H}_{15}\text{N}_3\text{O}$  ( $\text{M}^+$ ): 349.1215, found: 349.1211.

**3-cyclohexyl-2-(quinolin-8-yl)isoquinolin-1(2H)-one (3d)**

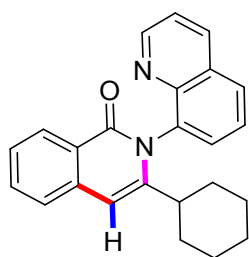

Rf 0.24 (hexane/EtOAc = 10/1). 98%, 34.7 mg. White solid;  $^1\text{H}$  NMR ( $\text{CDCl}_3$ , 400 MHz)  $\delta$  8.88 (dd,  $J_1 = 1.6$  Hz;  $J_2 = 4.0$  Hz, 1H), 8.39 (d,  $J = 8.0$  Hz, 1H), 8.24 (dd,  $J_1 = 2.0$  Hz;  $J_2 = 8.0$  Hz, 1H), 7.95 (dd,  $J_1 = 1.6$  Hz;  $J_2 = 8.0$  Hz, 1H), 7.70-7.75 (m, 2H), 7.61-7.68 (m, 1H), 7.52 (d,  $J = 8.0$  Hz, 1H), 7.40-7.45 (m, 2H), 6.43 (s, 1H), 1.16-1.26 (m, 5H), 0.84-0.96 (m, 2H), 0.64-0.71 (m, 1H), 0.56-0.63 (m, 1H), 0.45-0.51 (m, 1H), 0.27-0.34 (m, 1H).  $^{13}\text{C}$  NMR ( $\text{CDCl}_3$ , 100 MHz)  $\delta$  163.7, 151.3, 145.2, 144.7, 137.6, 137.1, 136.3, 132.5, 130.3, 129.3, 129.0, 128.3, 126.3, 126.1, 125.7, 125.2, 121.7, 103.2, 31.5, 30.2, 29.7. HRMS (EI-TOF) calcd for  $\text{C}_{24}\text{H}_{22}\text{N}_3\text{O}$  ( $\text{M}^+$ ): 354.1732, found:

354.1735.

**3-methyl-2-(quinolin-8-yl)isoquinolin-1(2H)-one (3e)**

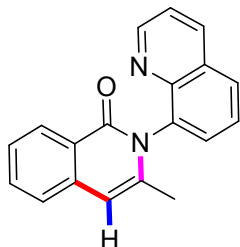

Rf 0.24 (hexane/EtOAc = 10/1). 56%, 16.0 mg. White solid;  $^1\text{H}$  NMR ( $\text{CDCl}_3$ , 400 MHz)  $\delta$  8.89 (dd,  $J_1 = 1.6$  Hz;  $J_2 = 4.4$  Hz, 1H), 8.38 (d,  $J = 8.0$  Hz, 1H), 8.24 (dd,  $J_1 = 1.6$  Hz;  $J_2 = 5.2$  Hz, 1H), 7.97 (dd,  $J_1 = 2.4$  Hz;  $J_2 = 6.4$  Hz, 1H), 7.62-7.76 (m, 3H), 7.51-7.55 (m, 1H), 7.44 (dd,  $J_1 = 4.0$  Hz;  $J_2 = 8.4$  Hz, 2H), 6.54 (s, 1H), 1.93 (s, 3H).  $^{13}\text{C}$  NMR ( $\text{CDCl}_3$ , 100 MHz)  $\delta$  161.8, 149.5, 134.4, 130.5, 130.3, 128.0, 127.2, 127.1, 126.3, 125.1, 124.4, 124.4, 123.9, 123.3, 120.9, 119.9, 119.7, 103.5, 19.1. HRMS (EI-TOF) calcd for  $\text{C}_{19}\text{H}_{14}\text{N}_2\text{O}$  ( $\text{M}^+$ ): 286.1106, found: 286.1100.

**2-(quinolin-8-yl)-3-(trimethylsilyl)isoquinolin-1(2H)-one (3f)**

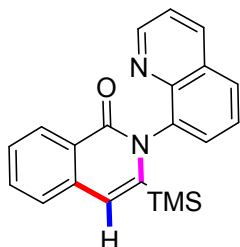

Rf 0.24 (hexane/EtOAc = 10/1). 64%, 22.0 mg. White solid;  $^1\text{H}$  NMR ( $\text{CDCl}_3$ , 400 MHz)  $\delta$  8.88 (dd,  $J_1 = 1.6$  Hz;  $J_2 = 4.0$  Hz, 1H), 8.42 (d,  $J = 8.0$  Hz, 1H), 8.22 (dd,  $J_1 = 1.6$  Hz;  $J_2 = 8.4$  Hz, 1H), 7.97 (dd,  $J_1 = 1.6$  Hz;  $J_2 = 8.0$  Hz, 1H), 7.65-7.73 (m, 3H), 7.59 (d,  $J = 8.0$  Hz, 1H), 7.49-7.53 (m, 1H), 7.42 (dd,  $J_1 = 4.0$  Hz;  $J_2 = 8.0$  Hz, 1H), 6.91 (s, 1H), -0.27 (s, 9H).  $^{13}\text{C}$  NMR ( $\text{CDCl}_3$ , 100 MHz)  $\delta$  163.9, 151.5, 147.0, 145.7, 139.5, 137.1, 136.4, 132.6, 130.7, 129.7, 129.4, 128.2, 127.5, 126.6, 126.4, 126.2, 122.1, 115.7, 0.02. HRMS (EI-TOF) calcd for  $\text{C}_{21}\text{H}_{20}\text{N}_2\text{OSi}$  ( $\text{M}^+$ ): 344.1345, found: 344.1345.

**8-methyl-3-phenyl-2-(quinolin-8-yl)isoquinolin-1(2H)-one (4a)**

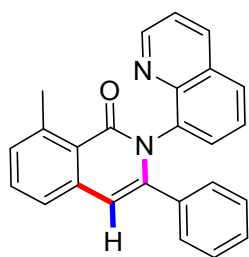

Rf 0.39 (hexane/EtOAc = 5/1). 80%, 29.0 mg. White solid;  $^1\text{H}$  NMR ( $\text{CDCl}_3$ , 400 MHz)  $\delta$  8.91 (dd,  $J_1 = 1.6$  Hz;  $J_2 = 4.0$  Hz, 1H), 8.07 (dd,  $J_1 = 1.6$  Hz;  $J_2 = 8.0$  Hz, 1H), 7.70 (dd,  $J_1 = 1.2$  Hz;  $J_2 = 8.0$  Hz, 1H), 7.50-7.54 (m, 2H), 7.40-7.44 (m, 2H), 7.35 (dd,  $J_1 = 4.0$  Hz;  $J_2 = 8.0$  Hz, 1H), 7.24-7.26 (m, 1H), 7.09-7.11 (m, 2H), 6.98-7.00 (m, 1H), 6.91-6.95 (m, 2H), 6.58 (s, 1H), 2.90 (s, 3H).  $^{13}\text{C}$  NMR ( $\text{CDCl}_3$ , 100 MHz)  $\delta$  164.1, 150.9, 144.9, 144.3, 142.5, 139.1, 137.8, 136.3, 136.1, 132.0, 130.9, 129.9, 128.9, 128.7, 128.5, 127.9, 127.3, 125.9, 124.6, 123.9, 121.6, 107.9, 24.0. HRMS (EI-TOF) calcd for  $\text{C}_{25}\text{H}_{18}\text{N}_2\text{O}$  ( $\text{M}^+$ ): 362.1419, found: 362.1413.

**7-methyl-3-phenyl-2-(quinolin-8-yl)isoquinolin-1(2H)-one (4b)**

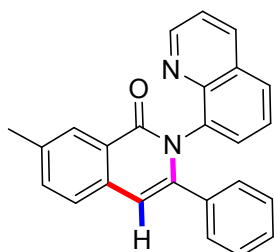

Rf 0.39 (hexane/EtOAc = 5/1). 61%, 22.1 mg. White solid;  $^1\text{H}$  NMR ( $\text{CDCl}_3$ , 400 MHz)  $\delta$  8.90 (dd,  $J_1 = 1.6$  Hz;  $J_2 = 4.0$  Hz, 1H), 8.27 (s, 1H), 8.08 (dd,  $J_1 = 1.6$  Hz;  $J_2 = 8.0$  Hz, 1H), 7.70-7.72 (m, 1H), 7.51 (s, 2H), 7.42-7.49 (m, 1H), 7.40 (d,  $J = 8.0$  Hz, 1H), 7.35 (dd,  $J_1 = 4.0$  Hz;  $J_2 = 8.0$  Hz, 1H), 7.08-7.12 (m, 2H), 6.99-7.03 (m, 1H), 6.93 (t,  $J = 7.2$  Hz, 2H), 6.62 (s, 1H), 2.50 (s, 3H).  $^{13}\text{C}$  NMR ( $\text{CDCl}_3$ , 100 MHz)  $\delta$  161.0, 148.7, 148.7, 142.6, 141.3, 135.2, 134.5, 134.2, 133.9, 132.7, 131.9, 128.5, 126.6, 126.4, 125.8, 125.6, 125.0, 123.9, 123.6, 123.2, 119.3, 105.2, 19.4. HRMS (EI-TOF) calcd for  $\text{C}_{25}\text{H}_{18}\text{N}_2\text{O}$  ( $\text{M}^+$ ): 362.1419, found: 362.1412.

**6-methyl-3-phenyl-2-(quinolin-8-yl)isoquinolin-1(2H)-one (4c)**



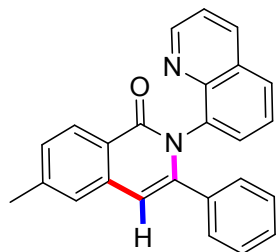

Rf 0.26 (hexane/EtOAc = 5/1). 69%, 25.0 mg. Yellow solid;  $^1\text{H}$  NMR ( $\text{CDCl}_3$ , 400 MHz)  $\delta$  8.91 (dd,  $J_1 = 1.6$  Hz;  $J_2 = 4.0$  Hz, 1H), 8.36 (d,  $J = 8.0$  Hz, 1H), 8.09 (dd,  $J_1 = 1.6$  Hz;  $J_2 = 8.4$  Hz, 1H), 7.71 (dd,  $J_1 = 1.2$  Hz;  $J_2 = 8.0$  Hz, 1H), 7.45-7.49 (m, 1H), 7.38-7.43 (m, 2H), 7.32-7.37 (m, 2H), 7.10 (d,  $J = 7.2$  Hz, 2H), 7.00-7.03 (m, 1H), 6.92-6.96 (m, 2H), 6.58 (s, 1H), 2.52 (s, 3H).  $^{13}\text{C}$  NMR ( $\text{CDCl}_3$ , 100 MHz)  $\delta$  163.3, 150.9, 144.8, 144.5, 143.2, 137.4, 136.4, 136.1, 130.8, 128.8, 128.6, 128.4, 128.4, 127.9, 127.3, 126.7, 126.2, 125.9, 125.8, 123.3, 121.5, 107.4, 21.9. HRMS (EI-TOF) calcd for  $\text{C}_{25}\text{H}_{18}\text{N}_2\text{O}$  ( $\text{M}^+$ ): 362.1419, found: 362.1419.

**6-methoxy-3-phenyl-2-(quinolin-8-yl)isoquinolin-1(2H)-one (4d)**

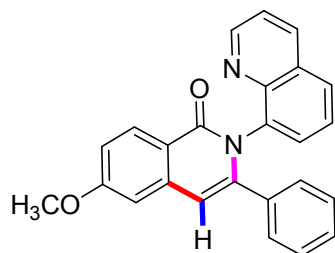

Rf 0.15 (hexane/EtOAc = 10/1). 84%, 31.8 mg. White solid;  $^1\text{H}$  NMR ( $\text{CDCl}_3$ , 400 MHz)  $\delta$  8.91 (dd,  $J_1 = 1.6$  Hz;  $J_2 = 4.4$  Hz, 1H), 8.38 (d,  $J = 8.8$  Hz, 1H), 8.07 (dd,  $J_1 = 1.6$  Hz;  $J_2 = 4.4$  Hz, 1H), 7.70 (dd,  $J_1 = 1.2$  Hz;  $J_2 = 8.4$  Hz, 1H), 7.48 (dd,  $J_1 = 1.6$  Hz;  $J_2 = 7.2$  Hz, 1H), 7.34-7.42 (m, 2H), 7.06-7.11 (m, 3H), 7.01 (t,  $J = 7.6$  Hz, 1H), 6.92-6.96 (m, 3H), 6.57 (s, 1H), 3.93 (s, 3H).  $^{13}\text{C}$  NMR ( $\text{CDCl}_3$ , 100 MHz)  $\delta$  163.2, 163.0, 150.9, 145.1, 144.8, 139.3, 137.3, 136.4, 136.2, 130.9, 130.6, 128.8, 128.8, 128.7, 128.0, 127.3, 125.8, 121.5, 119.3, 116.2, 107.4, 107.0, 55.6. HRMS (EI-TOF) calcd for  $\text{C}_{25}\text{H}_{18}\text{N}_2\text{O}_2$  ( $\text{M}^+$ ): 378.1368, found: 378.1365.

**6-(tert-butyl)-3-phenyl-2-(quinolin-8-yl)isoquinolin-1(2H)-one (4e)**

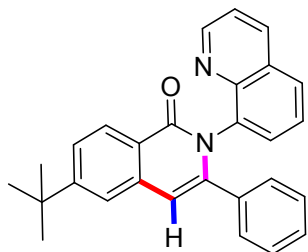

Rf 0.12 (hexane/EtOAc = 10/1). 46%, 18.6 mg. White solid;  $^1\text{H}$  NMR ( $\text{CDCl}_3$ , 400 MHz)  $\delta$  8.89 (dd,  $J_1 = 1.6$  Hz;  $J_2 = 4.0$  Hz, 1H), 8.40 (d,  $J = 7.6$  Hz, 1H), 8.08 (dd,  $J_1 = 1.6$  Hz;  $J_2 = 8.4$  Hz, 1H), 7.71 (dd,  $J_1 = 1.6$  Hz;  $J_2 = 8.0$  Hz, 1H), 7.57-7.59 (m, 2H), 7.45-7.50 (m, 1H), 7.39-7.43 (m, 1H), 7.36 (dd,  $J_1 = 4.0$  Hz;  $J_2 = 8.4$  Hz, 1H), 7.09-7.11 (m, 2H), 7.01 (d,  $J = 7.6$  Hz, 1H), 6.92-6.96 (m, 2H), 6.95 (s, 1H), 1.42 (s, 9H).  $^{13}\text{C}$  NMR ( $\text{CDCl}_3$ , 100 MHz)  $\delta$  163.2, 156.2, 150.9, 144.4, 137.2, 136.5, 136.1, 130.8, 130.0, 128.8, 128.8, 128.6, 128.6, 128.2, 127.9, 127.3, 125.8, 124.9, 123.2, 122.2, 121.5, 107.8, 35.2, 31.2. HRMS (EI-TOF) calcd for  $\text{C}_{28}\text{H}_{24}\text{N}_2\text{O}$  ( $\text{M}^+$ ): 404.1889, found: 404.1889.

**6,7-dimethoxy-3-phenyl-2-(quinolin-8-yl)isoquinolin-1(2H)-one (4f)**

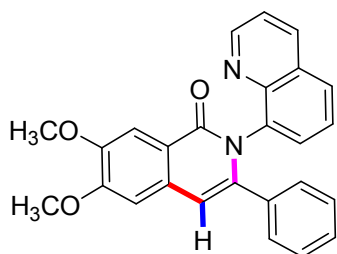

Rf 0.13 (hexane/EtOAc = 10/1). 74%, 30.2 mg. White solid;  $^1\text{H}$  NMR ( $\text{CDCl}_3$ , 400 MHz)  $\delta$  8.92 (dd,  $J_1 = 1.6$  Hz;  $J_2 = 4.0$  Hz, 1H), 8.10 (dd,  $J_1 = 1.6$  Hz;  $J_2 = 8.0$  Hz, 1H), 7.87 (s, 1H), 7.72 (dd,  $J_1 = 1.6$  Hz;  $J_2 = 8.0$  Hz, 1H), 7.42-7.47 (m, 2H), 7.36-7.40 (m, 2H), 7.08-7.10 (m, 2H), 7.02 (t,  $J = 7.2$  Hz, 1H), 6.93-6.97 (m, 2H), 6.59 (s, 1H), 4.02 (s, 3H), 3.99 (s, 3H).  $^{13}\text{C}$  NMR ( $\text{CDCl}_3$ , 100 MHz)  $\delta$  160.3, 151.6, 148.7, 142.7, 140.9, 135.3, 134.2, 133.9, 130.5, 128.4, 131.9, 126.6, 126.5, 126.4, 125.6, 125.1, 123.6, 119.2, 117.1, 106.1, 104.8, 104.1, 53.9, 53.9. HRMS (EI-TOF) calcd for  $\text{C}_{26}\text{H}_{20}\text{N}_2\text{O}_3$  ( $\text{M}^+$ ): 408.1474, found: 408.1468.

**7-iodo-3-phenyl-2-(quinolin-8-yl)isoquinolin-1(2H)-one (4g)**

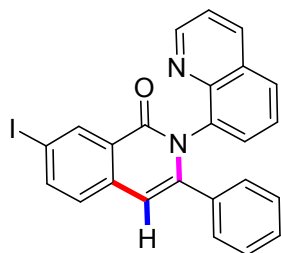

Rf 0.12 (hexane/EtOAc = 10/1). 65%, 30.8 mg. White solid;  $^1\text{H}$  NMR ( $\text{CDCl}_3$ , 400 MHz)  $\delta$  8.90 (dd,  $J_1 = 1.6$  Hz;  $J_2 = 4.0$  Hz, 1H), 8.80 (d,  $J = 1.6$  Hz, 1H), 8.10 (dd,  $J_1 = 1.6$  Hz;  $J_2 = 8.4$  Hz, 1H), 7.96 (dd,  $J_1 = 1.6$  Hz;  $J_2 = 8.4$  Hz, 1H), 7.73 (dd,  $J_1 = 1.2$  Hz;  $J_2 = 8.0$  Hz, 1H), 7.33-7.48 (m, 4H), 7.13 (d,  $J = 8.4$  Hz, 2H), 7.01-7.09 (m, 1H), 6.95 (t,  $J = 7.6$  Hz, 2H), 6.59 (s, 1H).  $^{13}\text{C}$  NMR ( $\text{CDCl}_3$ , 100 MHz)  $\delta$  161.8, 150.9, 145.4, 144.5, 141.3, 137.3, 137.0, 136.4, 136.2, 136.0, 130.6, 128.9, 128.8, 128.7, 128.2, 127.8, 127.4, 127.0, 125.9, 121.6, 106.9, 91.2. HRMS (EI-TOF) calcd for  $\text{C}_{24}\text{H}_{15}\text{IN}_2\text{O}$  ( $\text{M}^+$ ): 474.0229, found: 474.0227.

**7-bromo-3-phenyl-2-(quinolin-8-yl)isoquinolin-1(2H)-one (4h)**

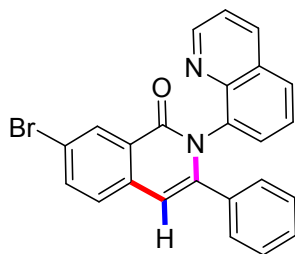

Rf 0.12 (hexane/EtOAc = 10/1). 38%, 16.2 mg. White solid;  $^1\text{H}$  NMR ( $\text{CDCl}_3$ , 400 MHz)  $\delta$  8.91 (dd,  $J_1 = 1.6$  Hz;  $J_2 = 4.0$  Hz, 1H), 8.26 (d,  $J = 8.0$  Hz, 1H), 8.10 (dd,  $J_1 = 1.6$  Hz;  $J_2 = 8.0$  Hz, 1H), 7.74 (dd,  $J_1 = 1.6$  Hz;  $J_2 = 8.0$  Hz, 1H), 7.37-7.50 (m, 5H), 7.10-7.12 (m, 2H), 7.02-7.06 (m, 1H), 6.94-6.98 (m, 2H), 6.87 (s, 1H).  $^{13}\text{C}$  NMR ( $\text{CDCl}_3$ , 100 MHz)  $\delta$  159.2, 151.0, 145.2, 144.6, 137.1, 136.1, 136.1, 130.6, 128.9, 128.8, 128.2, 127.4, 126.8, 126.8, 125.8, 124.1, 124.1, 121.6, 117.6, 117.4, 99.9, 99.8. HRMS (EI-TOF) calcd for  $\text{C}_{24}\text{H}_{15}\text{BrN}_2\text{O}$  ( $\text{M}^+$ ): 426.0368, found: 426.0367.

**6-chloro-3-phenyl-2-(quinolin-8-yl)isoquinolin-1(2H)-one (4i)**

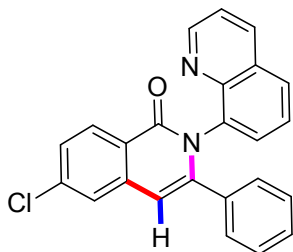

Rf 0.12 (hexane/EtOAc = 10/1). 78%, 29.8 mg. White solid;  $^1\text{H}$  NMR ( $\text{CDCl}_3$ , 400 MHz)  $\delta$  8.92 (dd,  $J_1 = 1.6$  Hz;  $J_2 = 4.0$  Hz, 1H), 8.40 (d,  $J = 8.8$  Hz, 1H), 8.10 (dd,  $J_1 = 1.6$  Hz;  $J_2 = 8.4$  Hz, 1H), 7.74 (dd,  $J_1 = 1.6$  Hz;  $J_2 = 8.0$  Hz, 1H), 7.59 (d,  $J = 2.0$  Hz, 1H), 7.38-7.50 (m, 4H), 7.09-7.11 (m, 2H), 7.02-7.06 (m, 1H), 6.96 (t,  $J = 7.2$  Hz, 2H), 6.57 (s, 1H).  $^{13}\text{C}$  NMR ( $\text{CDCl}_3$ , 100 MHz)  $\delta$  162.7, 151.0, 146.0, 144.6, 139.1, 138.5, 137.0, 136.2, 135.9, 130.7, 130.3, 128.9, 128.8, 128.7, 128.2, 127.4, 127.2, 125.9, 125.4, 123.8, 121.6, 106.4. HRMS (EI-TOF) calcd for  $\text{C}_{24}\text{H}_{15}\text{ClN}_2\text{O}$  ( $\text{M}^+$ ): 382.0873, found: 382.0873.

**7-chloro-3-phenyl-2-(quinolin-8-yl)isoquinolin-1(2H)-one (4j)**

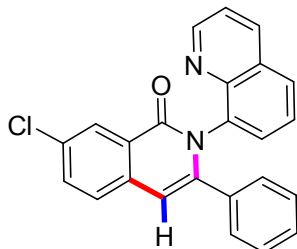

Rf 0.12 (hexane/EtOAc = 10/1). 49%, 18.7 mg. White solid;  $^1\text{H}$  NMR ( $\text{CDCl}_3$ , 400 MHz)  $\delta$  8.91 (dd,  $J_1 = 1.6$  Hz;  $J_2 = 4.0$  Hz, 1H), 8.44 (d,  $J = 2.0$  Hz, 1H), 8.10 (dd,  $J_1 = 1.6$  Hz;  $J_2 = 8.4$  Hz, 1H), 7.73 (dd,  $J_1 = 1.2$  Hz;  $J_2 = 8.0$  Hz, 1H), 7.64 (dd,  $J_1 = 2.0$  Hz;  $J_2 = 7.6$  Hz, 1H), 7.55 (d,  $J = 8.4$  Hz, 1H), 7.37-7.49 (m, 3H), 7.07-7.09 (m, 2H), 7.03 (t,  $J = 7.6$  Hz, 1H), 6.95 (t,  $J = 7.6$  Hz, 2H), 6.62 (s, 1H).  $^{13}\text{C}$  NMR ( $\text{CDCl}_3$ , 100 MHz)  $\delta$  162.2, 151.0, 144.9, 144.6, 137.0, 136.2, 136.0, 135.7, 133.2, 132.6, 130.7, 128.9, 128.8, 128.7, 128.2, 127.9, 127.8, 127.4, 126.6, 125.9, 121.6, 106.8. HRMS (EI-TOF) calcd for  $\text{C}_{24}\text{H}_{15}\text{ClN}_2\text{O}$  ( $\text{M}^+$ ): 382.0873, found: 382.0870.

**8-chloro-3-phenyl-2-(quinolin-8-yl)isoquinolin-1(2H)-one (4k)**

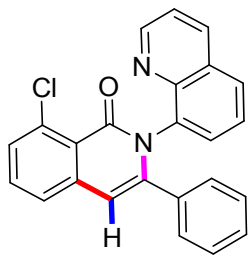

Rf 0.12 (hexane/EtOAc = 10/1). 41%, 15.7 mg. White solid;  $^1\text{H}$  NMR ( $\text{CDCl}_3$ , 400 MHz)  $\delta$  8.91 (dd,  $J_1 = 1.6$  Hz;  $J_2 = 4.0$  Hz, 1H), 8.09 (dd,  $J_1 = 1.2$  Hz;  $J_2 = 8.4$  Hz, 1H), 7.72 (dd,  $J_1 = 1.2$  Hz;  $J_2 = 8.0$  Hz, 1H), 7.36-7.53 (m, 6H), 7.10-7.12 (m, 2H), 7.02 (d,  $J = 7.2$  Hz, 1H), 6.93-6.97 (m, 2H), 6.59 (s, 1H).  $^{13}\text{C}$  NMR ( $\text{CDCl}_3$ , 100 MHz)  $\delta$  161.5, 150.9, 145.5, 144.6, 140.4, 140.0, 137.1, 136.1, 135.9, 132.4, 131.0, 129.9, 128.9, 128.7, 128.6, 128.2, 127.4, 125.9, 125.5, 121.9, 121.6, 107.0. HRMS (EI-TOF) calcd for  $\text{C}_{24}\text{H}_{15}\text{ClN}_2\text{O}$  ( $\text{M}^+$ ): 382.0873, found: 382.0873.

#### 5-fluoro-3-phenyl-2-(quinolin-8-yl)isoquinolin-1(2H)-one (4l)

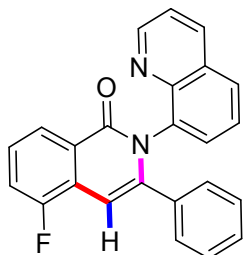

Rf 0.12 (hexane/EtOAc = 10/1). 51%, 18.7 mg. White solid;  $^1\text{H}$  NMR ( $\text{CDCl}_3$ , 400 MHz)  $\delta$  8.91 (dd,  $J_1 = 1.6$  Hz;  $J_2 = 4.4$  Hz, 1H), 8.26 (d,  $J = 7.6$  Hz, 1H), 8.10 (dd,  $J_1 = 1.6$  Hz;  $J_2 = 8.0$  Hz, 1H), 7.74 (dd,  $J_1 = 1.6$  Hz;  $J_2 = 8.0$  Hz, 1H), 7.37-7.50 (m, 5H), 7.10-7.12 (m, 2H), 7.02-7.04 (m, 1H), 6.94 (t,  $J = 7.2$  Hz, 2H), 6.87 (s, 1H).  $^{13}\text{C}$  NMR ( $\text{CDCl}_3$ , 100 MHz)  $\delta$  162.4, 162.3, 157.9 (d,  $J_{\text{C-F}} = 250.1$  Hz), 151.0, 144.9 (d,  $J_{\text{C-F}} = 65.5$  Hz), 137.0, 136.2, 136.1, 130.7, 128.9, 128.8, 128.2, 127.4, 127.2, 127.1, 126.8 (d,  $J_{\text{C-F}} = 7.3$  Hz), 125.9, 124.1, 124.1, 121.6, 117.5 (d,  $J_{\text{C-F}} = 20.3$  Hz), 99.8 (d,  $J_{\text{C-F}} = 5.3$  Hz). HRMS (EI-TOF) calcd for  $\text{C}_{24}\text{H}_{15}\text{FN}_2\text{O}$  ( $\text{M}^+$ ): 366.1168, found: 366.1160.

According to the  $^1\text{H}$  and  $^{13}\text{C}$  NMRs, there is no single peak in aromatic area of  $^1\text{H}$  NMR, herein, the C-H activation occur at the *ortho*-position to F.

### 3-phenyl-2-(quinolin-8-yl)benzo[*h*]isoquinolin-1(2*H*)-one (4m)

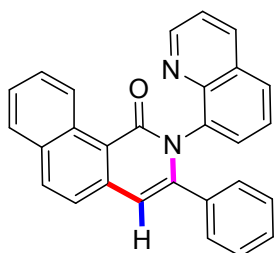

Rf 0.12 (hexane/EtOAc = 10/1). 45%, 17.9 mg. White solid;  $^1\text{H}$  NMR ( $\text{CDCl}_3$ , 400 MHz)  $\delta$  10.12 (d,  $J = 8.8$  Hz, 1H), 8.98-9.04 (m, 2H), 8.12-8.16 (m, 2H), 8.02-8.07 (m, 2H), 7.87-7.92 (m, 2H), 7.36-7.60 (m, 3H), 7.03-7.18 (m, 3H), 6.98 (t,  $J = 7.6$  Hz, 2H), 6.80 (s, 1H).  $^{13}\text{C}$  NMR ( $\text{CDCl}_3$ , 100 MHz)  $\delta$  163.7, 151.0, 147.6, 147.1, 145.8, 139.2, 134.3, 134.1, 136.5, 132.5, 131.0, 128.8, 128.6, 128.4, 128.2, 127.9, 127.4, 126.2, 126.1, 126.0, 125.0, 124.5, 124.0, 121.7, 119.1, 108.3. HRMS (EI-TOF) calcd for  $\text{C}_{28}\text{H}_{18}\text{N}_2\text{O}$  ( $\text{M}^+$ ): 398.1419, found: 398.1422.

### 3-phenyl-2-(quinolin-8-yl)benzo[*g*]isoquinolin-1(2*H*)-one (4n)

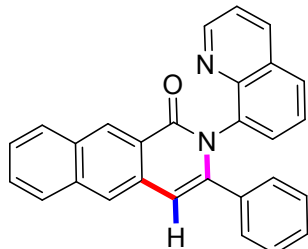

Rf 0.12 (hexane/EtOAc = 10/1). 68%, 27.1 mg. White solid;  $^1\text{H}$  NMR ( $\text{CDCl}_3$ , 400 MHz)  $\delta$  9.08 (s, 1H), 8.91 (dd,  $J_1 = 1.6$  Hz;  $J_2 = 4.0$  Hz, 1H), 8.06-8.10 (m, 3H), 7.96 (d,  $J = 8.0$  Hz, 1H), 7.72 (d,  $J = 8.0$  Hz, 1H), 7.59 (t,  $J = 7.6$  Hz, 1H), 7.48-7.57 (m, 2H), 7.35-7.44 (m, 2H), 7.12-7.15 (m, 2H), 7.03 (t,  $J = 7.6$  Hz, 1H), 6.96 (t,  $J = 7.6$  Hz, 2H), 6.76 (s, 1H).  $^{13}\text{C}$  NMR ( $\text{CDCl}_3$ , 100 MHz)  $\delta$  163.8, 150.9, 144.9, 143.5, 137.4, 136.6, 136.1, 135.8, 133.3, 132.0, 130.9, 131.6, 129.9, 129.8, 128.8, 128.7, 128.1, 127.9, 127.6, 127.3, 125.9, 125.8, 124.2, 121.5, 107.6. HRMS (EI-TOF) calcd for  $\text{C}_{28}\text{H}_{18}\text{N}_2\text{O}$  ( $\text{M}^+$ ): 398.1419, found: 398.1413.

### 5-phenyl-6-(quinolin-8-yl)thieno[2,3-*c*]pyridin-7(6*H*)-one (4o)

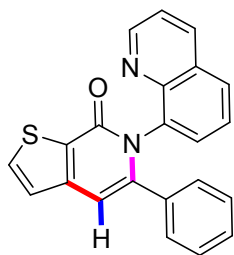

Rf 0.12 (hexane/EtOAc = 10/1). 92%, 32.4 mg. White solid;  $^1\text{H}$  NMR ( $\text{CDCl}_3$ , 400 MHz)  $\delta$  8.91 (dd,  $J_1 = 1.6$  Hz;  $J_2 = 4.0$  Hz, 1H), 8.08 (dd,  $J_1 = 1.2$  Hz;  $J_2 = 8.4$  Hz, 1H), 7.75 (d,  $J = 5.2$  Hz, 1H), 7.72 (dd,  $J_1 = 1.2$  Hz;  $J_2 = 8.4$  Hz, 1H), 7.50 (dd,  $J_1 = 1.2$  Hz;  $J_2 = 7.2$  Hz, 1H), 7.34-7.43 (m, 2H), 7.29 (d,  $J = 5.2$  Hz, 1H), 7.08-7.10 (m, 2H), 7.00-7.02 (m, 1H), 6.94 (t,  $J = 7.2$  Hz, 2H), 6.79 (s, 1H).  $^{13}\text{C}$  NMR ( $\text{CDCl}_3$ , 100 MHz)  $\delta$  159.2, 151.0, 146.1, 145.4, 144.7, 136.9, 136.3, 136.1, 134.0, 130.9, 129.4, 128.9, 128.9, 128.8, 128.0, 127.3, 125.8, 124.6, 121.6, 104.5. HRMS (EI-TOF) calcd for  $\text{C}_{22}\text{H}_{14}\text{N}_2\text{OS}$  ( $\text{M}^+$ ): 354.0827, found: 354.0833.

#### 5-phenyl-6-(quinolin-8-yl)furo[2,3-c]pyridin-7(6H)-one (4p)

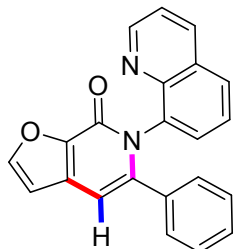

Rf 0.12 (hexane/EtOAc = 10/1). 45%, 15.2 mg. White solid;  $^1\text{H}$  NMR ( $\text{CDCl}_3$ , 400 MHz)  $\delta$  8.91 (dd,  $J_1 = 1.6$  Hz;  $J_2 = 4.4$  Hz, 1H), 8.09 (dd,  $J_1 = 1.6$  Hz;  $J_2 = 8.0$  Hz, 1H), 7.82 (d,  $J = 2.0$  Hz, 1H), 7.73 (dd,  $J_1 = 1.2$  Hz;  $J_2 = 8.0$  Hz, 1H), 7.50 (dd,  $J_1 = 1.2$  Hz;  $J_2 = 7.2$  Hz, 1H), 7.36-7.44 (m, 2H), 6.98-7.05 (m, 3H), 6.92 (t,  $J = 7.2$  Hz, 2H), 6.77 (d,  $J = 2.0$  Hz, 1H), 6.60 (s, 1H).  $^{13}\text{C}$  NMR ( $\text{CDCl}_3$ , 100 MHz)  $\delta$  154.0, 151.0, 148.6, 145.5, 144.6, 143.0, 136.6, 136.3, 136.2, 133.1, 131.0, 129.0, 128.9, 128.8, 128.0, 127.2, 125.8, 121.6, 107.6, 101.7. HRMS (EI-TOF) calcd for  $\text{C}_{22}\text{H}_{14}\text{N}_2\text{O}_2$  ( $\text{M}^+$ ): 338.1005, found: 338.1008.

#### 3-phenyl-2-(quinolin-8-yl)-5,6,7,8-tetrahydroisoquinolin-1(2H)-one (6a)

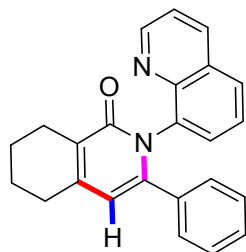

Rf 0.24 (hexane/EtOAc = 10/1). 53%, 18.7 mg. White solid;  $^1\text{H}$  NMR ( $\text{CDCl}_3$ , 400 MHz)  $\delta$  8.94 (dd,  $J_1 = 1.2$  Hz;  $J_2 = 4.0$  Hz, 1H), 8.08 (dd,  $J_1 = 1.2$  Hz;  $J_2 = 8.4$  Hz, 1H), 7.69-7.73 (m, 1H), 7.35-7.44 (m, 3H), 6.98-7.04 (m, 3H), 6.92 (t,  $J = 7.6$  Hz, 2H), 6.12 (s, 1H), 2.63-2.67 (m, 4H), 1.83 (s, 4H).  $^{13}\text{C}$  NMR ( $\text{CDCl}_3$ , 100 MHz)  $\delta$  163.3, 151.0, 147.6, 145.7, 144.6, 137.2, 136.2, 136.0, 130.5, 128.8, 128.6, 128.6, 128.0, 127.3, 126.4, 125.8, 121.5, 109.9, 29.5, 23.9, 22.3, 22.1. HRMS (EI-TOF) calcd for  $\text{C}_{24}\text{H}_{20}\text{N}_2\text{O}$  ( $\text{M}^+$ ): 352.1576, found: 352.1577.

### 3,4-dimethyl-6-phenyl-1-(quinolin-8-yl)pyridin-2(1H)-one (6b)

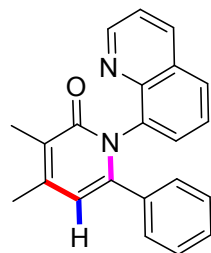

Rf 0.24 (hexane/EtOAc = 10/1). 43%, 14.0 mg. White solid;  $^1\text{H}$  NMR ( $\text{CDCl}_3$ , 400 MHz)  $\delta$  8.94 (dd,  $J_1 = 1.6$  Hz;  $J_2 = 4.0$  Hz, 1H), 8.08 (dd,  $J_1 = 1.6$  Hz;  $J_2 = 8.0$  Hz, 1H), 7.71 (dd,  $J_1 = 2.0$  Hz;  $J_2 = 7.6$  Hz, 1H), 7.35-7.44 (m, 3H), 7.00-7.04 (m, 3H), 6.93 (t,  $J = 7.6$  Hz, 2H), 6.20 (s, 1H), 2.30 (s, 3H), 2.20 (s, 3H).  $^{13}\text{C}$  NMR ( $\text{CDCl}_3$ , 100 MHz)  $\delta$  163.5, 151.1, 146.4, 145.8, 144.6, 137.5, 136.1, 135.9, 130.3, 128.8, 128.6, 128.6, 128.0, 127.3, 125.8, 125.2, 121.5, 111.0, 20.1, 12.8. HRMS (EI-TOF) calcd for  $\text{C}_{22}\text{H}_{18}\text{N}_2\text{O}$  ( $\text{M}^+$ ): 326.1419, found: 326.1425.

### 4-ethyl-3-methyl-6-phenyl-1-(quinolin-8-yl)pyridin-2(1H)-one (6c)



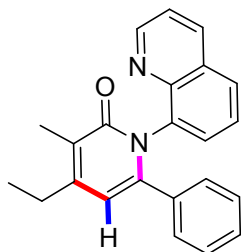

Rf 0.24 (hexane/EtOAc = 10/1). 71%, 24.1 mg. White solid;  $^1\text{H}$  NMR ( $\text{CDCl}_3$ , 400 MHz)  $\delta$  8.93 (dd,  $J_1 = 2.0$  Hz;  $J_2 = 4.4$  Hz, 1H), 8.07 (dd,  $J_1 = 1.6$  Hz;  $J_2 = 8.0$  Hz, 1H), 7.69 (dd,  $J_1 = 1.6$  Hz;  $J_2 = 8.0$  Hz, 1H), 7.34-7.43 (m, 3H), 6.98-7.05 (m, 3H), 6.91-6.95 (m, 2H), 6.21 (s, 1H), 2.56-2.73 (m, 2H), 2.21 (s, 3H), 1.28 (t,  $J = 8.0$  Hz, 3H).  $^{13}\text{C}$  NMR ( $\text{CDCl}_3$ , 100 MHz)  $\delta$  163.8, 151.7, 151.0, 146.2, 144.6, 137.6, 136.1, 136.1, 130.3, 128.8, 128.6, 128.6, 128.0, 127.3, 125.8, 124.4, 121.5, 109.2, 26.8, 13.4, 12.3. HRMS (EI-TOF) calcd for  $\text{C}_{23}\text{H}_{20}\text{N}_2\text{O}$  ( $\text{M}^+$ ): 340.1576, found: 340.1576

### 3-methyl-4,6-diphenyl-1-(quinolin-8-yl)pyridin-2(1H)-one (6d)

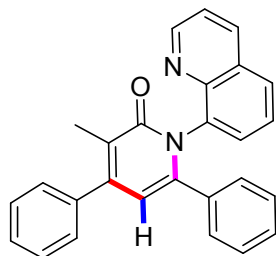

Rf 0.24 (hexane/EtOAc = 10/1). 42%, 16.3 mg. White solid;  $^1\text{H}$  NMR ( $\text{CDCl}_3$ , 400 MHz)  $\delta$  9.00 (dd,  $J_1 = 1.6$  Hz;  $J_2 = 4.0$  Hz, 1H), 8.12 (dd,  $J_1 = 1.6$  Hz;  $J_2 = 8.4$  Hz, 1H), 7.74 (dd,  $J_1 = 1.2$  Hz;  $J_2 = 8.0$  Hz, 1H), 7.39-7.51 (m, 8H), 7.07-7.09 (m, 2H), 7.01 (d,  $J = 7.2$  Hz, 1H), 6.92-6.96 (m, 2H), 6.34 (s, 1H), 2.21 (s, 3H).  $^{13}\text{C}$  NMR ( $\text{CDCl}_3$ , 100 MHz)  $\delta$  164.1, 151.1, 149.5, 146.2, 144.6, 139.8, 137.5, 136.2, 135.9, 130.3, 128.8, 128.6, 128.6, 128.4, 128.1, 128.0, 127.4, 125.9, 125.1, 121.6, 110.1, 14.6. HRMS (EI-TOF) calcd for  $\text{C}_{27}\text{H}_{20}\text{N}_2\text{O}$  ( $\text{M}^+$ ): 388.1576, found: 388.1577.

### 3-(2-chlorophenyl)-6-phenyl-1-(quinolin-8-yl)pyridin-2(1H)-one (6e)

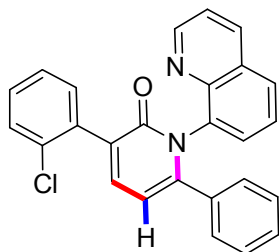

Rf 0.28 (hexane/EtOAc = 10/1). 81%, 33.0 mg. White solid;  $^1\text{H}$  NMR ( $\text{CDCl}_3$ , 400 MHz)  $\delta$  8.93 (dd,  $J_1 = 1.6$  Hz;  $J_2 = 7.6$  Hz, 1H), 8.06 (dd,  $J_1 = 1.6$  Hz;  $J_2 = 8.0$  Hz, 1H), 7.67-7.72 (m, 2H), 7.50-7.57 (m, 2H), 7.35-7.45 (m, 3H), 7.21-7.27 (m, 2H), 7.11-7.13 (m, 2H), 7.05 (t,  $J = 7.2$  Hz, 1H), 6.96-6.99 (m, 2H), 6.43 (d,  $J = 7.2$  Hz, 1H).  $^{13}\text{C}$  NMR ( $\text{CDCl}_3$ , 100 MHz)  $\delta$  161.8, 151.0, 150.6, 140.1, 137.0, 136.0, 135.8, 135.7, 133.7, 132.1, 130.3, 129.6, 129.0, 129.0, 128.9, 128.8, 128.8, 128.5, 128.4, 127.5, 126.4, 125.8, 121.6, 106.9. HRMS (EI-TOF) calcd for  $\text{C}_{26}\text{H}_{17}\text{ClN}_2\text{O}$  ( $\text{M}^+$ ): 408.1029, found: 408.1035.

### 3-(3-chlorophenyl)-6-phenyl-1-(quinolin-8-yl)pyridin-2(1H)-one (6f)

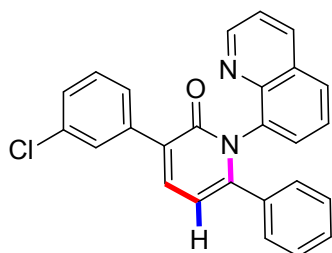

Rf 0.28 (hexane/EtOAc = 10/1). 79%, 32.2 mg. White solid;  $^1\text{H}$  NMR ( $\text{CDCl}_3$ , 400 MHz)  $\delta$  8.92 (dd,  $J_1 = 1.6$  Hz;  $J_2 = 4.0$  Hz, 1H), 8.06 (dd,  $J_1 = 1.6$  Hz;  $J_2 = 8.0$  Hz, 1H), 7.66-7.71 (m, 2H), 7.50-7.56 (m, 2H), 7.34-7.45 (m, 3H), 7.21-7.29 (m, 2H), 7.11-7.13 (m, 2H), 7.04 (t,  $J = 7.2$  Hz, 1H), 6.97 (t,  $J = 7.2$  Hz, 2H), 6.43 (d,  $J = 6.8$  Hz, 1H).  $^{13}\text{C}$  NMR ( $\text{CDCl}_3$ , 100 MHz)  $\delta$  161.7, 150.9, 150.5, 144.2, 140.0, 136.9, 135.9, 135.6, 135.6, 133.6, 132.0, 130.2, 129.4, 128.9, 128.7, 128.7, 128.6, 128.4, 128.3, 127.3, 126.2, 125.6, 121.5, 106.7. HRMS (EI-TOF) calcd for  $\text{C}_{26}\text{H}_{17}\text{ClN}_2\text{O}$  ( $\text{M}^+$ ): 408.1029, found: 408.1022.

### 3-(4-chlorophenyl)-6-phenyl-1-(quinolin-8-yl)pyridin-2(1H)-one (6g)

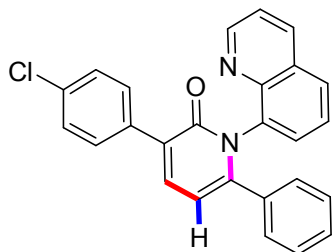

Rf 0.29 (hexane/EtOAc = 5/1). 86%, 35.1 mg. White solid;  $^1\text{H}$  NMR ( $\text{CDCl}_3$ , 400 MHz)  $\delta$  8.94 (dd,  $J_1 = 1.6$  Hz;  $J_2 = 4.4$  Hz, 1H), 8.09 (dd,  $J_1 = 1.6$  Hz;  $J_2 = 8.4$  Hz, 1H), 7.67-7.79 (m, 4H), 7.37-7.49 (m, 4H), 6.95-7.10 (m, 6H), 6.45 (d,  $J = 7.2$  Hz, 1H).  $^{13}\text{C}$  NMR ( $\text{CDCl}_3$ , 100 MHz)  $\delta$  161.7, 151.2, 151.1, 144.2, 140.6, 140.5, 136.9, 136.2, 135.4, 130.1, 129.1, 129.0, 128.8, 128.6, 128.4, 127.5, 126.0, 125.8, 122.8, 121.8, 119.8, 107.2. HRMS (EI-TOF) calcd for  $\text{C}_{26}\text{H}_{17}\text{ClN}_2\text{O}$  ( $\text{M}^+$ ): 408.1029, found: 408.1029.

#### 4,6-diphenyl-1-(quinolin-8-yl)pyridin-2(1H)-one (6h)

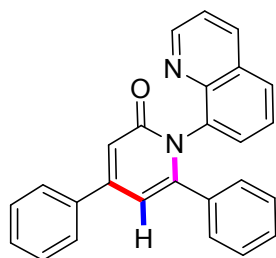

Rf 0.29 (hexane/EtOAc = 5/1). 65%, 24.3 mg. White solid;  $^1\text{H}$  NMR ( $\text{CDCl}_3$ , 400 MHz)  $\delta$  8.96 (s, 1H), 8.09 (d,  $J = 8.0$  Hz, 1H), 7.72 (d,  $J = 4.4$  Hz, 3H), 7.38-7.50 (m, 6H), 6.94-7.11 (m, 6H), 6.60 (s, 1H).  $^{13}\text{C}$  NMR ( $\text{CDCl}_3$ , 100 MHz)  $\delta$  151.8, 151.1, 150.4, 148.4, 144.4, 137.8, 136.2, 135.9, 130.5, 129.5, 129.0, 129.0, 128.9, 128.5, 128.4, 127.4, 127.0, 125.9, 122.1, 121.7, 116.7, 107.5. HRMS (EI-TOF) calcd for  $\text{C}_{26}\text{H}_{18}\text{N}_2\text{O}$  ( $\text{M}^+$ ): 374.1419, found: 374.1420.

#### 3,6-diphenyl-1-(quinolin-8-yl)pyridin-2(1H)-one (6i)

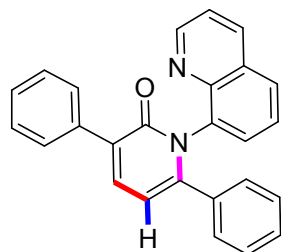

Rf 0.22 (hexane/EtOAc = 10/1). 55%, 20.6 mg. White solid;  $^1\text{H}$  NMR ( $\text{CDCl}_3$ , 400 MHz) 8.94 (dd,  $J_1 = 1.6$  Hz;  $J_2 = 4.4$  Hz, 1H), 8.09 (dd,  $J_1 = 1.6$  Hz;  $J_2 = 8.4$  Hz, 1H), 7.82 (d,  $J = 7.2$  Hz, 2H). 7.71-7.76 (m, 2H), 7.50 (dd,  $J_1 = 0.8$  Hz;  $J_2 = 3.2$  Hz, 1H), 7.26-7.44 (m, 5H), 7.03-7.10 (m, 3H), 6.96 (t,  $J = 7.2$  Hz, 2H), 6.44 (d,  $J = 7.2$  Hz, 1H).  $^{13}\text{C}$  NMR ( $\text{CDCl}_3$ , 100 MHz)  $\delta$  162.4, 151.1, 149.7, 144.4, 137.9, 137.3, 136.9, 136.1, 135.8, 130.3, 129.0, 128.8, 128.5, 128.3, 128.1, 128.0, 127.5, 127.5, 126.0, 125.8, 121.6, 107.6. HRMS (EI-TOF) calcd for  $\text{C}_{26}\text{H}_{18}\text{N}_2\text{O}$  ( $\text{M}^+$ ): 374.1419, found: 374.1423.

### 3-methyl-6-phenyl-1-(quinolin-8-yl)pyridin-2(1H)-one (6j)

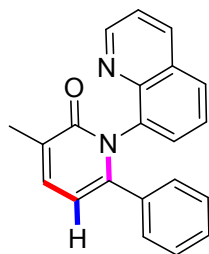

Rf 0.44 (hexane/EtOAc = 10/1). 77%, 24.0 mg. White solid;  $^1\text{H}$  NMR ( $\text{CDCl}_3$ , 400 MHz)  $\delta$  8.94 (dd,  $J_1 = 1.6$  Hz;  $J_2 = 4.0$  Hz, 1H), 8.08 (d,  $J = 7.6$  Hz, 1H), 7.71 (dd,  $J_1 = 1.6$  Hz;  $J_2 = 8.0$  Hz, 1H). 7.36-7.45 (m, 4H), 6.99-7.03 (m, 3H), 6.91-6.94 (m, 2H), 6.27 (d,  $J = 7.2$  Hz, 1H), 2.25 (s, 3H).  $^{13}\text{C}$  NMR ( $\text{CDCl}_3$ , 100 MHz)  $\delta$  163.8, 151.0, 147.9, 144.4, 137.3, 137.3, 136.2, 135.9, 131.0, 130.3, 128.8, 128.7, 128.6, 128.1, 127.4, 125.8, 121.6, 107.2, 17.3. HRMS (EI-TOF) calcd for  $\text{C}_{21}\text{H}_{16}\text{N}_2\text{O}$  ( $\text{M}^+$ ): 312.1263, found: 312.1267.

### 3-phenyl-2-(quinolin-8-yl)-4-(trimethylsilyl)isoquinolin-1(2H)-one (7a)

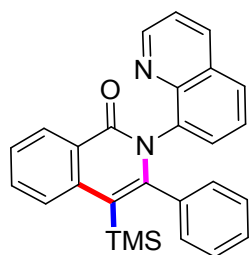

Rf 0.44 (hexane/EtOAc = 10/1). 76%, 31.9 mg. White solid;  $^1\text{H}$  NMR ( $\text{CDCl}_3$ , 400 MHz)  $\delta$  8.93 (dd,  $J_1 = 1.6$  Hz;  $J_2 = 4.0$  Hz, 1H), 8.56 (dd,  $J_1 = 1.6$  Hz;  $J_2 = 8.0$  Hz, 1H),

8.07 (d,  $J = 7.6$  Hz, 1H). 8.00 (d,  $J = 8.4$  Hz, 1H), 7.69-7.74 (m, 1H), 7.64 (t,  $J = 4.8$  Hz, 1H), 7.49-7.3 (m, 1H), 7.33-7.39 (m, 3H), 7.18 (d,  $J = 7.6$  Hz, 1H), 7.04-7.08 (m, 1H), 6.95 (t,  $J = 7.6$  Hz, 1H), 6.87 (d,  $J = 7.6$  Hz, 1H), 6.63 (t,  $J = 7.2$  Hz, 1H), 0.00 (s, 9H).  $^{13}\text{C}$  NMR ( $\text{CDCl}_3$ , 100 MHz)  $\delta$  160.9, 148.4, 147.2, 138.5, 135.5, 135.2, 134.2, 129.6, 129.2, 129.1, 127.9, 126.7, 126.5, 126.3, 126.1, 125.5, 124.8, 124.5, 124.0, 123.7, 119.3, 109.5, 0.01. HRMS (EI-TOF) calcd for  $\text{C}_{27}\text{H}_{24}\text{N}_2\text{OSi}$  ( $\text{M}^+$ ): 420.1658, found: 420.1654.

**3-(4-bromophenyl)-2-(quinolin-8-yl)-4-(trimethylsilyl)isoquinolin-1(2H)-one (7b)**

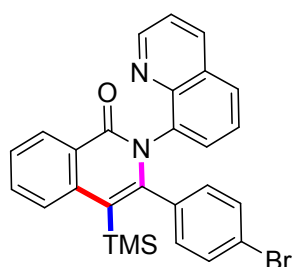

Rf 0.20 (hexane/EtOAc = 10/1). 81%, 40.3 mg. White solid;  $^1\text{H}$  NMR ( $\text{CDCl}_3$ , 400 MHz)  $\delta$  8.88 (dd,  $J_1 = 1.6$  Hz;  $J_2 = 4.0$  Hz, 1H), 8.54 (dd,  $J_1 = 1.2$  Hz;  $J_2 = 8.0$  Hz, 1H), 8.06 (dd,  $J_1 = 1.6$  Hz;  $J_2 = 8.4$  Hz, 1H). 7.98 (d,  $J = 8.0$  Hz, 1H), 7.66-7.71 (m, 2H), 7.51 (t,  $J = 7.2$  Hz, 1H), 7.34-7.37 (m, 3H), 7.20 (d,  $J = 8.4$  Hz, 1H), 7.05 (d,  $J = 8.0$  Hz, 1H), 6.77 (s, 2H), 0.02 (s, 9H).  $^{13}\text{C}$  NMR ( $\text{CDCl}_3$ , 100 MHz)  $\delta$  160.6, 148.5, 145.7, 142.4, 138.1, 135.2, 134.0, 133.9, 130.6, 129.5, 129.4, 128.7, 127.9, 127.5, 126.6, 126.5, 125.3, 124.1, 123.5, 120.2, 119.3, 109.6, 0.01. HRMS (EI-TOF) calcd for  $\text{C}_{27}\text{H}_{23}\text{BrN}_2\text{OSi}$  ( $\text{M}^+$ ): 498.0763, found: 498.0763.

**3-(3-chlorophenyl)-2-(quinolin-8-yl)-4-(trimethylsilyl)isoquinolin-1(2H)-one (7c)  
4-(3-chlorophenyl)-2-(quinolin-8-yl)-3-(trimethylsilyl)isoquinolin-1(2H)-one (7c')**

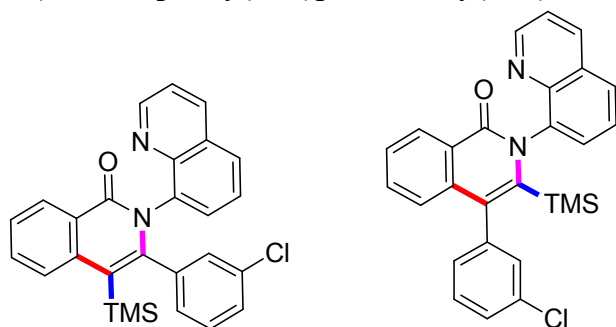

The ratio of two isomers was 1:1 as determined by  $^1\text{H}$  NMR. Rf 0.20 (hexane/EtOAc

= 10/1). 90%, 40.9 mg. White solid;  $^1\text{H}$  NMR ( $\text{CDCl}_3$ , 400 MHz, a mixture of two isomer)  $\delta$  8.93 (dd,  $J_1 = 1.6$  Hz;  $J_2 = 4.0$  Hz, 1H), 8.88 (dd,  $J_1 = 1.6$  Hz;  $J_2 = 4.0$  Hz, 1H), 8.54-8.57 (m, 2H), 8.04-8.08 (m, 2H), 8.00 (d,  $J = 8.4$  Hz, 2H), 7.70-7.74 (m, 2H), 7.65-7.67 (m, 2H), 7.50-7.54 (m, 2H), 7.34-7.40 (m, 6H), 7.19 (t,  $J = 1.6$  Hz, 1H), 7.03 (d,  $J = 7.6$  Hz, 1H), 6.90-6.97 (m, 4H), 6.77 (d,  $J = 8.0$  Hz, 1H), 6.56 (t,  $J = 8.0$  Hz, 1H), 0.03 (s, 18H).  $^{13}\text{C}$  NMR ( $\text{CDCl}_3$ , 100 MHz)  $\delta$  160.7, 160.6, 148.6, 148.6, 145.5, 145.4, 142.5, 142.4, 138.1, 136.7, 136.5, 135.2, 133.9, 130.6, 130.4, 129.6, 129.1, 128.9, 128.7, 128.3, 127.1, 126.6, 126.6, 126.5, 126.5, 126.5, 126.1, 126.1, 126.0, 125.8, 125.7, 125.4, 124.2, 124.0, 123.9, 123.6, 123.5, 119.4, 119.3, 109.7, 109.5, 0.003. HRMS (EI-TOF) calcd for  $\text{C}_{27}\text{H}_{23}\text{ClN}_2\text{OSi}$  ( $\text{M}^+$ ): 454.1268, found: 454.1267.

**3-(pyridin-2-yl)-2-(quinolin-8-yl)-4-(trimethylsilyl)isoquinolin-1(2H)-one (7d)**

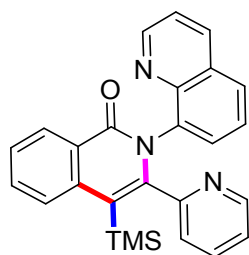

Rf 0.20 (hexane/EtOAc = 5/1). 83%. 34.9 mg. White solid;  $^1\text{H}$  NMR ( $\text{CDCl}_3$ , 400 MHz)  $\delta$  8.89 (dd,  $J_1 = 1.6$  Hz;  $J_2 = 4.0$  Hz, 1H), 8.57 (dd,  $J_1 = 1.2$  Hz;  $J_2 = 8.0$  Hz, 1H), 8.32 (d,  $J = 4.0$  Hz, 1H), 8.03 (dd,  $J_1 = 2.8$  Hz;  $J_2 = 8.4$  Hz, 2H). 7.70-7.74 (m, 1H), 7.61-7.63 (m, 1H), 7.52 (t,  $J = 7.2$  Hz, 2H), 7.31-7.36 (m, 2H), 7.02 (d,  $J = 6.8$  Hz, 2H), 6.84-6.88 (m, 1H), 0.00 (s, 9H).  $^{13}\text{C}$  NMR ( $\text{CDCl}_3$ , 100 MHz)  $\delta$  161.1, 153.7, 149.0, 146.4, 145.9, 142.9, 138.7, 135.5, 134.3, 132.9, 130.0, 130.0, 127.1, 126.8, 126.0, 124.7, 124.6, 124.3, 124.0, 121.2, 119.7, 109.9, 0.01. HRMS (EI-TOF) calcd for  $\text{C}_{26}\text{H}_{23}\text{N}_3\text{OSi}$  ( $\text{M}^+$ ): 421.1610, found: 421.1605.

**3-(prop-1-en-2-yl)-2-(quinolin-8-yl)-4-(trimethylsilyl)isoquinolin-1(2H)-one (7e)**  
**4-(prop-1-en-2-yl)-2-(quinolin-8-yl)-3-(trimethylsilyl)isoquinolin-1(2H)-one (7e')**

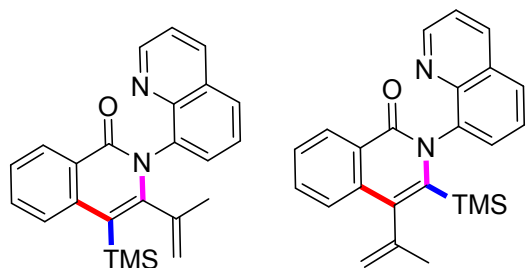

The ratio of two isomers was 1:1 as determined by  $^1\text{H}$  NMR. Rf 0.20 (hexane/EtOAc = 5/1). 57%. 21.9 mg. White solid;  $^1\text{H}$  NMR ( $\text{CDCl}_3$ , 400 MHz, a mixture of two isomer)  $\delta$  8.93 (dd,  $J_1 = 1.6$  Hz;  $J_2 = 4.4$  Hz, 1H), 8.83 (dd,  $J_1 = 1.6$  Hz;  $J_2 = 4.4$  Hz, 1H), 8.47-8.50 (m, 2H), 8.15-8.22 (m, 2H), 7.88-7.97 (m, 4H), 7.55-7.72 (m, 5H), 7.35-7.47 (m, 5H), 5.20 (s, 1H), 5.07 (s, 1H), 4.84 (s, 1H), 4.54 (s, 1H), 1.74 (s, 3H), 1.15 (s, 3H), 0.43 (d,  $J = 3.2$  Hz, 18H).  $^{13}\text{C}$  NMR ( $\text{CDCl}_3$ , 100 MHz)  $\delta$  163.4, 162.9, 151.4, 151.1, 151.1, 150.7, 145.4, 145.1, 142.2, 140.8, 140.8, 139.5, 137.6, 137.3, 136.3, 136.0, 131.9, 131.5, 130.3, 129.2, 129.1, 128.8, 128.8, 128.7, 128.7, 127.5, 127.4, 126.0, 125.9, 125.8, 125.8, 125.7, 123.0, 121.9, 121.6, 121.5, 109.9, 108.7, 26.0, 23.3, 3.32, 3.31. HRMS (EI-TOF) calcd for  $\text{C}_{24}\text{H}_{24}\text{N}_2\text{OSi}$  ( $\text{M}^+$ ): 384.1658, found: 384.1655.

#### 7-iodo-3-phenyl-2-(quinolin-8-yl)-4-(trimethylsilyl)isoquinolin-1(2H)-one (7f)

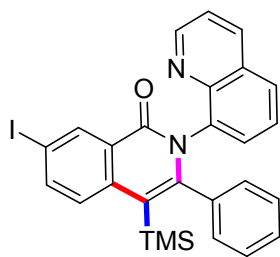

Rf 0.20 (hexane/EtOAc = 5/1). 37%. 20.2 mg. White solid;  $^1\text{H}$  NMR ( $\text{CDCl}_3$ , 400 MHz)  $\delta$  8.87-8.90 (m, 2H), 8.04 (dd,  $J_1 = 1.6$  Hz;  $J_2 = 4.0$  Hz, 1H), 7.97 (dd,  $J_1 = 2.0$  Hz;  $J_2 = 8.8$  Hz, 1H), 7.72 (d,  $J = 8.4$  Hz, 1H), 7.64 (dd,  $J_1 = 4.4$  Hz;  $J_2 = 6.0$  Hz, 1H), 7.32-7.38 (m, 3H), 7.15 (d,  $J = 7.6$  Hz, 1H), 7.04-7.07 (m, 1H), 6.93-6.96 (m, 1H), 6.81 (d,  $J = 8.0$  Hz, 1H), 6.60-6.64 (m, 1H), -0.03 (s, 9H).  $^{13}\text{C}$  NMR ( $\text{CDCl}_3$ , 100 MHz)  $\delta$  159.6, 148.7, 148.1, 142.6, 138.3, 137.8, 135.6, 135.0, 134.0, 129.1, 128.9, 127.9, 127.3, 126.6, 126.4, 125.8, 125.0, 124.7, 123.7, 119.5, 109.2, 88.9, 0.01. HRMS (EI-TOF) calcd for  $\text{C}_{27}\text{H}_{23}\text{IN}_2\text{OSi}$  ( $\text{M}^+$ ): 546.0624, found: 546.0622.

**7-chloro-3-phenyl-2-(quinolin-8-yl)-4-(trimethylsilyl)isoquinolin-1(2H)-one (7g)**

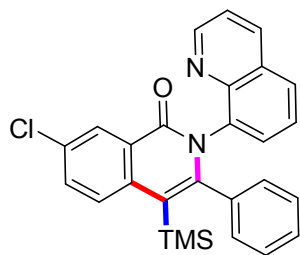

Rf 0.20 (hexane/EtOAc = 5/1). 36%. 16.3 mg. White solid;  $^1\text{H}$  NMR ( $\text{CDCl}_3$ , 400 MHz)  $\delta$  8.90 (dd,  $J_1 = 1.6$  Hz;  $J_2 = 4.0$  Hz, 1H), 8.50 (d,  $J = 2.4$  Hz, 1H), 8.03-8.06 (m, 1H), 7.94 (d,  $J = 8.8$  Hz, 1H), 7.63-7.66 (m, 2H), 7.32-7.38 (m, 3H), 7.16 (d,  $J = 7.6$  Hz, 1H), 7.04-7.08 (m, 1H), 6.93-6.97 (m, 1H), 6.82 (d,  $J = 7.6$  Hz, 1H), 6.60-6.64 (m, 1H), -0.02 (s, 9H).  $^{13}\text{C}$  NMR ( $\text{CDCl}_3$ , 100 MHz)  $\delta$  160.0, 148.7, 147.7, 142.6, 137.0, 135.4, 135.0, 134.0, 130.0, 129.2, 128.9, 128.0, 127.1, 126.6, 126.4, 126.1, 125.4, 124.9, 124.6, 123.7, 119.5, 109.1, 0.006. HRMS (EI-TOF) calcd for  $\text{C}_{27}\text{H}_{23}\text{ClN}_2\text{OSi}$  ( $\text{M}^+$ ): 454.1268, found: 454.1276.

**6-phenyl-5-(quinolin-8-yl)-7-(trimethylsilyl)thieno[3,2-c]pyridin-4(5H)-one (7h)**

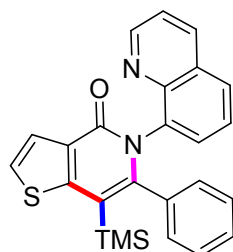

Rf 0.20 (hexane/EtOAc = 5/1). 76%. 32.4 mg. White solid;  $^1\text{H}$  NMR ( $\text{CDCl}_3$ , 400 MHz)  $\delta$  8.91 (dd,  $J_1 = 1.6$  Hz;  $J_2 = 4.0$  Hz, 1H), 8.03 (dd,  $J_1 = 1.6$  Hz;  $J_2 = 8.8$  Hz, 1H), 7.78 (d,  $J = 5.2$  Hz, 1H), 7.63 (dd,  $J_1 = 1.6$  Hz;  $J_2 = 8.0$  Hz, 1H), 7.57 (d,  $J = 5.2$  Hz, 1H), 7.31-7.38 (m, 3H), 7.15 (d,  $J = 7.6$  Hz, 1H), 7.03-7.07 (m, 1H), 6.94 (t,  $J = 7.6$  Hz, 1H), 6.85 (d,  $J = 7.6$  Hz, 1H), 6.61-6.65 (m, 1H), -0.03 (s, 9H).  $^{13}\text{C}$  NMR ( $\text{CDCl}_3$ , 100 MHz)  $\delta$  157.6, 149.4, 148.8, 147.5, 143.4, 135.9, 135.6, 134.7, 131.5, 129.8, 129.8, 128.5, 127.3, 126.9, 125.6, 125.3, 125.0, 124.3, 120.2, 109.2, 0.017. HRMS (EI-TOF) calcd for  $\text{C}_{25}\text{H}_{22}\text{N}_2\text{OSSi}$  ( $\text{M}^+$ ): 426.1222, found: 426.1222



**3-methyl-6-phenyl-1-(quinolin-8-yl)-5-(trimethylsilyl)pyridin-2(1H)-one (7i)**

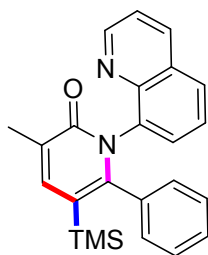

Rf 0.20 (hexane/EtOAc = 5/1). 52%. 20.0 mg. White solid;  $^1\text{H}$  NMR ( $\text{CDCl}_3$ , 400 MHz)  $\delta$  8.92-8.93 (m, 1H), 8.02-8.04 (m, 1H), 7.62 (dd,  $J_1 = 1.6$  Hz;  $J_2 = 8.0$  Hz, 1H), 7.53 (s, 1H), 7.32-7.38 (m, 3H), 7.05-7.13 (m, 2H), 6.96 (t,  $J = 7.6$  Hz, 1H), 6.82 (d,  $J = 8.0$  Hz, 1H), 6.68 (t,  $J = 7.6$  Hz, 1H), 2.26 (s, 3H), -0.11 (s, 9H).  $^{13}\text{C}$  NMR ( $\text{CDCl}_3$ , 100 MHz)  $\delta$  163.3, 152.5, 150.7, 144.2, 142.2, 137.5, 136.1, 135.9, 130.3, 129.2, 128.4, 128.1, 127.6, 126.8, 126.6, 125.6, 121.4, 112.9, 17.1, 0.015. HRMS (EI-TOF) calcd for  $\text{C}_{24}\text{H}_{24}\text{N}_2\text{OSi}$  ( $\text{M}^+$ ): 384.1658, found: 384.1655.

**3-methyl-4,6-diphenyl-1-(quinolin-8-yl)-5-(trimethylsilyl)pyridin-2(1H)-one (7j)**

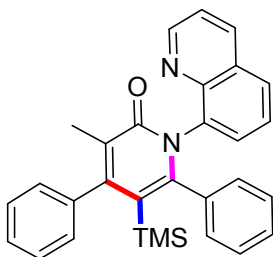

Rf 0.20 (hexane/EtOAc = 5/1). 52%. 23.9 mg. White solid;  $^1\text{H}$  NMR ( $\text{CDCl}_3$ , 400 MHz)  $\delta$  9.00-9.01 (m, 1H), 8.06 (dd,  $J_1 = 1.2$  Hz;  $J_2 = 8.4$  Hz, 1H), 7.63 (dd,  $J_1 = 4.0$  Hz;  $J_2 = 5.6$  Hz, 1H), 7.37-7.47 (m, 5H), 7.32-7.33 (m, 3H), 7.20 (d,  $J = 8.0$  Hz, 1H), 7.07 (t,  $J = 7.6$  Hz, 1H), 6.95 (t,  $J = 7.2$  Hz, 1H), 6.86 (d,  $J = 8.0$  Hz, 1H), 6.62 (t,  $J = 7.6$  Hz, 1H), 1.94 (s, 3H), -0.59 (s, 9H).  $^{13}\text{C}$  NMR ( $\text{CDCl}_3$ , 100 MHz)  $\delta$  160.6, 153.2, 149.8, 148.4, 142.2, 139.1, 135.6, 134.6, 133.6, 128.6, 128.0, 127.6, 127.2, 126.5, 125.9, 125.6, 125.2, 124.4, 124.2, 123.3, 119.0, 111.6, 12.2, 0.014. HRMS (EI-TOF) calcd for  $\text{C}_{30}\text{H}_{28}\text{N}_2\text{OSi}$  ( $\text{M}^+$ ): 460.1971, found: 460.1971.

## Gram-Scale Synthesis of **3a** and **7a**

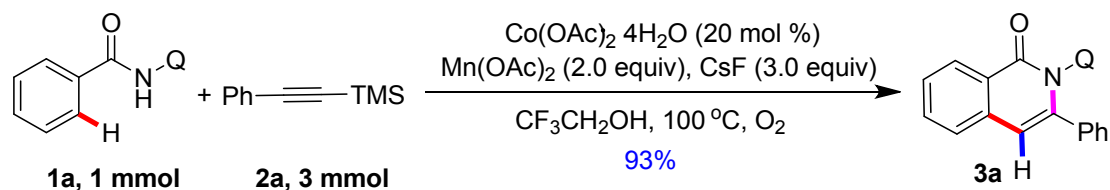

A 25 mL sealed tube was charged with amide **1a** (1 mmol), alkynylsilanes **2a** (3 mmol),  $\text{Co(OAc)}_2 \cdot 4\text{H}_2\text{O}$  (50 mg, 0.2 mmol),  $\text{Mn(OAc)}_2$  (346 mg, 2 mmol),  $\text{CsF}$  (456 mg, 3 mmol) and  $\text{CF}_3\text{CH}_2\text{OH}$  (10 mL). The vial was evacuated and filled with  $\text{O}_2$  atmosphere for five times, and stirred at  $100\text{ }^\circ\text{C}$  for 24 h. The mixture was then cooled to room temperature, diluted with EtOAc, filtered through a celite pad, and concentrated in vacuo. The residue was purified by flash column chromatography on silica gel, eluting with EtOAc/hexane (1:5 ~ 1:1, v/v), to afford the desired product **3a** (yield = 93%).

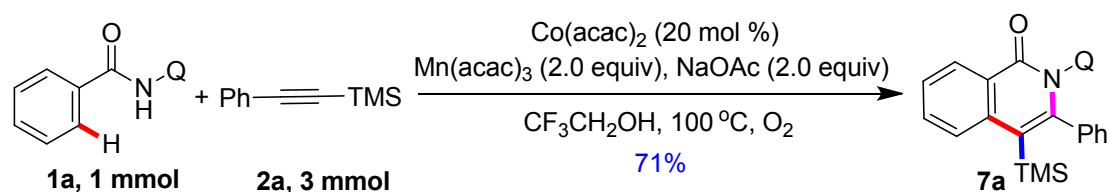

A 25 mL sealed tube was charged with amide **1a** (1 mmol), alkynylsilanes **2a** (3 mmol),  $\text{Co(acac)}_2$  (52 mg, 0.2 mmol),  $\text{Mn(acac)}_3$  (704 mg, 2 mmol),  $\text{NaOAc}$  (164 mg, 2 mmol) and  $\text{CF}_3\text{CH}_2\text{OH}$  (10 mL). The vial was evacuated and filled with  $\text{O}_2$  atmosphere for five times, and stirred at  $100\text{ }^\circ\text{C}$  for 24 h. The mixture was then cooled to room temperature, diluted with EtOAc, filtered through a celite pad, and concentrated in vacuo. The residue was purified by flash column chromatography on silica gel, eluting with EtOAc/hexane (1:5 ~ 1:2, v/v), to afford the desired product **7a** (yield = 71%).

## The H/D Exchange Experiments

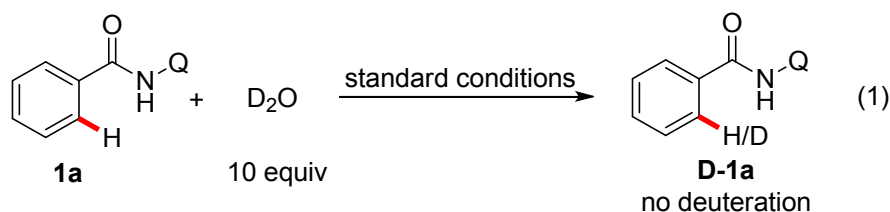

A 25 mL sealed tube was charged with amide **1a** (0.1 mmol),  $D_2O$  (20 mg, 1 mmol),  $Co(OAc)_2 \cdot 4H_2O$  (5 mg, 0.02 mmol),  $Mn(OAc)_2$  (34.6 mg, 0.2 mmol),  $CsF$  (45.6 mg, 0.3 mmol) and  $CF_3CH_2OH$  (1.0 mL). The vial was evacuated and filled with  $O_2$  atmosphere for five times, and stirred at 100 °C for 24 h. The mixture was then cooled to room temperature, diluted with EtOAc, filtered through a celite pad, and concentrated in vacuo. The residue was purified by flash column chromatography on silica gel, eluting with EtOAc/hexane (1:5, v/v), to afford the desired product **D-1a**.

### 2-methyl-*N*-(quinolin-8-yl)benzamide **1a**

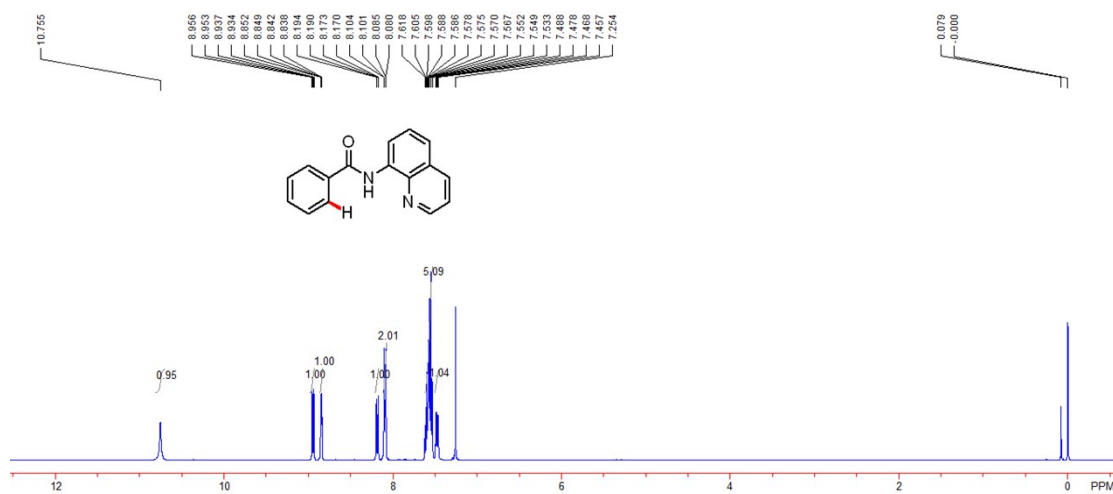

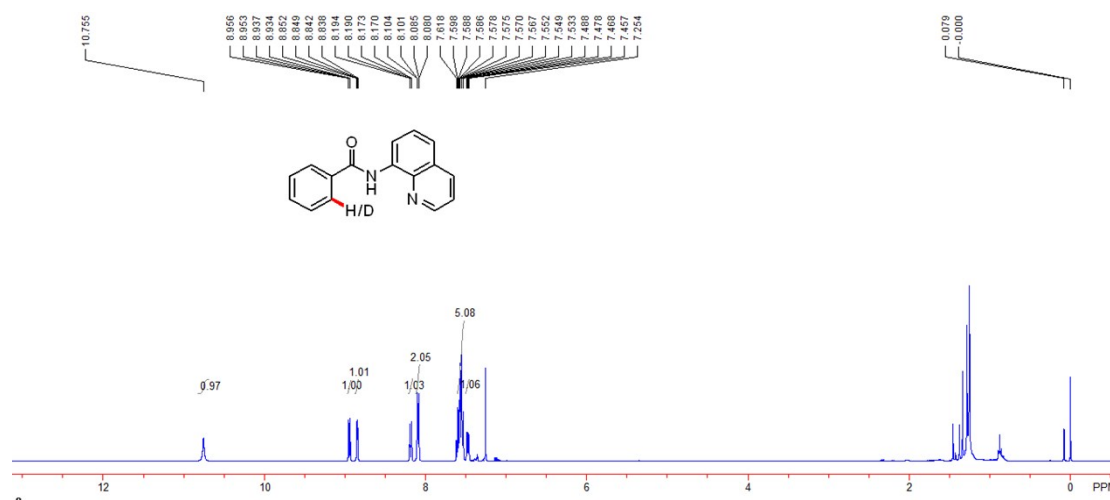

## The Kinetic Isotope Experiments

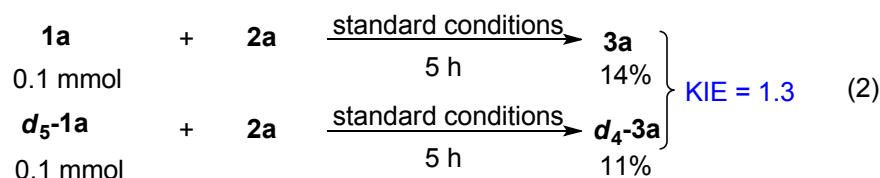

A 25 mL sealed tube was charged with amide **1a** (0.1 mmol), alkynylsilanes **2a** (0.3 mmol), Co(OAc)<sub>2</sub>·4H<sub>2</sub>O (5 mg, 0.02 mmol), Mn(OAc)<sub>2</sub> (34.6 mg, 0.2 mmol), CsF (45.6 mg, 0.3 mmol) and CF<sub>3</sub>CH<sub>2</sub>OH (1.0 mL). The vial was evacuated and filled with O<sub>2</sub> atmosphere for five times, and stirred at 100 °C for 5 h. The mixture was then cooled to room temperature, diluted with EtOAc, filtered through a celite pad, and concentrated in vacuo. The residue was purified by flash column chromatography on silica gel, eluting with EtOAc/hexane (1:5 ~ 1:1, v/v), to afford the desired product **3a** (yield = 14%).

A 25 mL sealed tube was charged with amide **d<sub>5</sub>-1a** (0.1 mmol), alkynylsilanes **2a** (0.3 mmol), Co(OAc)<sub>2</sub>·4H<sub>2</sub>O (5 mg, 0.02 mmol), Mn(OAc)<sub>2</sub> (34.6 mg, 0.2 mmol), CsF (45.6 mg, 0.3 mmol) and CF<sub>3</sub>CH<sub>2</sub>OH (1.0 mL). The vial was evacuated and filled with O<sub>2</sub> atmosphere for five times, and stirred at 100 °C for 5 h. The mixture was then cooled to room temperature, diluted with EtOAc, filtered through a celite pad, and concentrated in vacuo. The residue was purified by flash column chromatography on silica gel, eluting with EtOAc/hexane (1:5 ~ 1:1, v/v), to afford the desired product

***d*<sub>4</sub>-3a** (yield = 11%).

***d*<sub>5</sub>-1a**

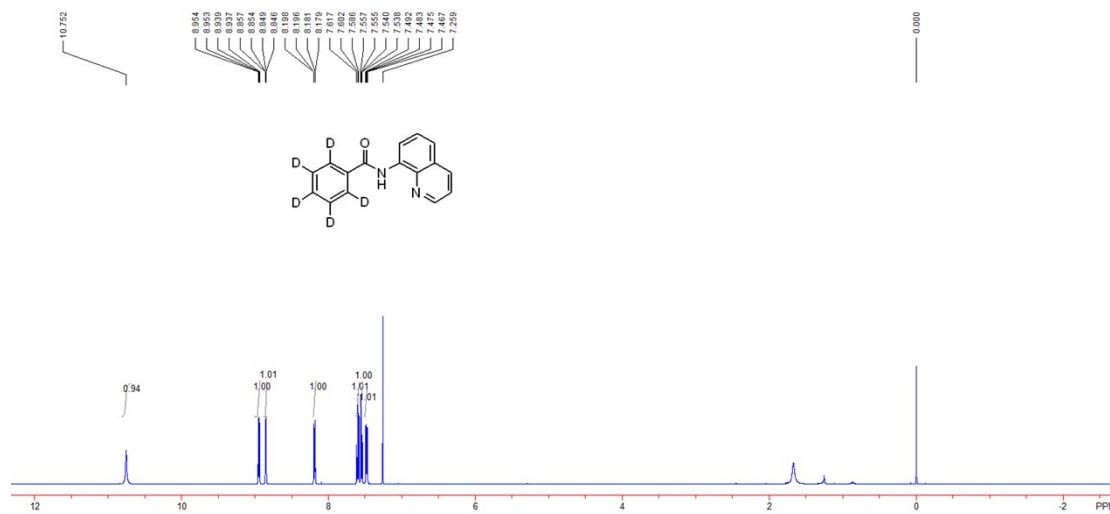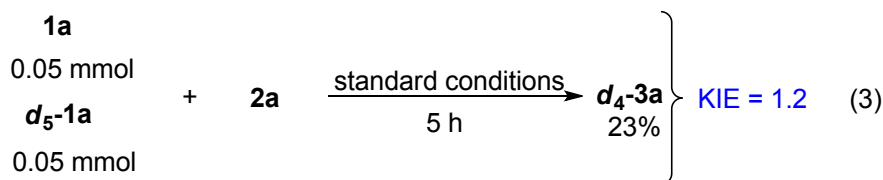

A 25 mL sealed tube was charged with amide **1a** (0.05 mmol), amide ***d*<sub>5</sub>-1a** (0.05 mmol), alkynylsilanes **2a** (0.3 mmol), Co(OAc)<sub>2</sub>·4H<sub>2</sub>O (5 mg, 0.02 mmol), Mn(OAc)<sub>2</sub> (34.6 mg, 0.2 mmol), CsF (45.6 mg, 0.3 mmol) and CF<sub>3</sub>CH<sub>2</sub>OH (1.0 mL). The vial was evacuated and filled with O<sub>2</sub> atmosphere for five times, and stirred at 100 °C for 5 h. The mixture was then cooled to room temperature, diluted with EtOAc, filtered through a celite pad, and concentrated in vacuo. The residue was purified by flash column chromatography on silica gel, eluting with EtOAc/hexane (1:5 ~ 1:1, v/v), to afford the desired product **3a** and ***d*<sub>4</sub>-3a** (yield = 23%).

***d*<sub>4</sub>-3d**

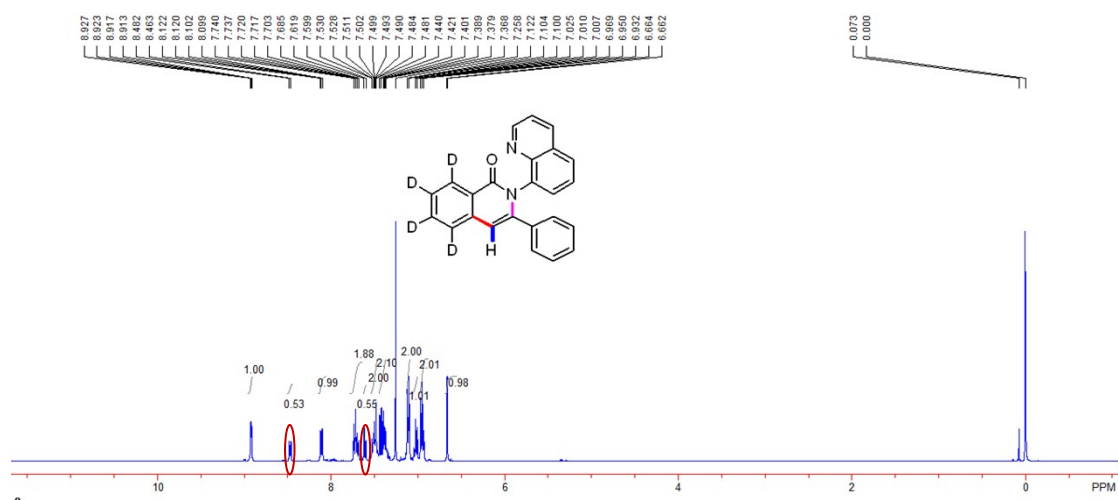

## References

1. L. D. Tran, I. Popov and O. Daugulis, *J. Am. Chem. Soc.*, 2012, **134**, 18237.
2. L. Grigorjeva and O. Daugulis, *Angew. Chem., Int. Ed.*, 2014, **53**, 10209
3. Y. Ano, M. Tobisu and N. Chatani, *Org. Lett.*, 2012, **14**, 354.
4. X. Cong, Y. Li, Y. Wei and X. Zeng, *Org. Lett.*, 2014, **16**, 3926.

# Copies of $^1\text{H}$ and $^{13}\text{C}$ NMR Spectra

## 3-phenyl-2-(quinolin-8-yl)isoquinolin-1(2H)-one (3a)

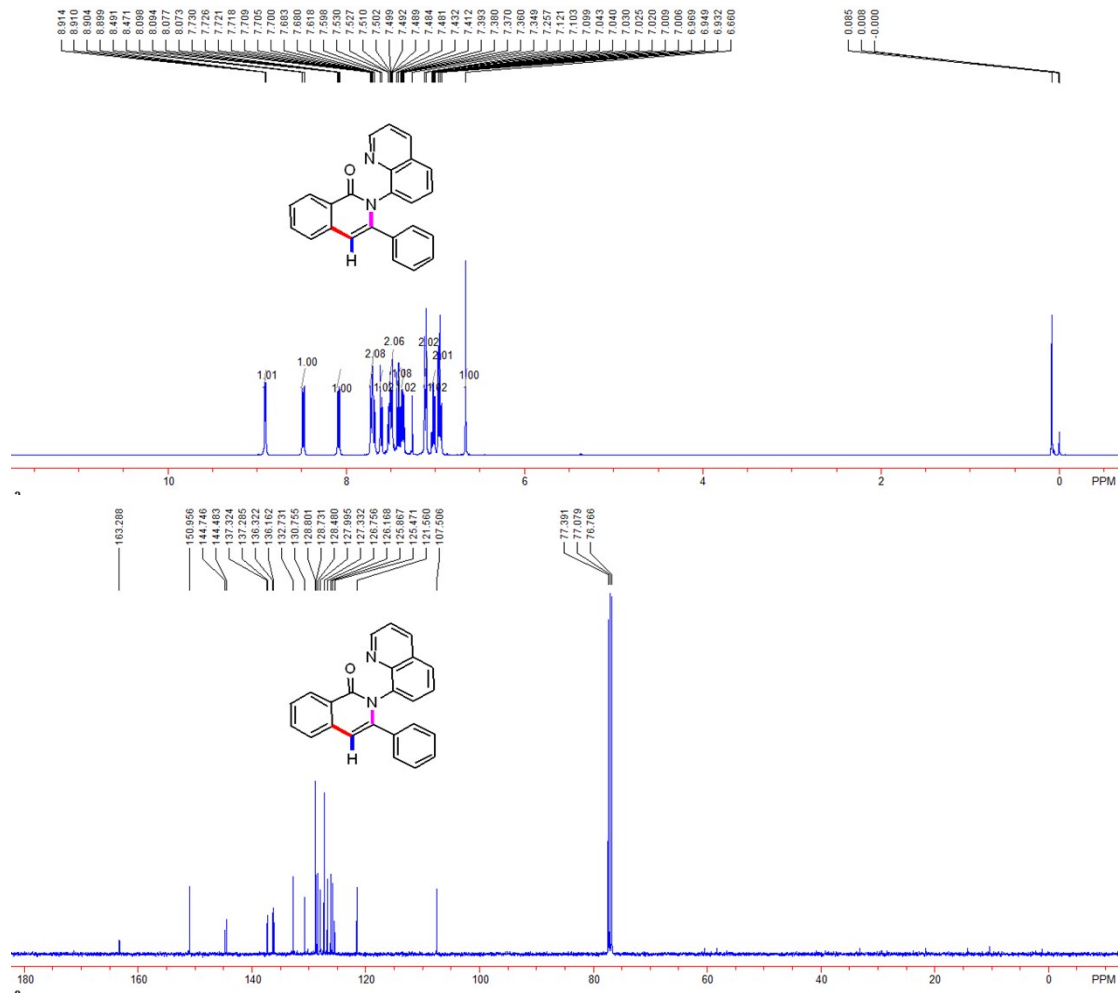

### 3-(4-bromophenyl)-2-(quinolin-8-yl)isoquinolin-1(2H)-one (3b)

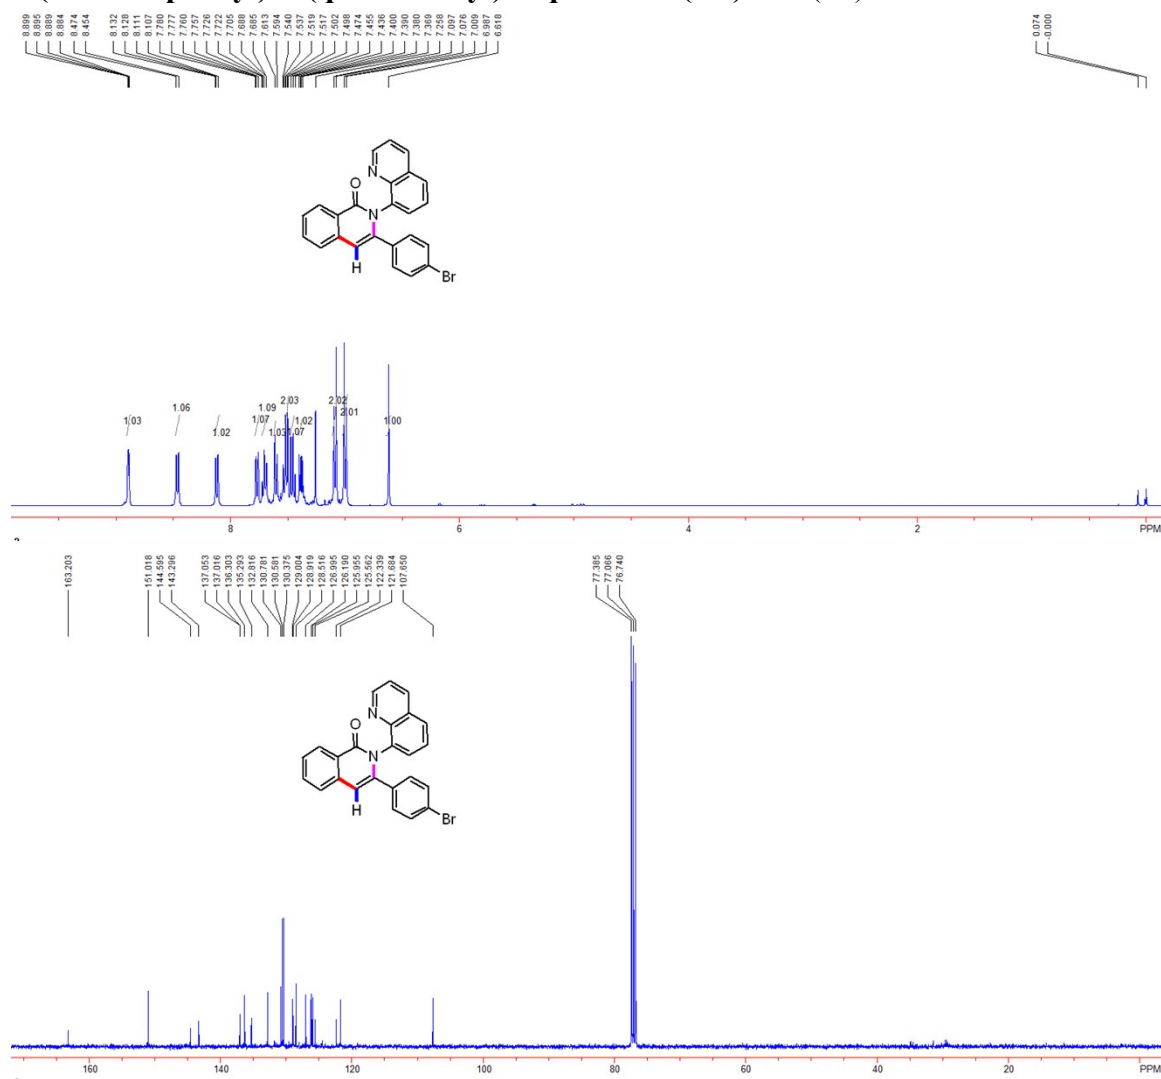





### 3-cyclohexyl-2-(quinolin-8-yl)isoquinolin-1(2H)-one (3d)

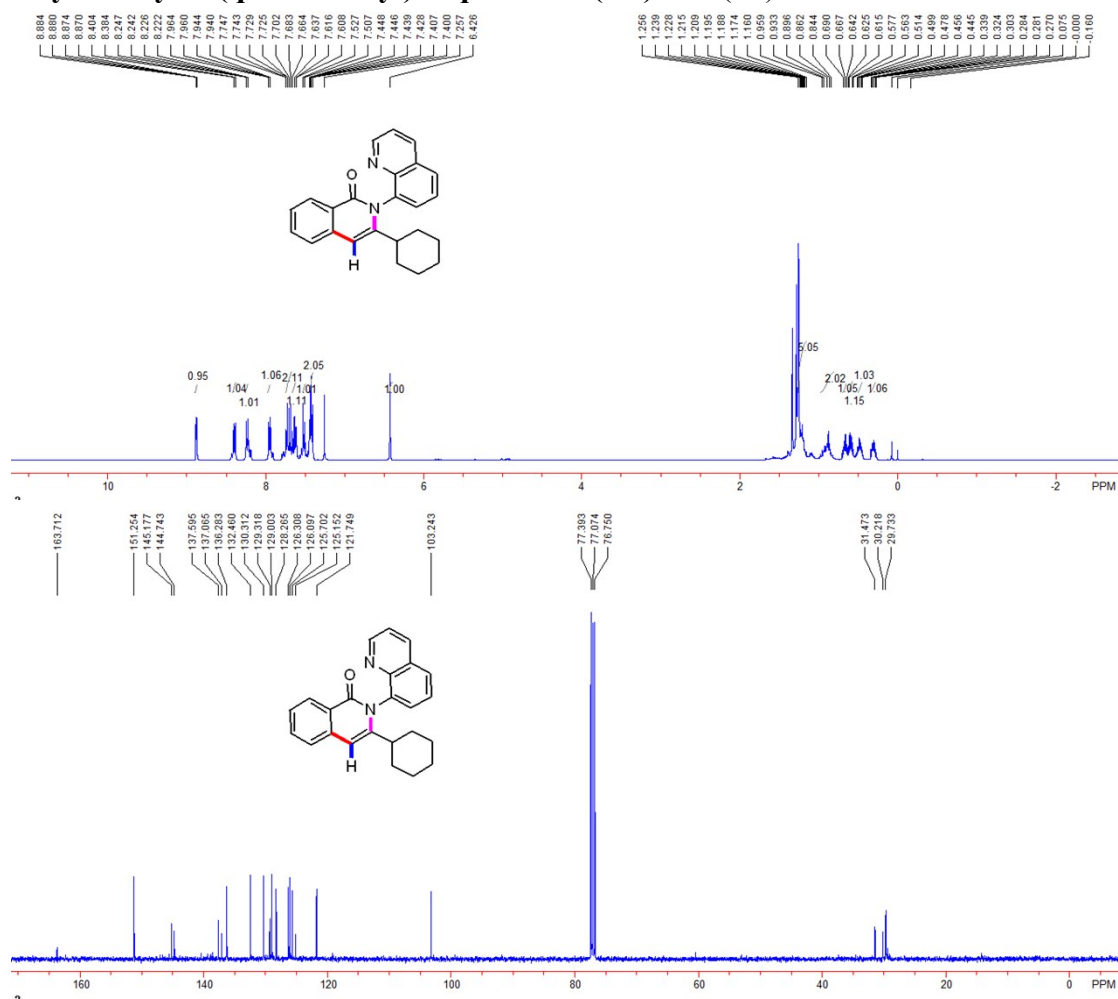

### 3-methyl-2-(quinolin-8-yl)isoquinolin-1(2H)-one (3e)

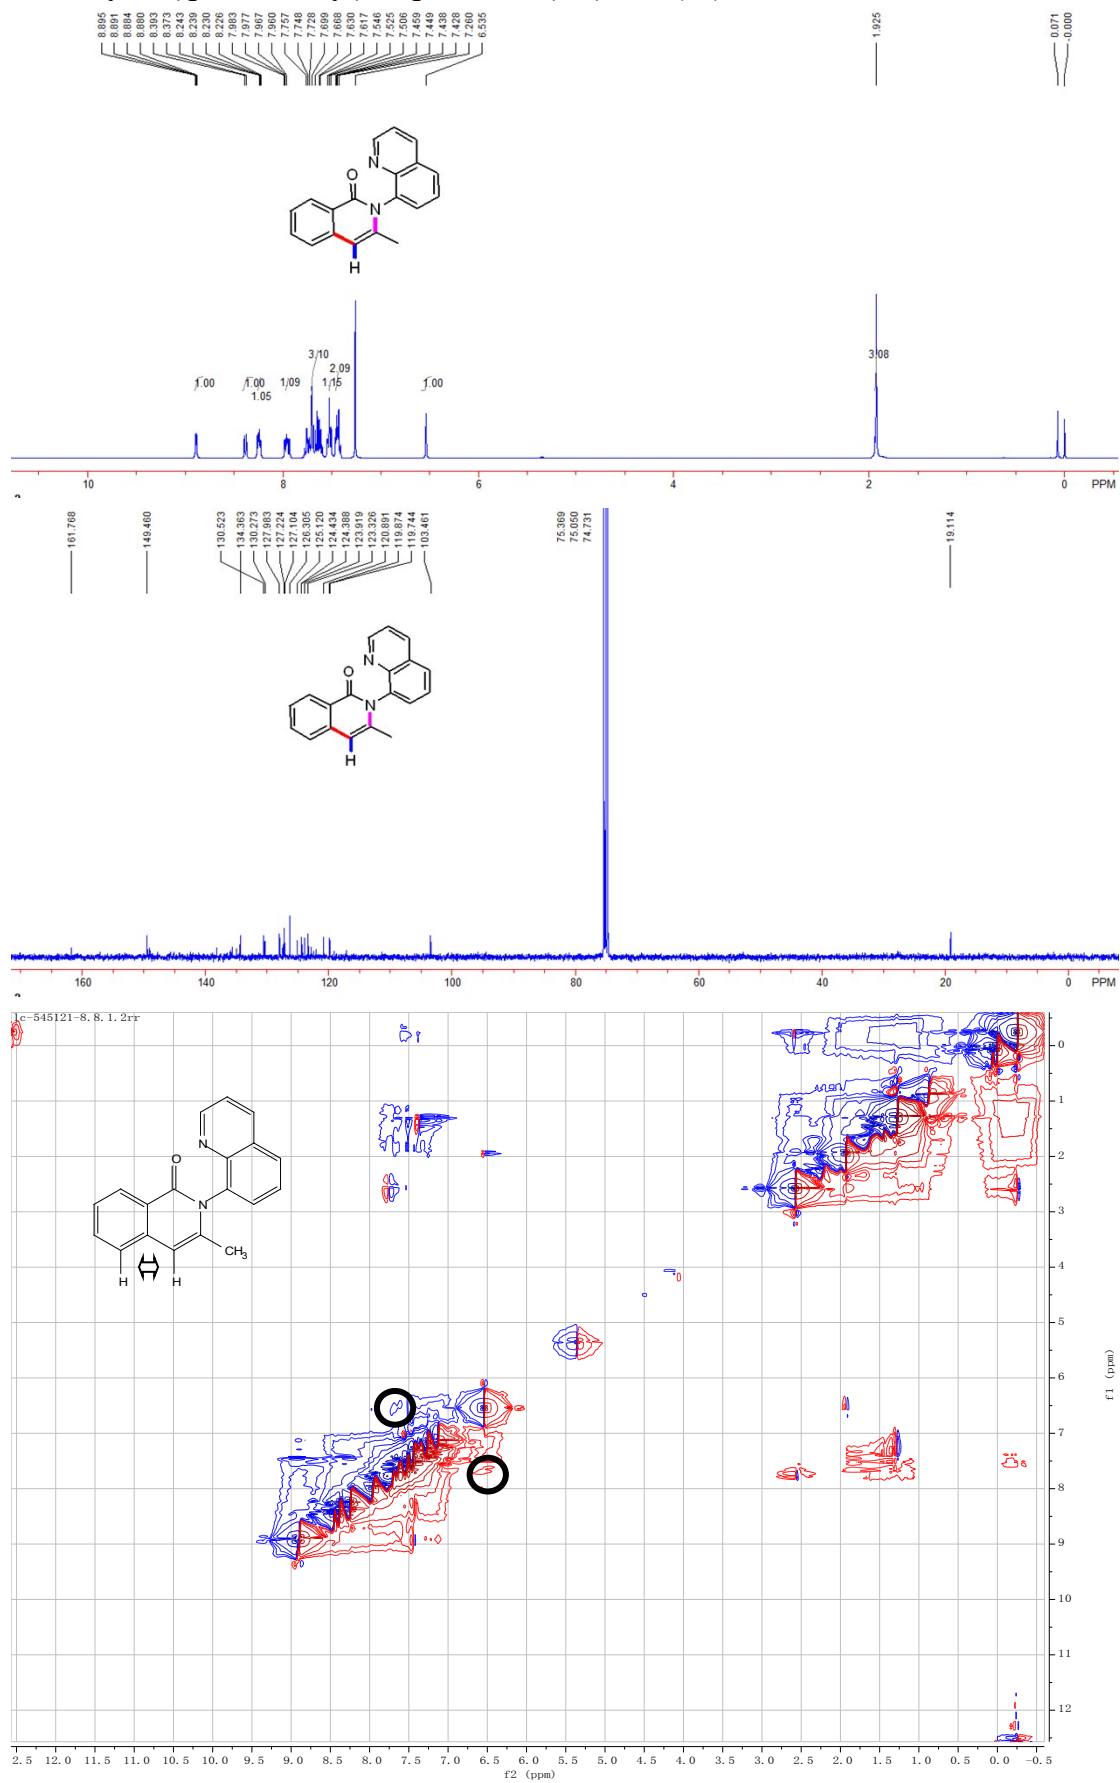

# 2-(quinolin-8-yl)-3-(trimethylsilyl)isoquinolin-1(2H)-one (3f)

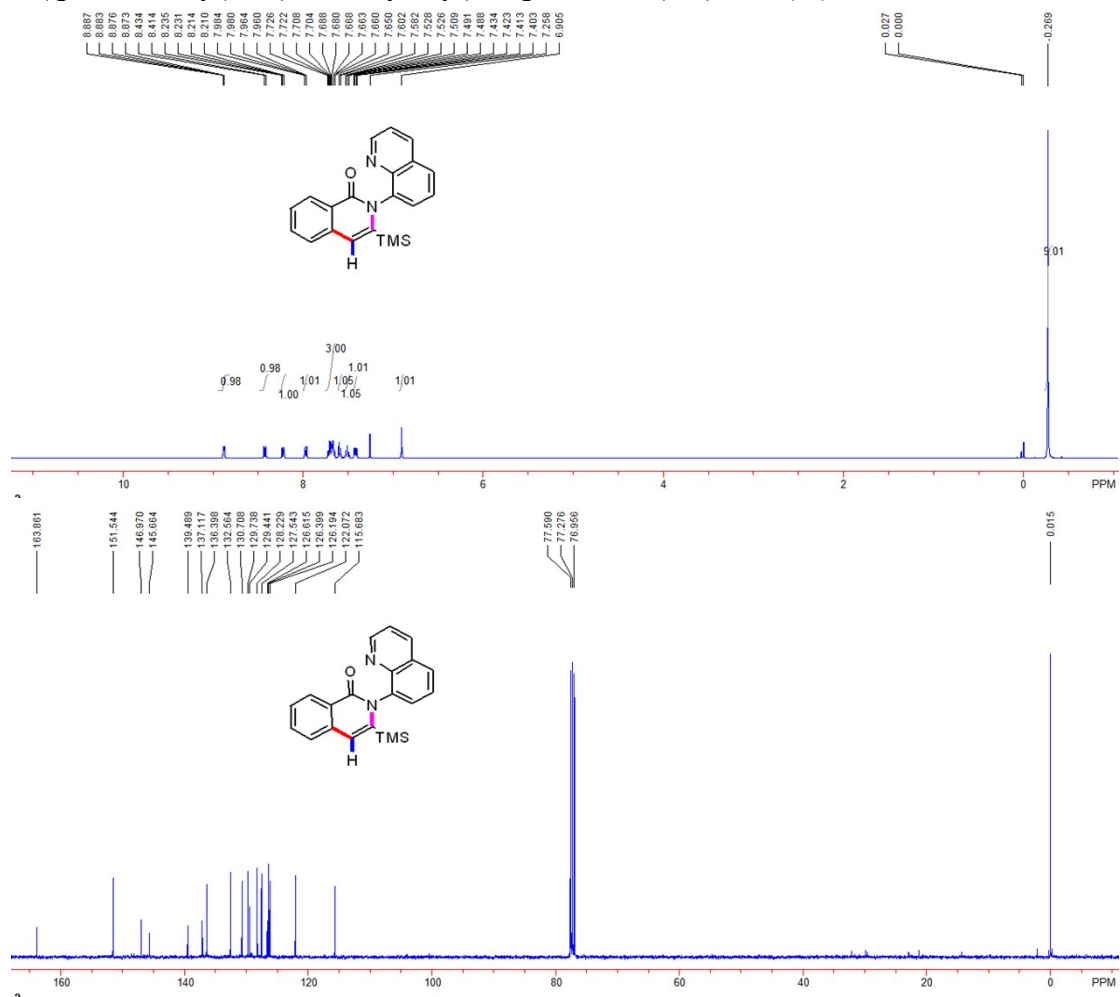

# 8-methyl-3-phenyl-2-(quinolin-8-yl)isoquinolin-1(2H)-one (4a)

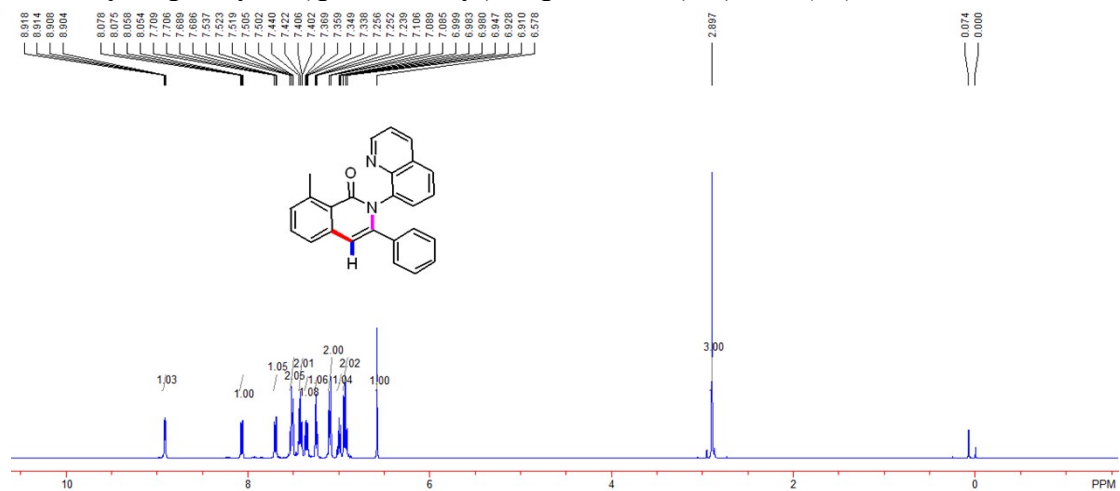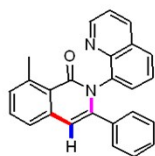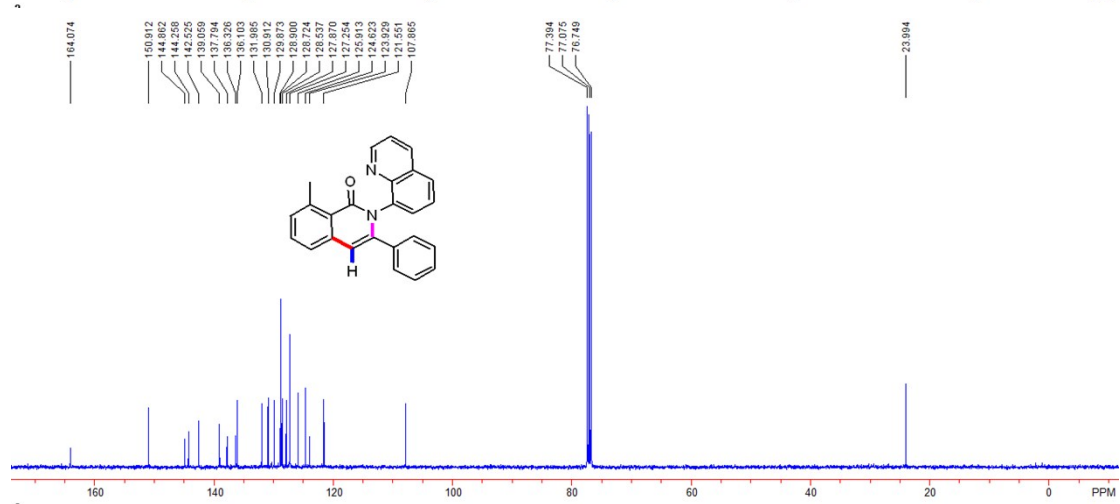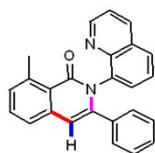

**7-methyl-3-phenyl-2-(quinolin-8-yl)isoquinolin-1(2H)-one (4b)**

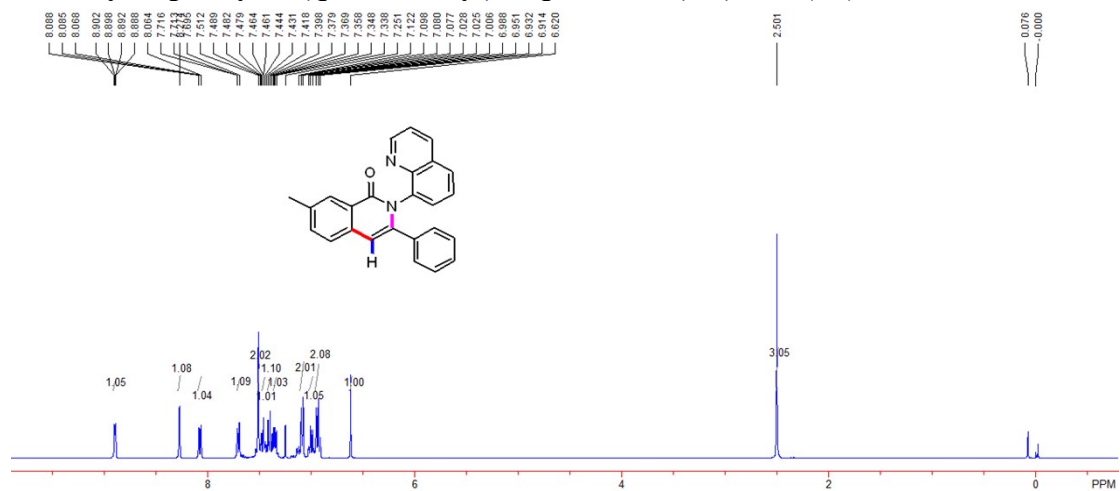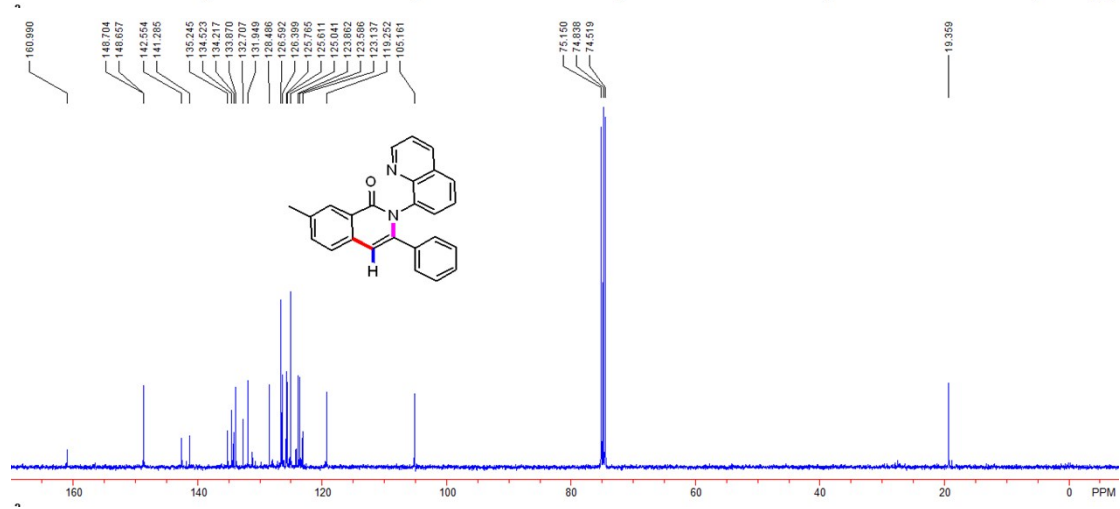

# 6-methyl-3-phenyl-2-(quinolin-8-yl)isoquinolin-1(2H)-one (4c)

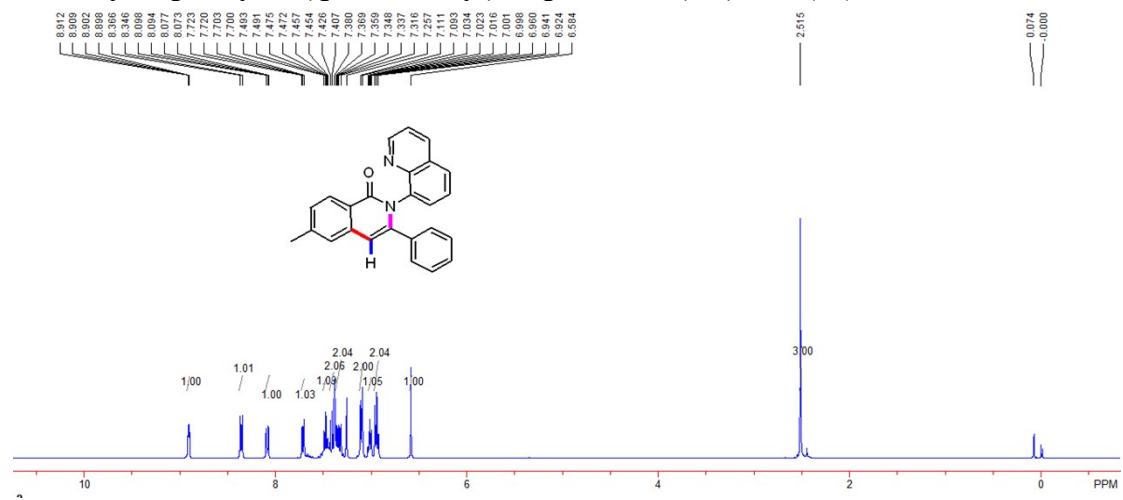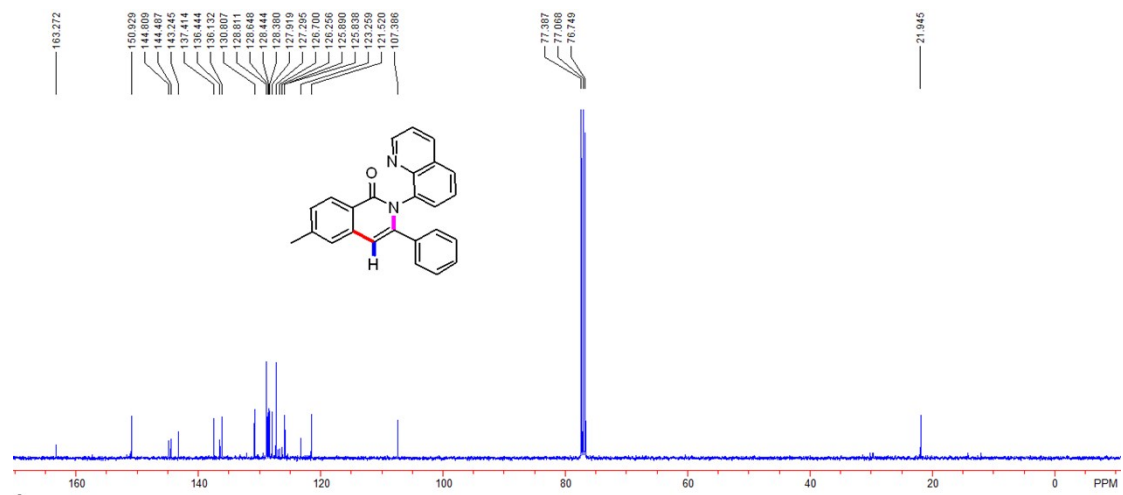

# 6-methoxy-3-phenyl-2-(quinolin-8-yl)isoquinolin-1(2H)-one (4d)

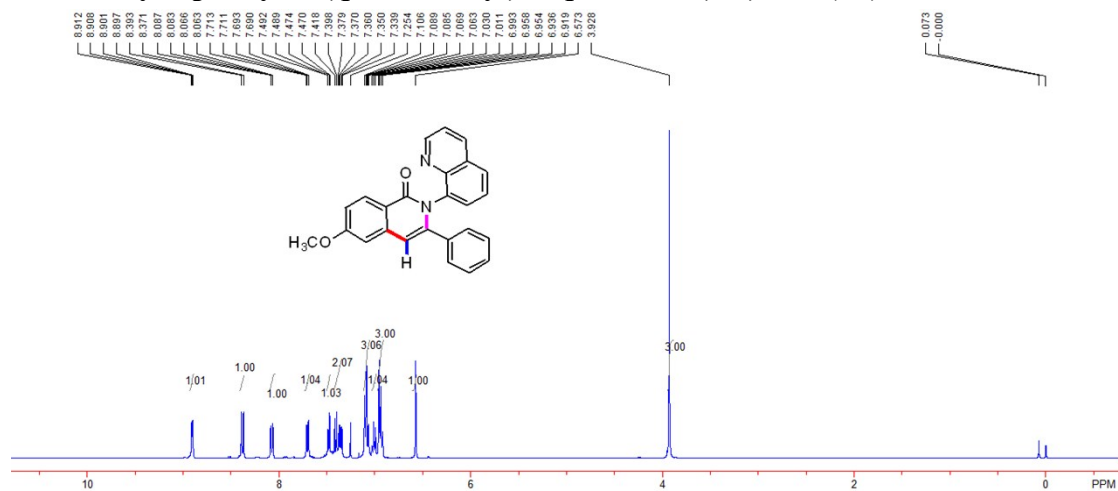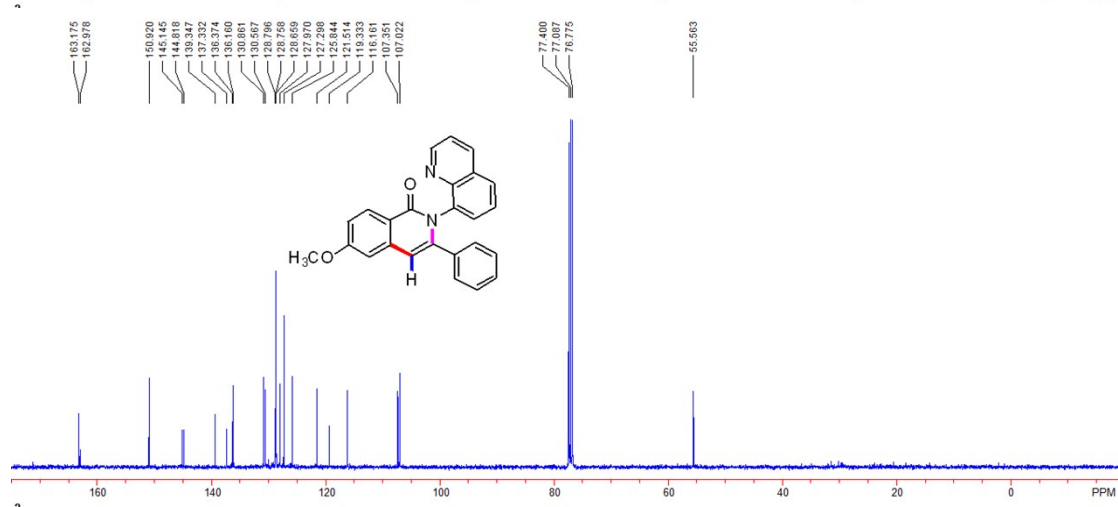



**6-(tert-butyl)-3-phenyl-2-(quinolin-8-yl)isoquinolin-1(2H)-one (4e)**

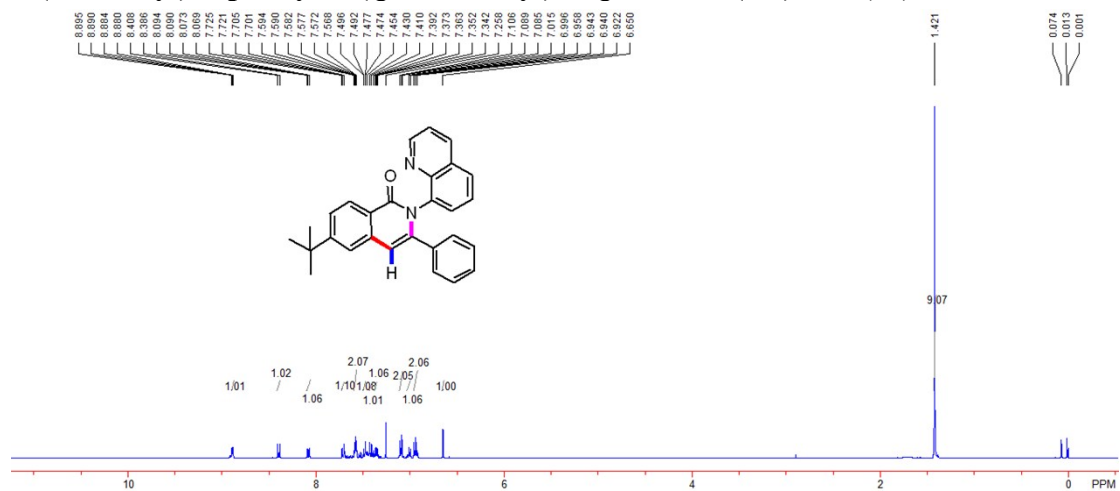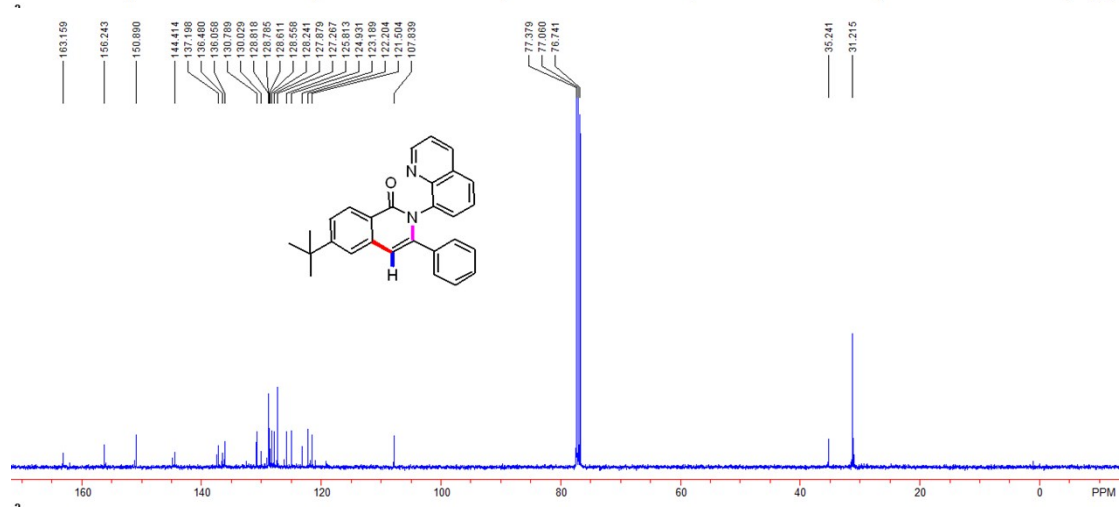

# 6,7-dimethoxy-3-phenyl-2-(quinolin-8-yl)isoquinolin-1(2H)-one (4f)

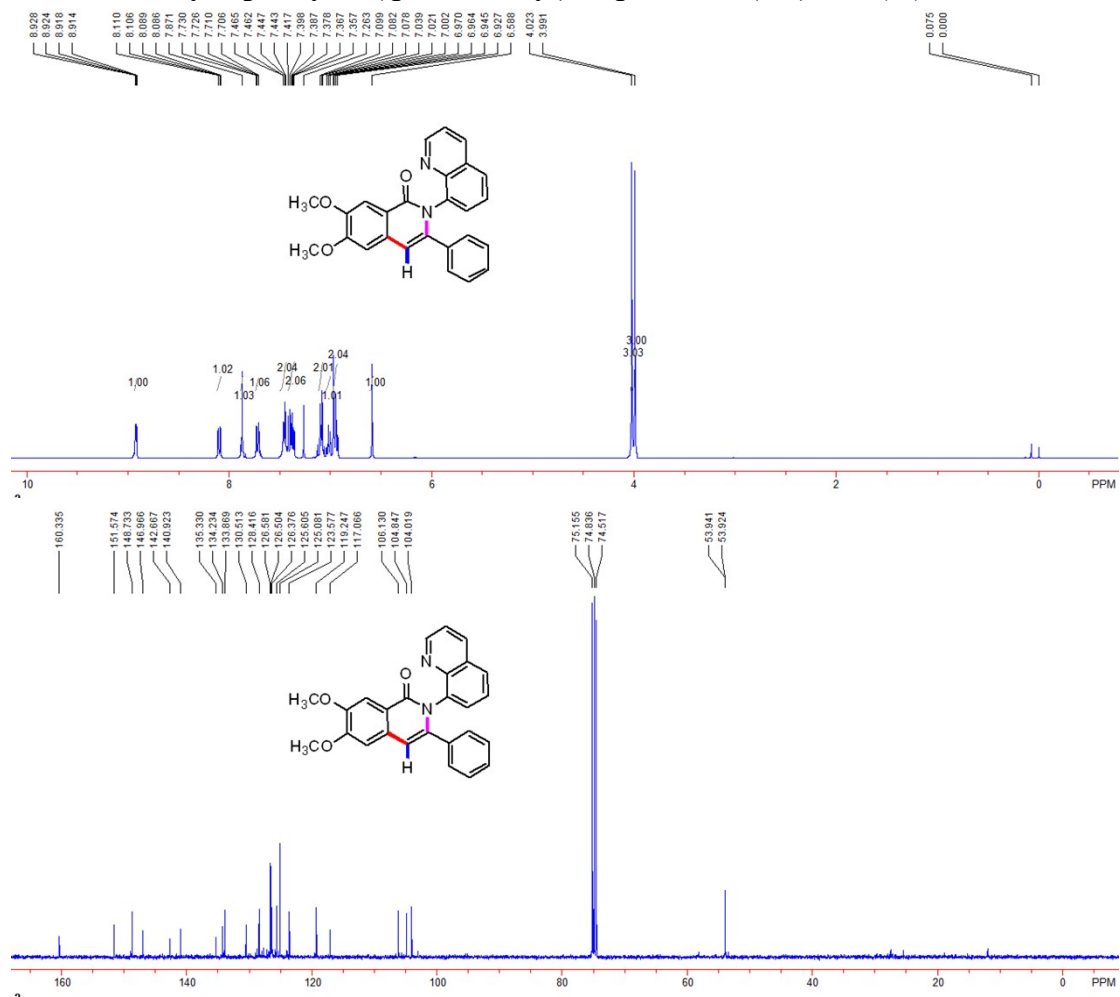

# 7-iodo-3-phenyl-2-(quinolin-8-yl)isoquinolin-1(2H)-one (4g)

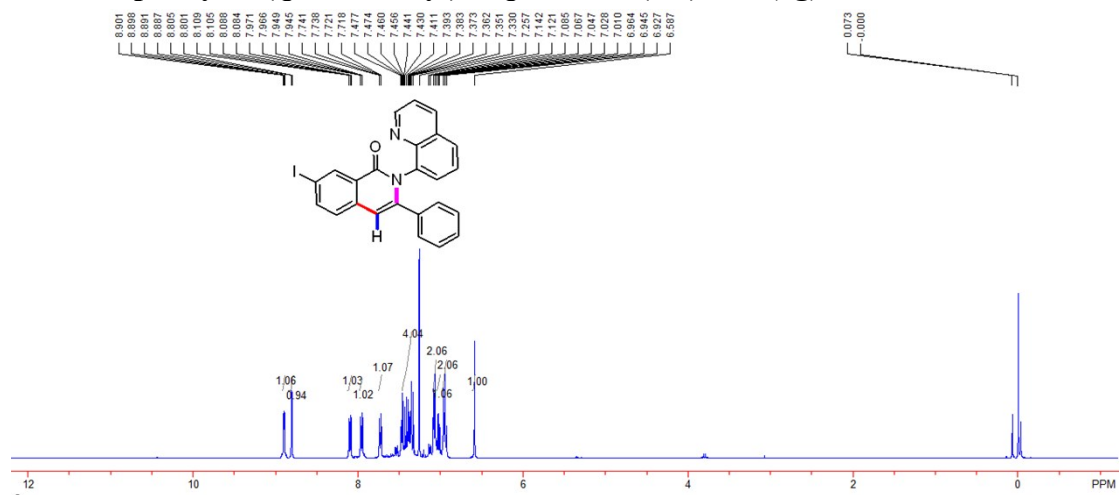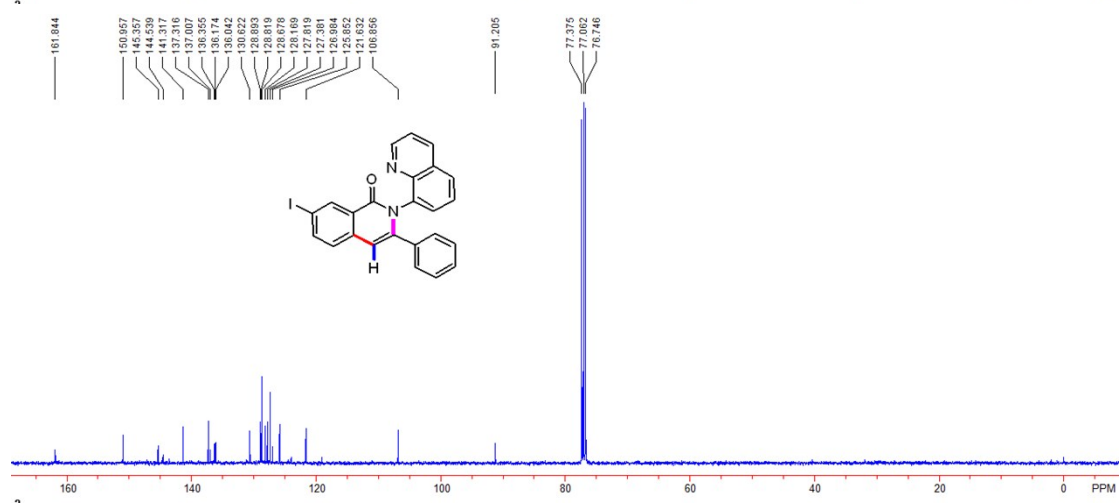

7-bromo-3-phenyl-2-(quinolin-8-yl)isoquinolin-1(2H)-one (4h)

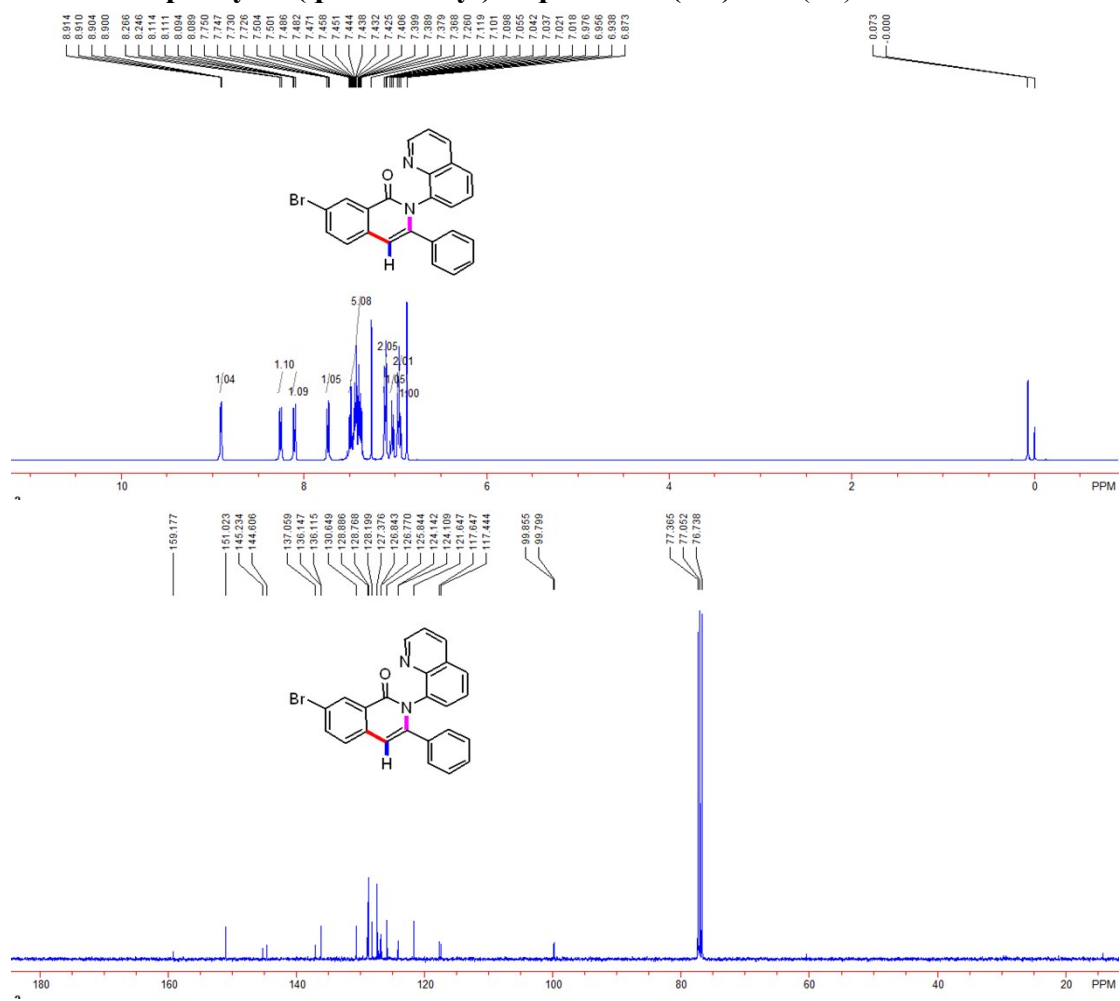

# 6-chloro-3-phenyl-2-(quinolin-8-yl)isoquinolin-1(2H)-one (4i)

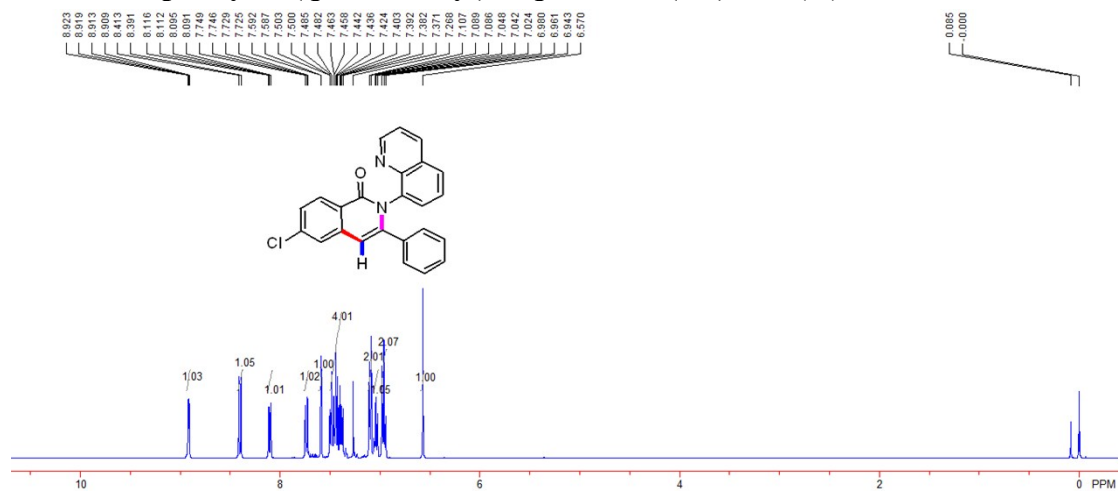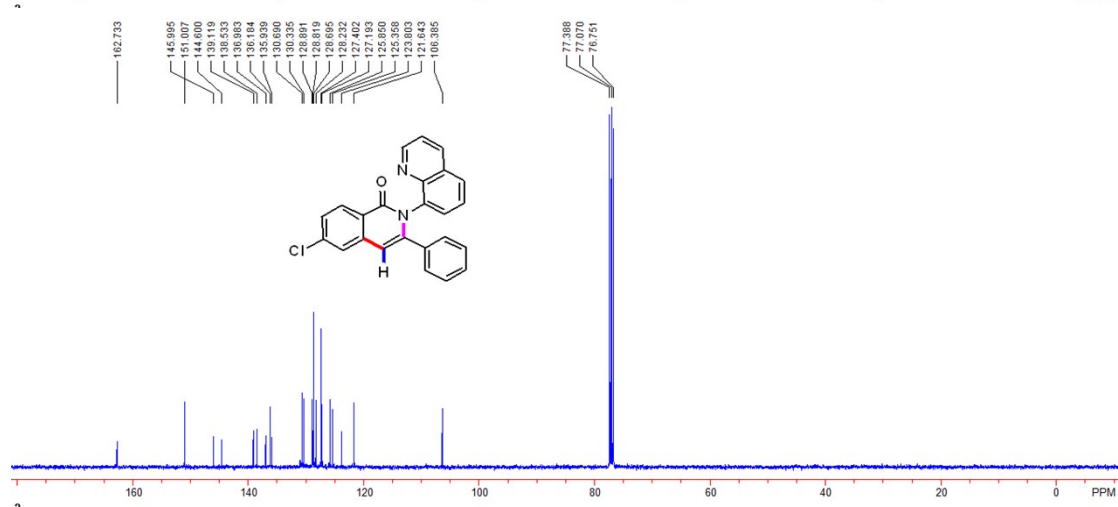

# 7-chloro-3-phenyl-2-(quinolin-8-yl)isoquinolin-1(2H)-one (4j)

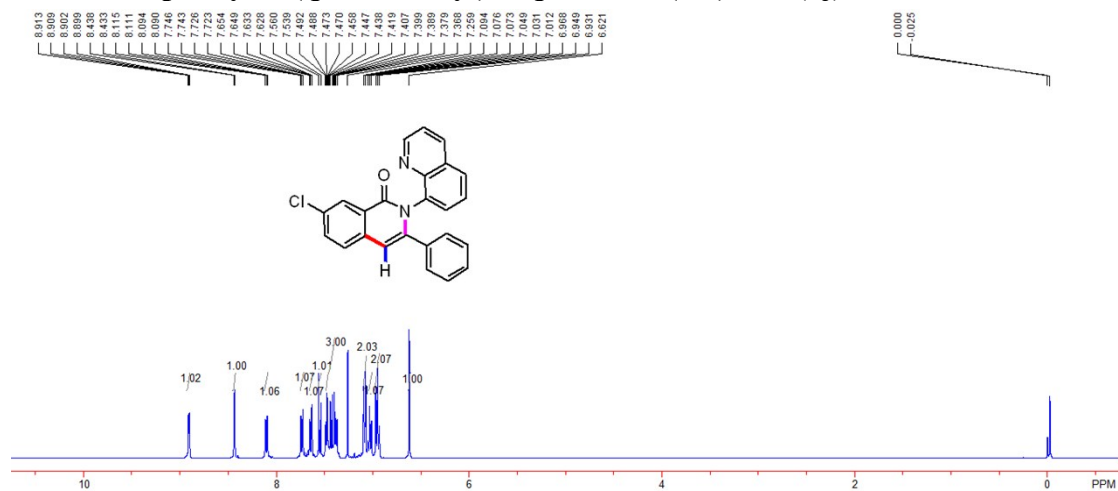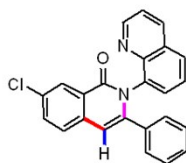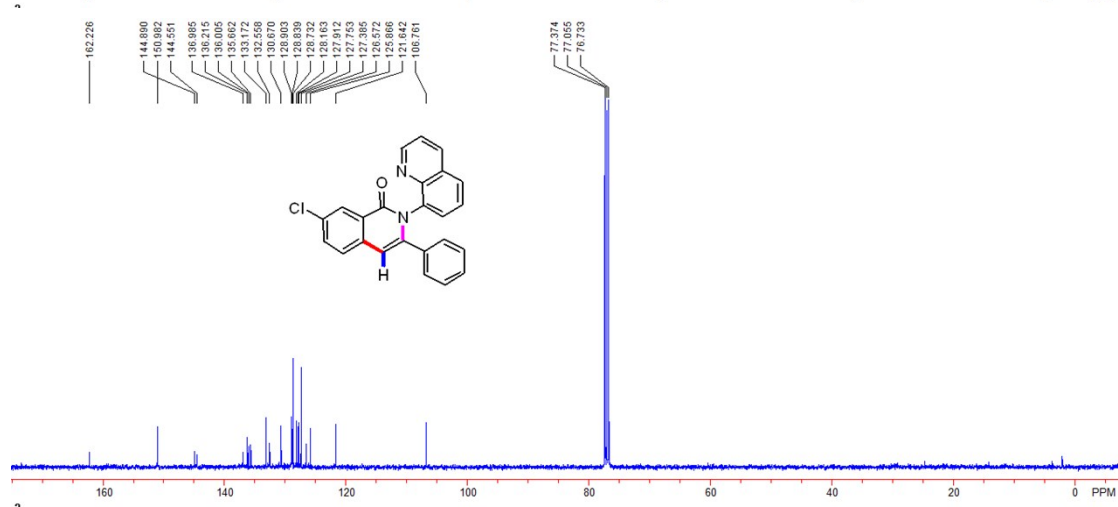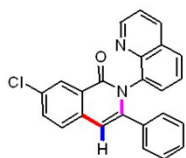

**8-chloro-3-phenyl-2-(quinolin-8-yl)isoquinolin-1(2H)-one (4k)**

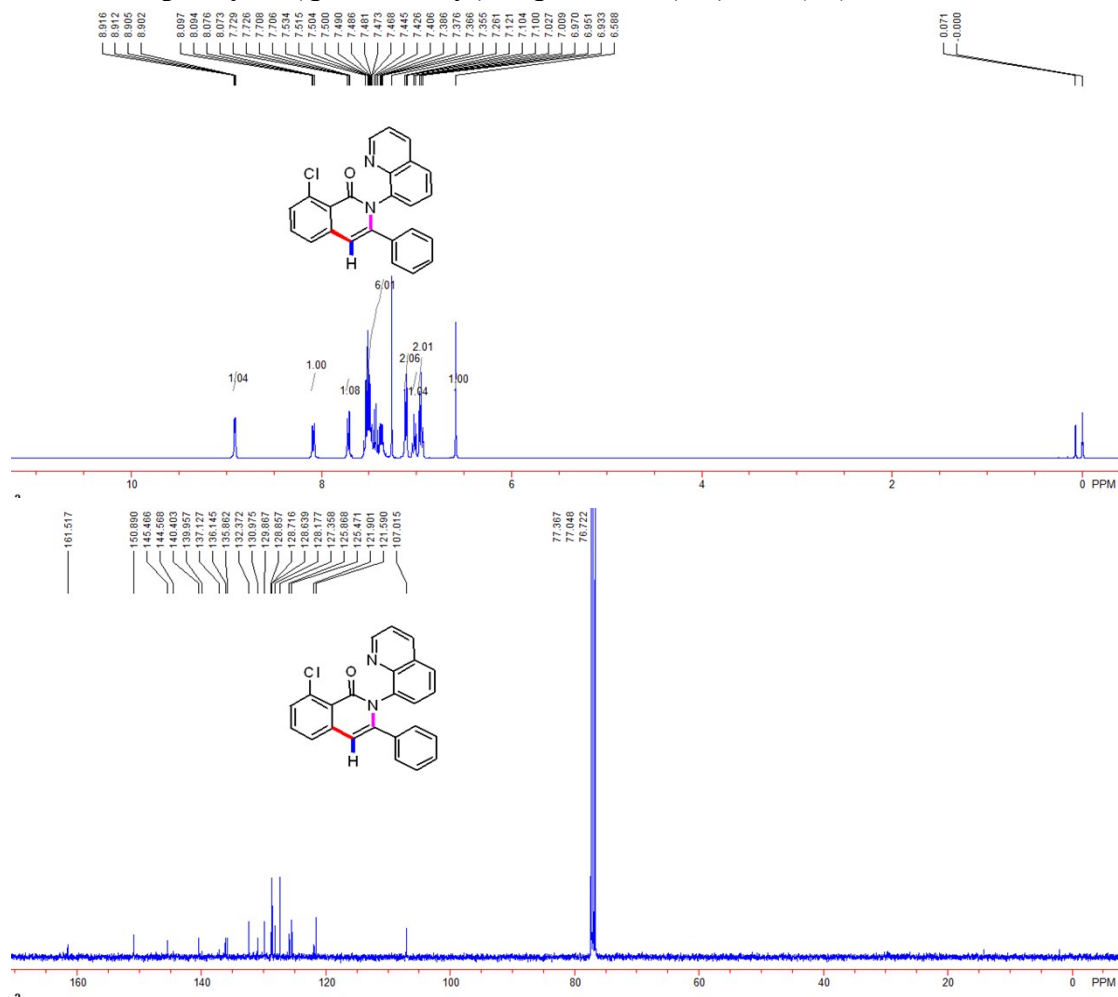

# 5-fluoro-3-phenyl-2-(quinolin-8-yl)isoquinolin-1(2H)-one

(41)

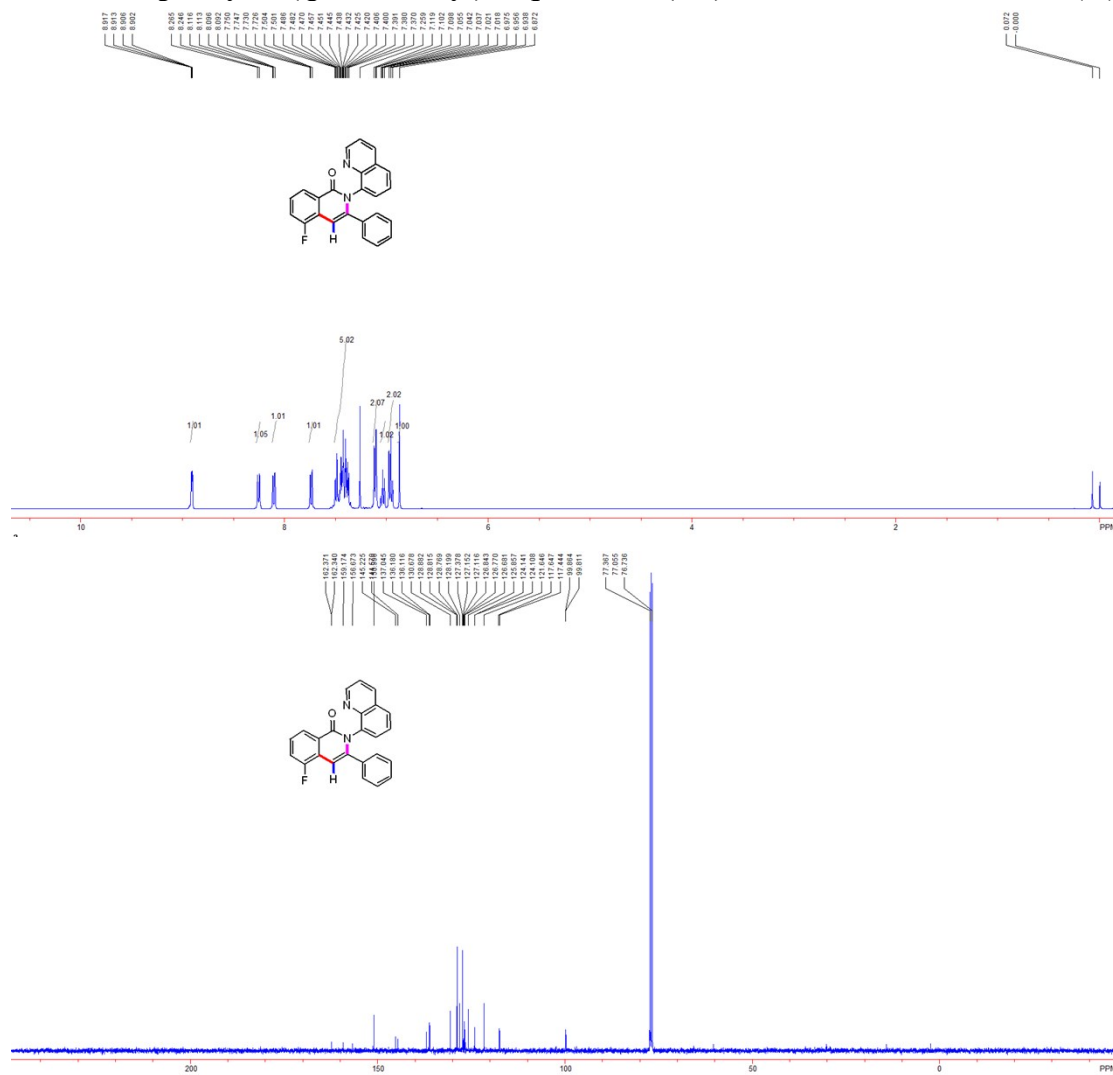



### 3-phenyl-2-(quinolin-8-yl)benzo[h]isoquinolin-1(2H)-one (4m)

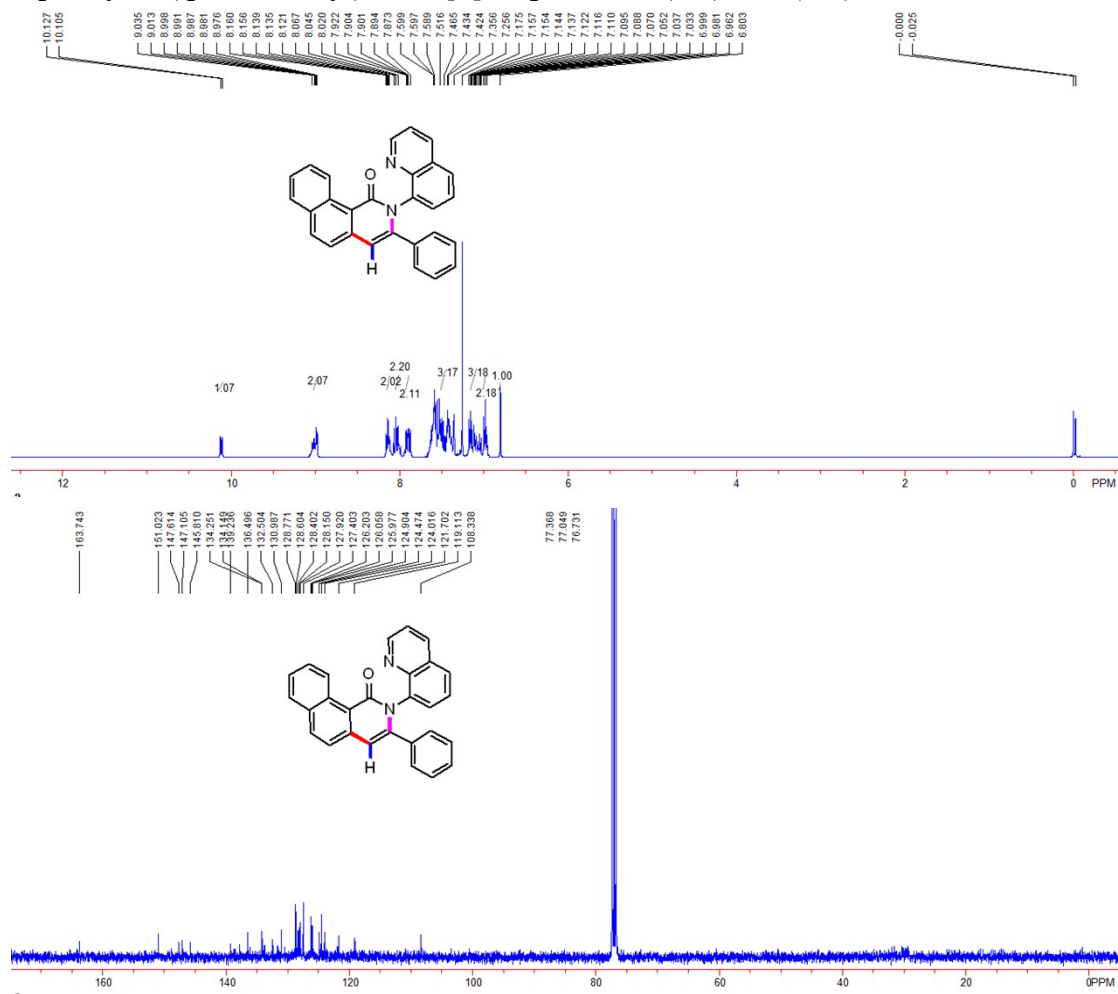

# 3-phenyl-2-(quinolin-8-yl)benzo[g]isoquinolin-1(2H)-one (4n)

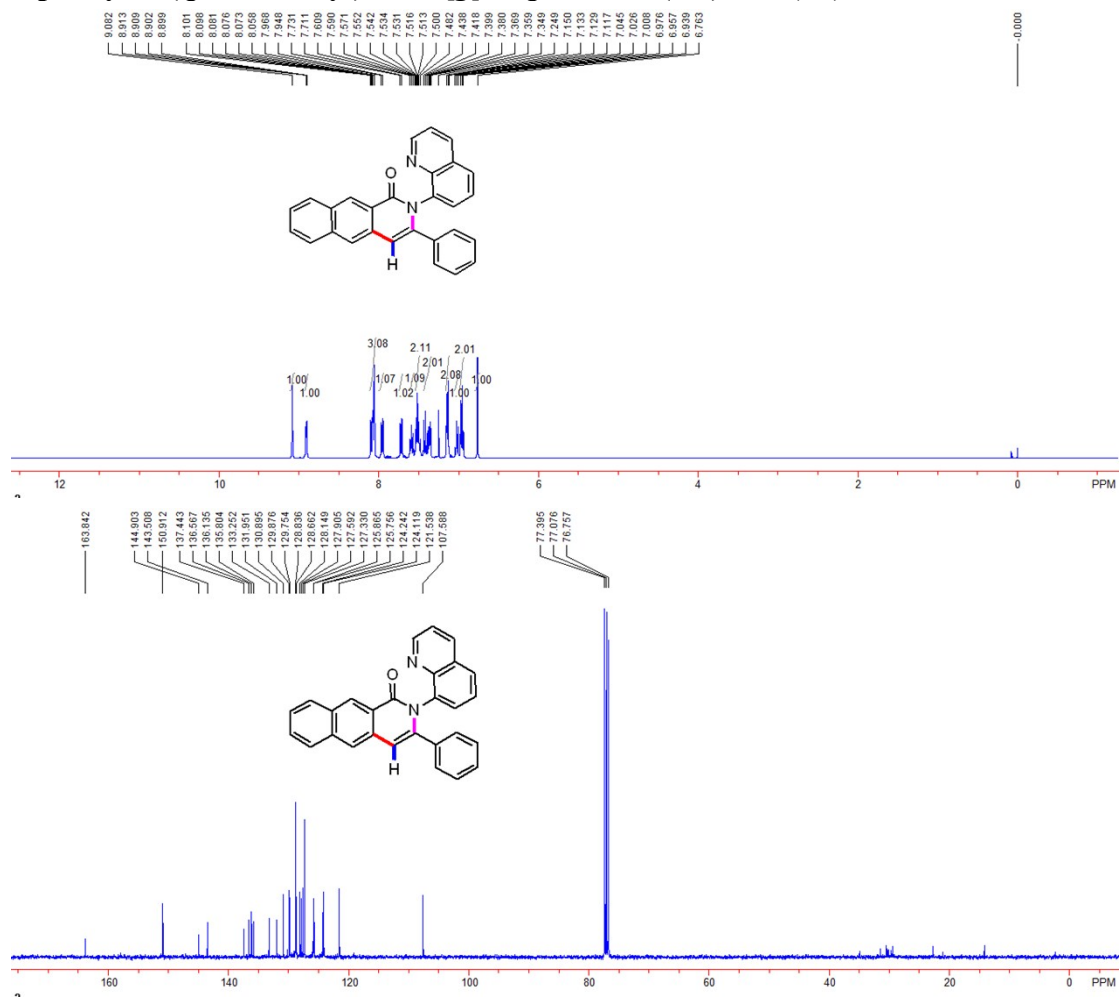

# 5-phenyl-6-(quinolin-8-yl)thieno[2,3-c]pyridin-7(6H)-one (4o)

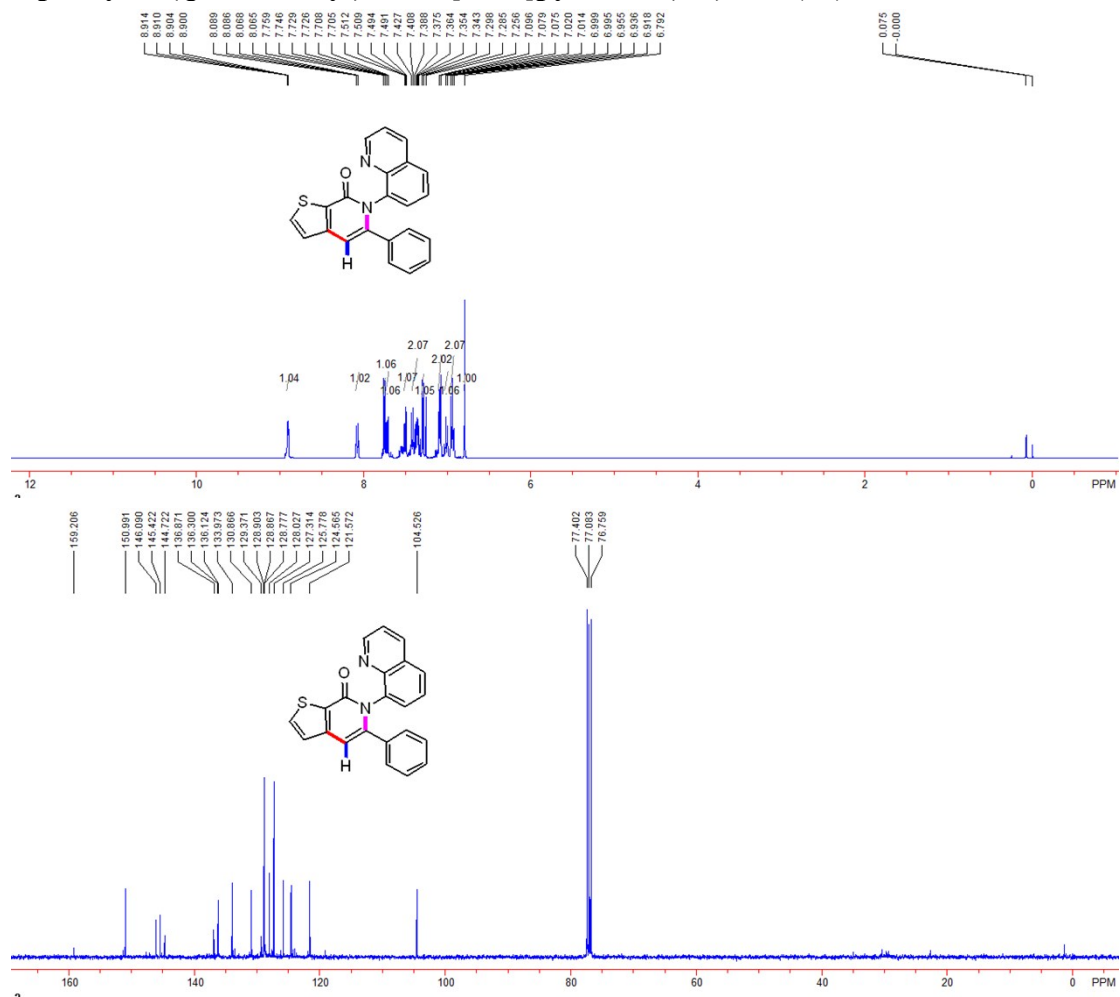

# 5-phenyl-6-(quinolin-8-yl)furo[2,3-c]pyridin-7(6H)-one (4p)

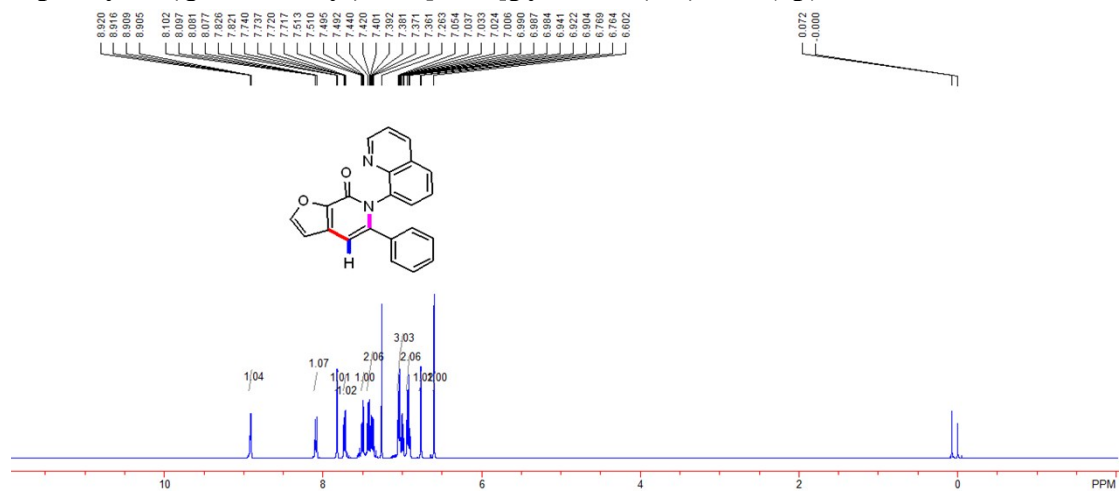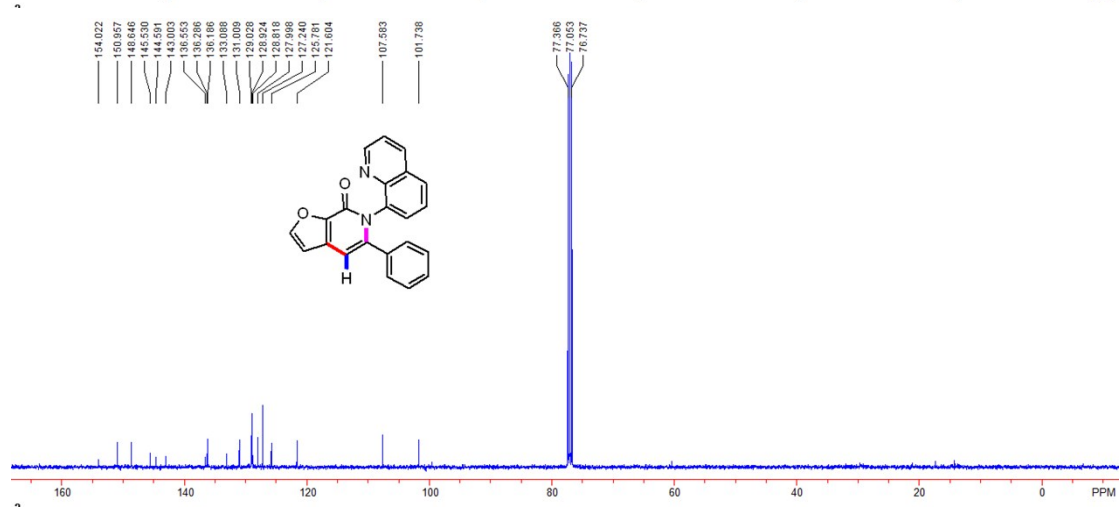

### 3-phenyl-2-(quinolin-8-yl)-5,6,7,8-tetrahydroisoquinolin-1(2H)-one (6a)

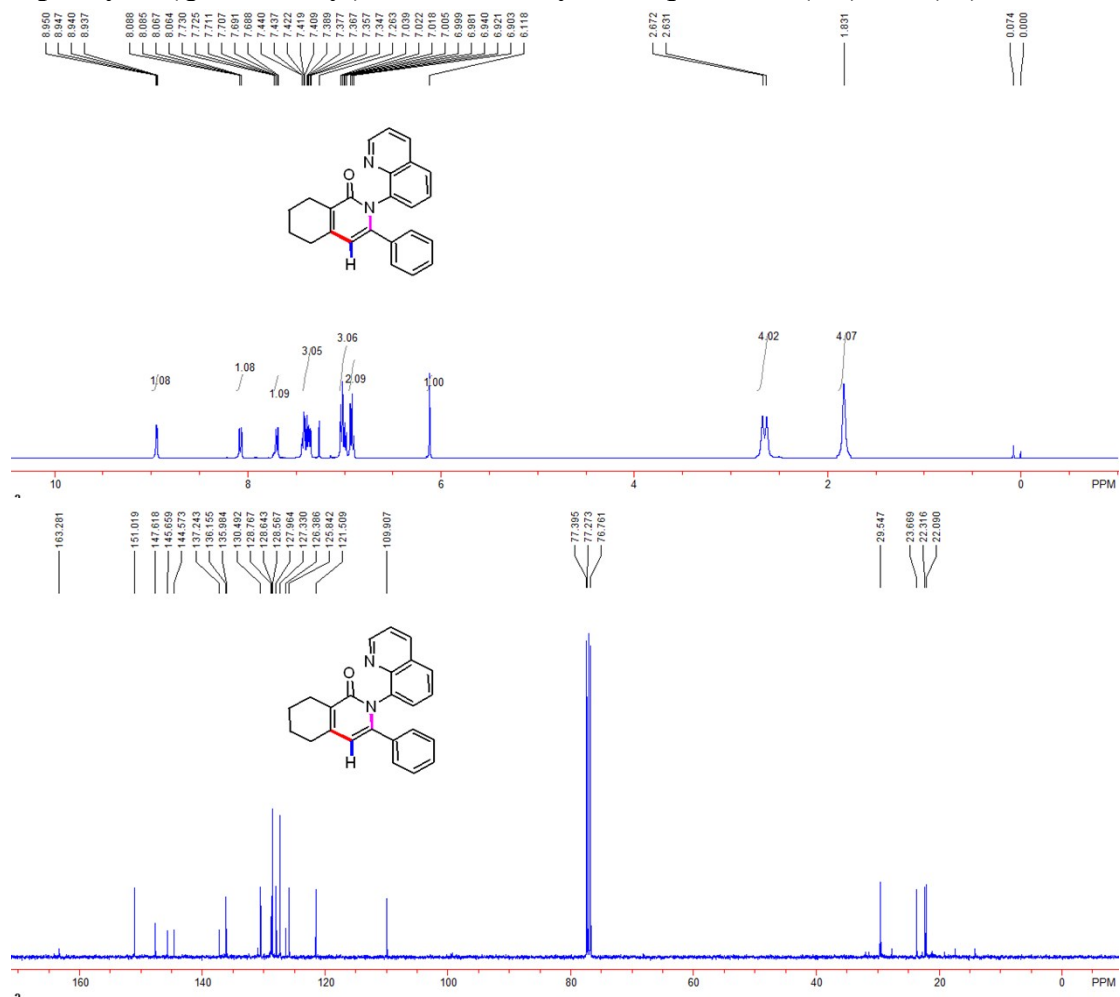

### 3,4-dimethyl-6-phenyl-1-(quinolin-8-yl)pyridin-2(1H)-one (6b)

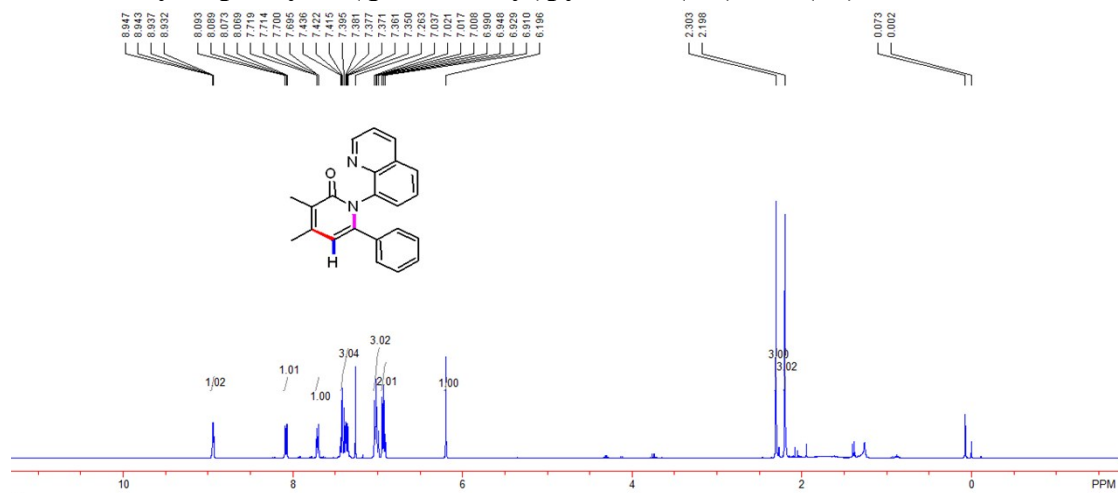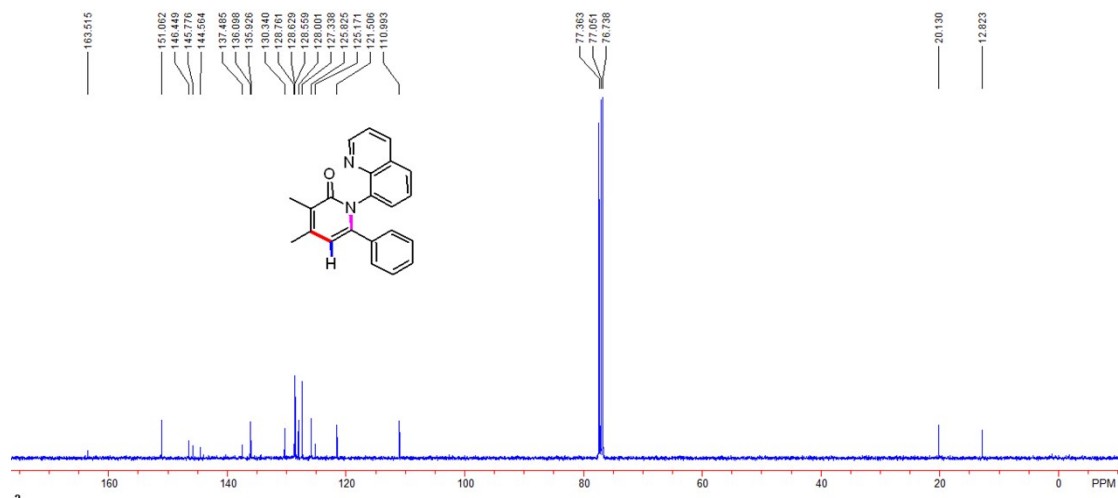

4-ethyl-3-methyl-6-phenyl-1-(quinolin-8-yl)pyridin-2(1H)-one

(6c)

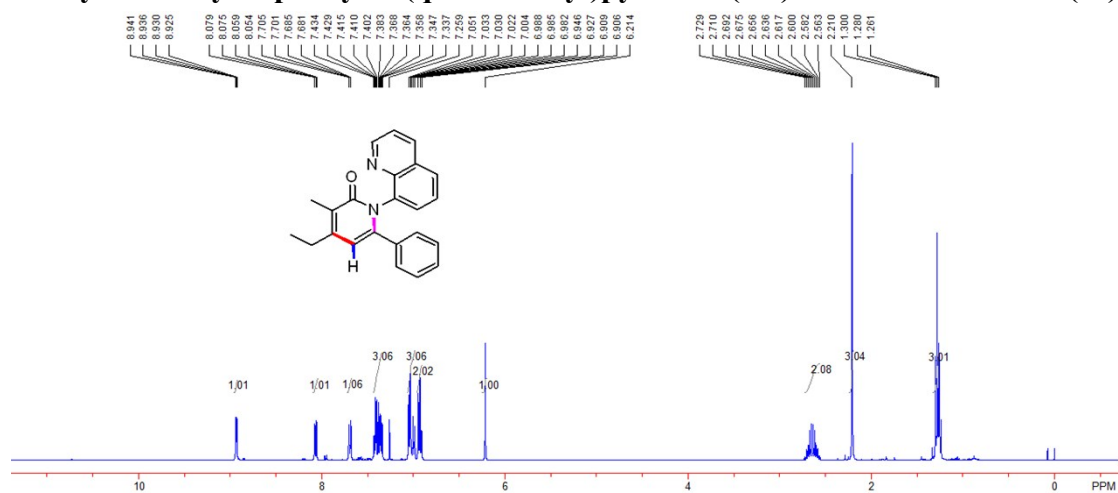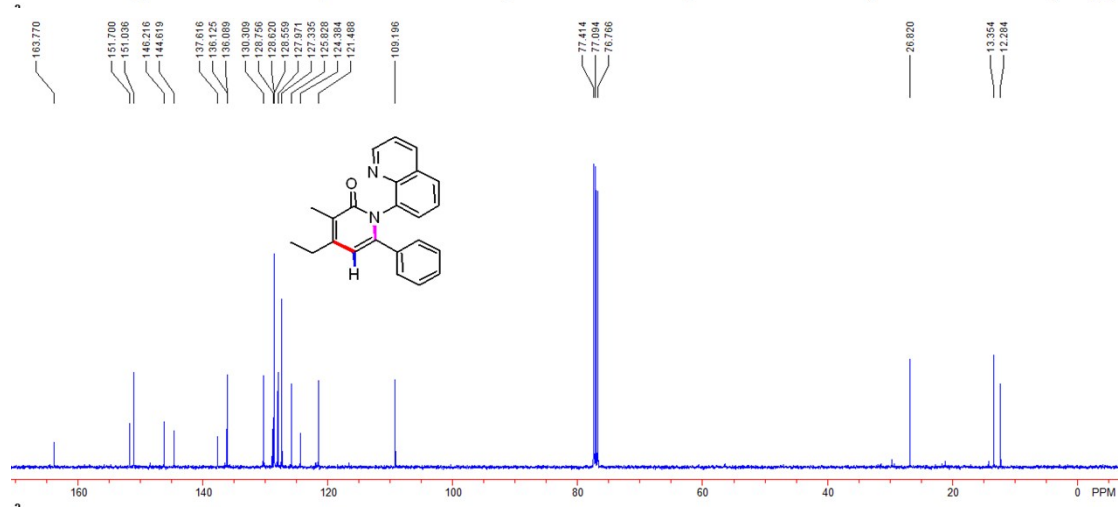

# 3-methyl-4,6-diphenyl-1-(quinolin-8-yl)pyridin-2(1H)-one

(6d)

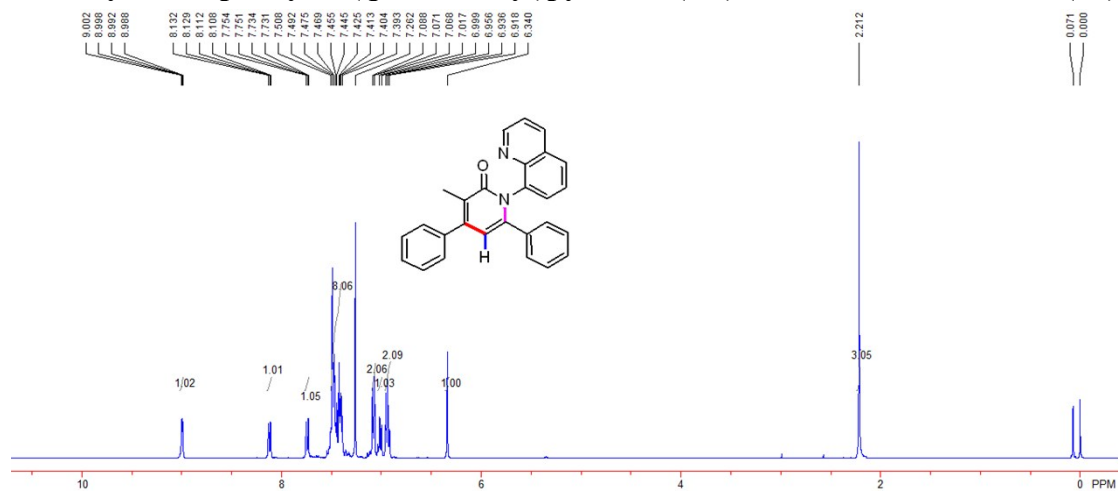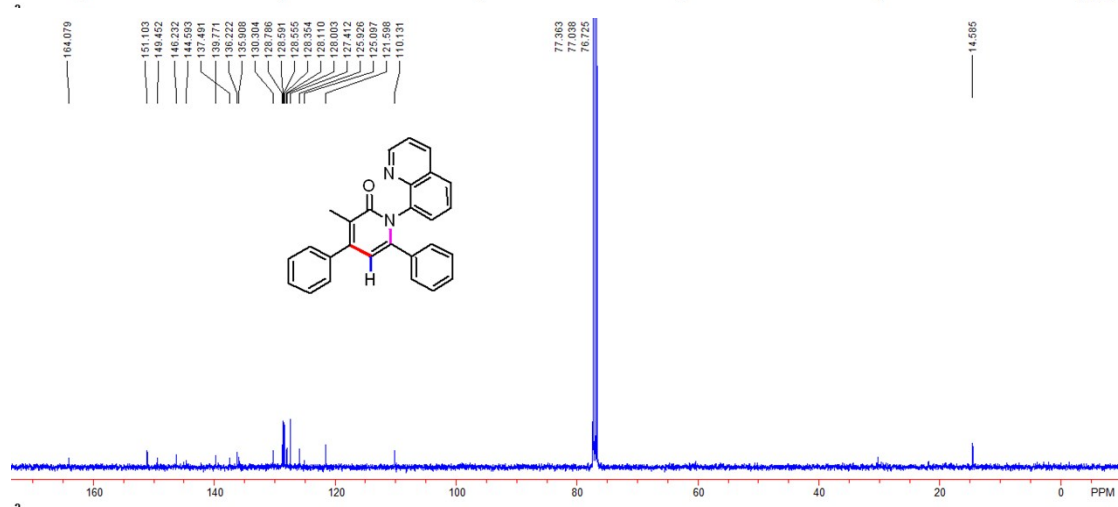



### 3-(2-chlorophenyl)-6-phenyl-1-(quinolin-8-yl)pyridin-2(1H)-one (6e)

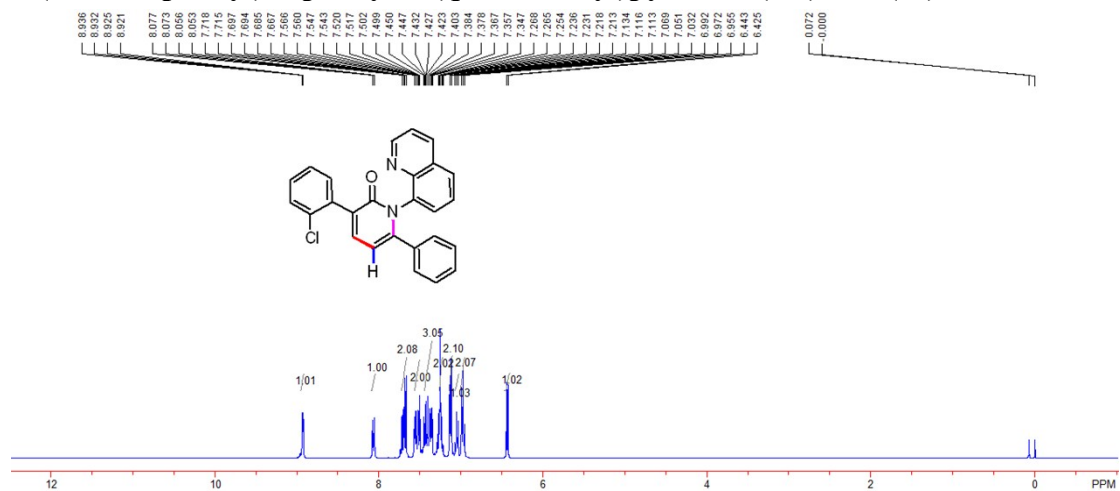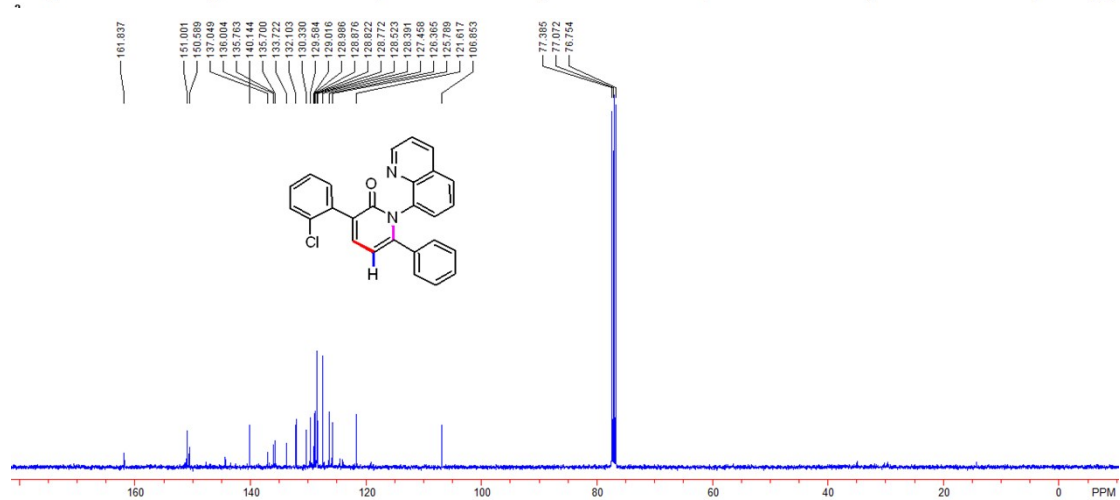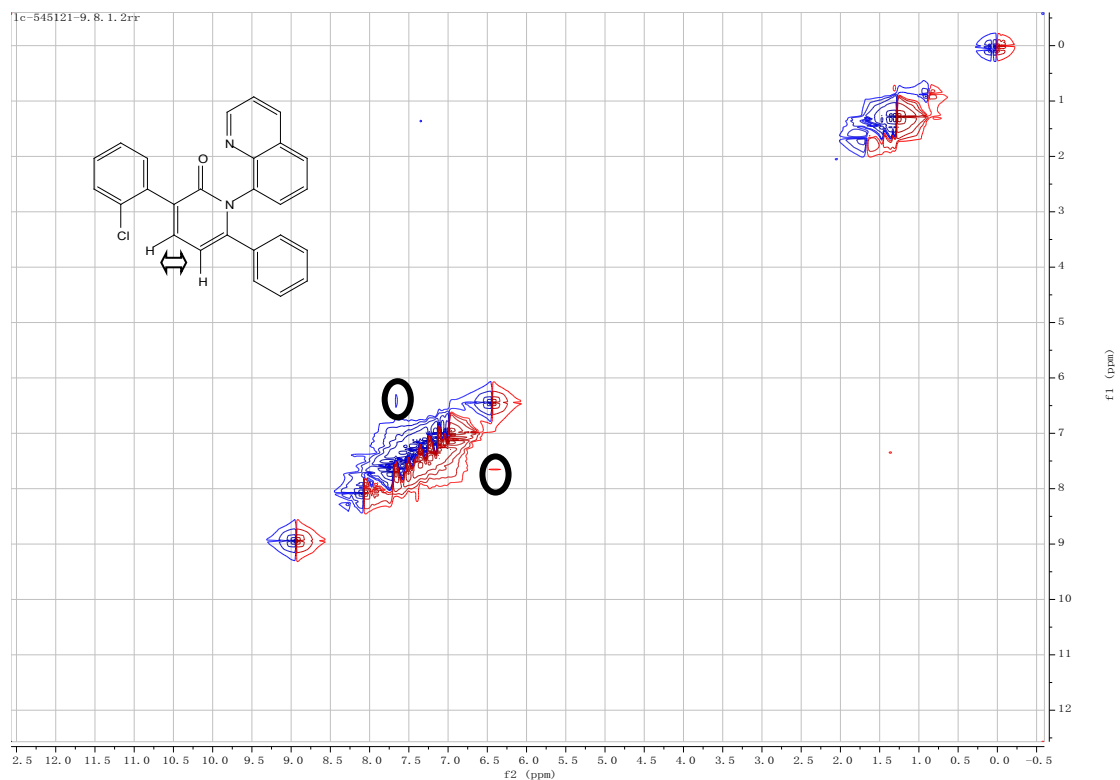

### 3-(3-chlorophenyl)-6-phenyl-1-(quinolin-8-yl)pyridin-2(1H)-one (6f)

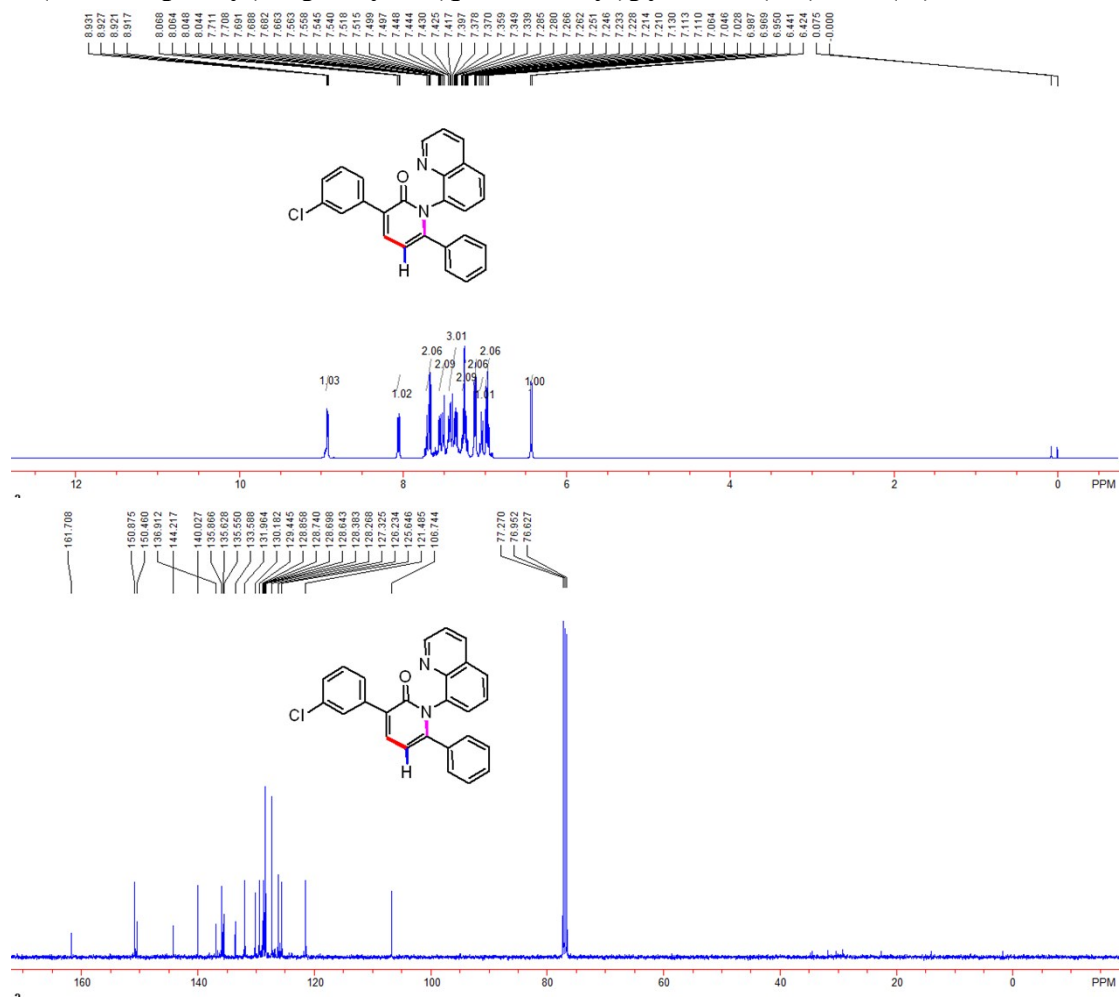

### 3-(4-chlorophenyl)-6-phenyl-1-(quinolin-8-yl)pyridin-2(1H)-one (6g)

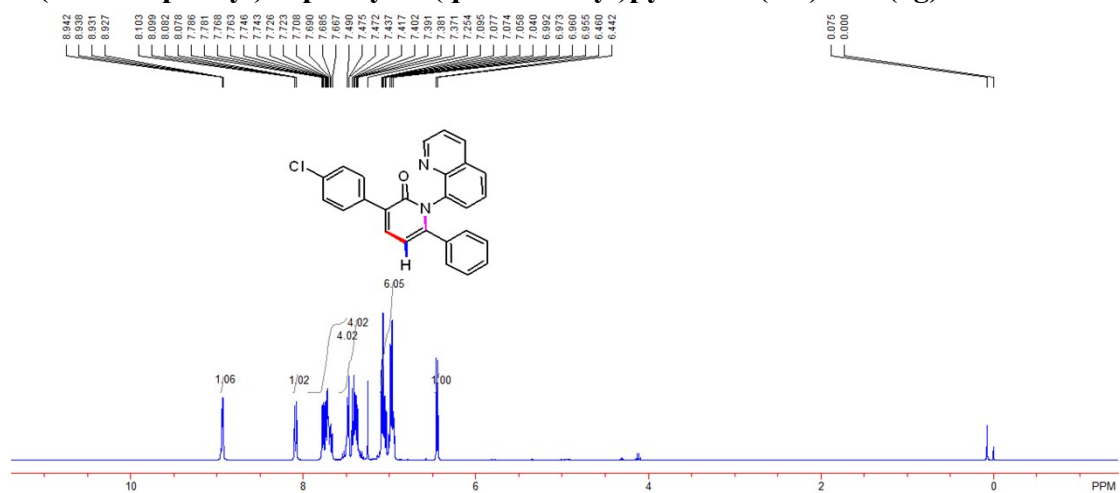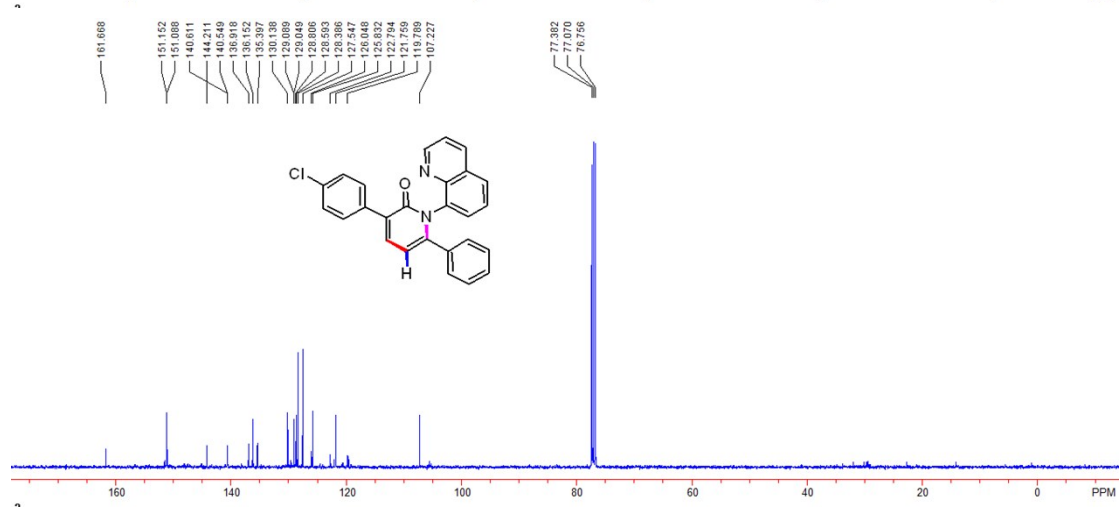

# 4,6-diphenyl-1-(quinolin-8-yl)pyridin-2(1H)-one (6h)

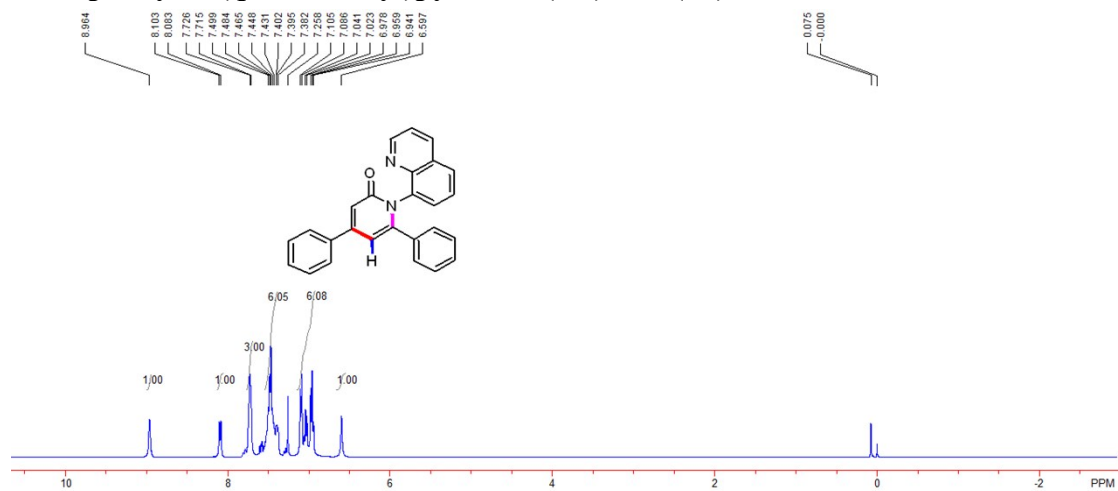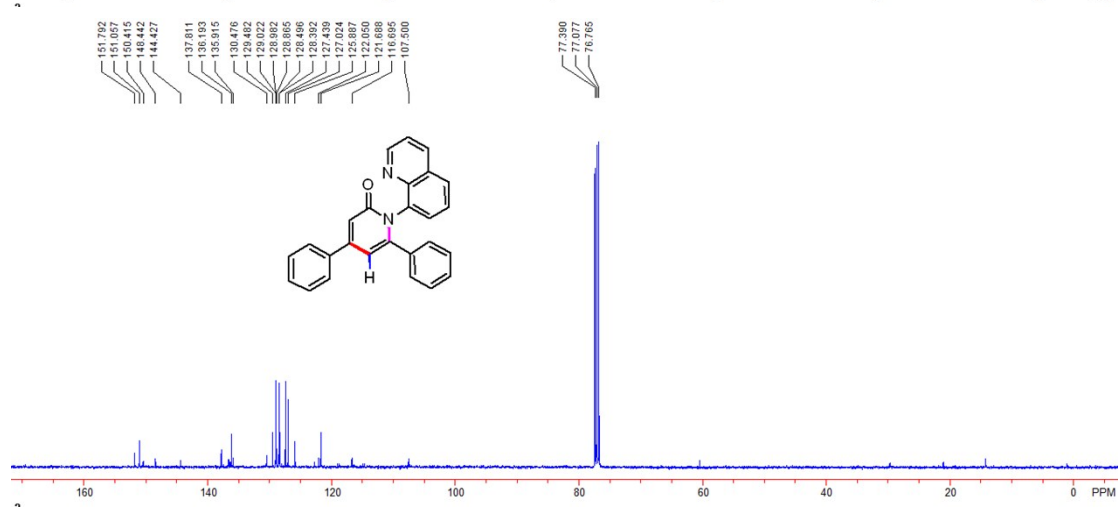

# 3,6-diphenyl-1-(quinolin-8-yl)pyridin-2(1H)-one (6i)

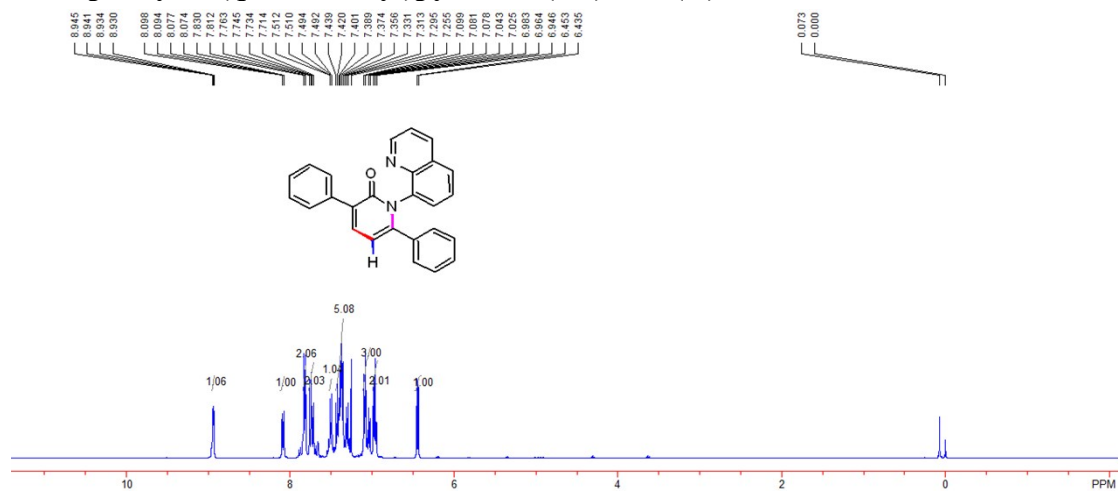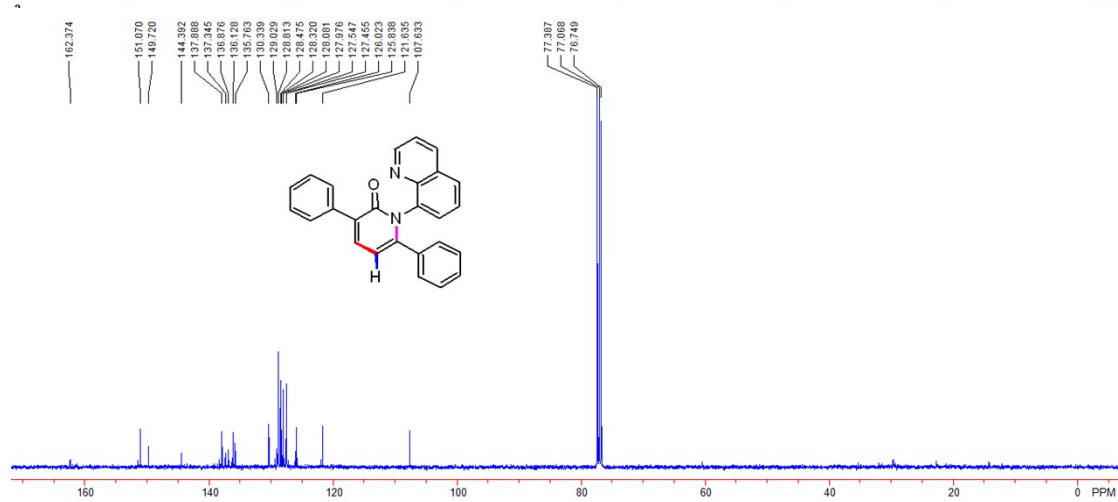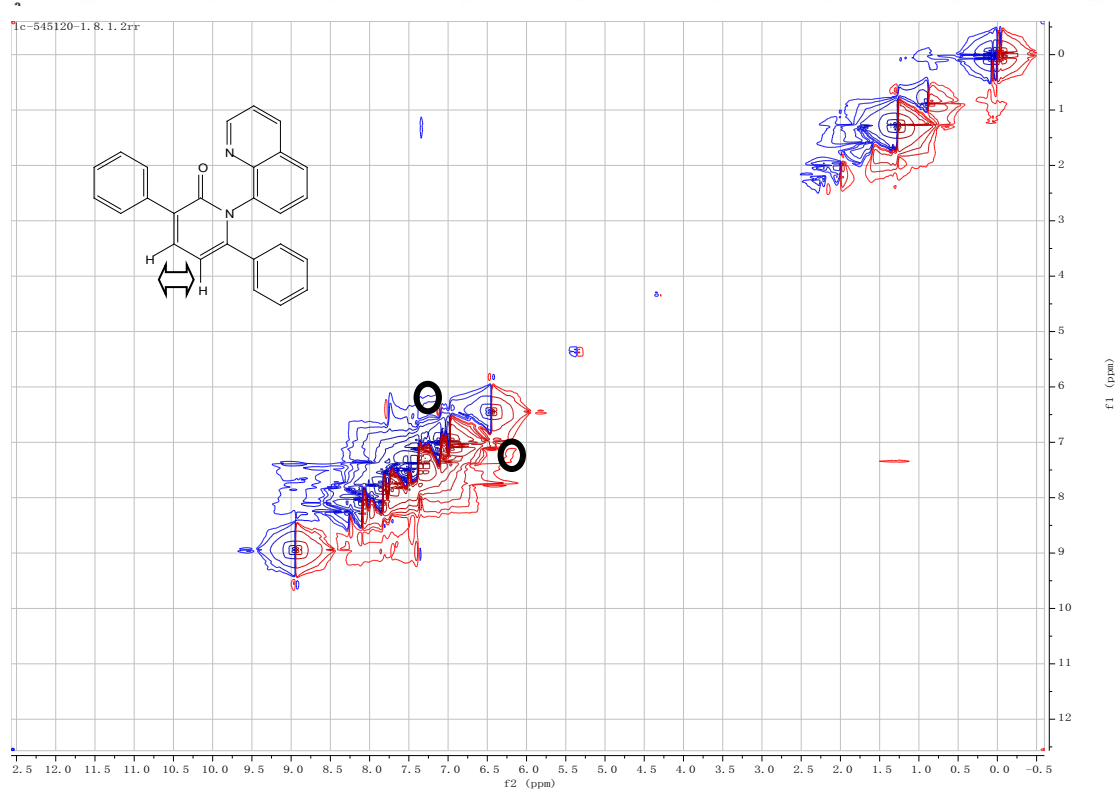

# 3-methyl-6-phenyl-1-(quinolin-8-yl)pyridin-2(1H)-one

(6j)

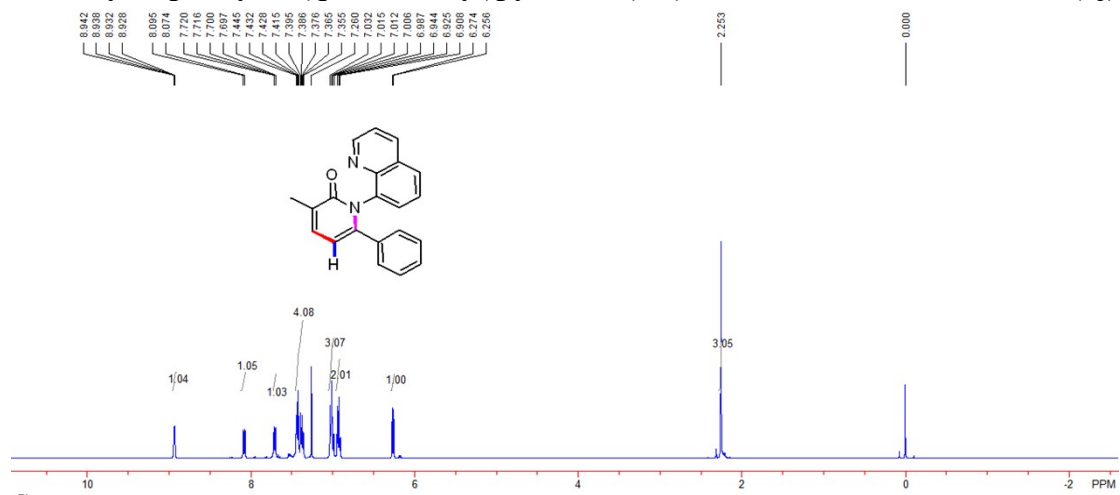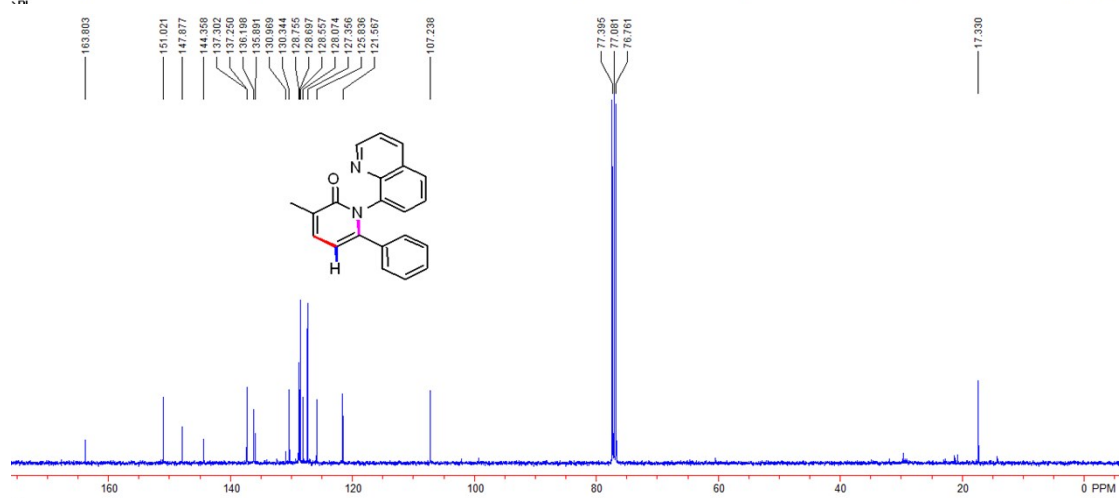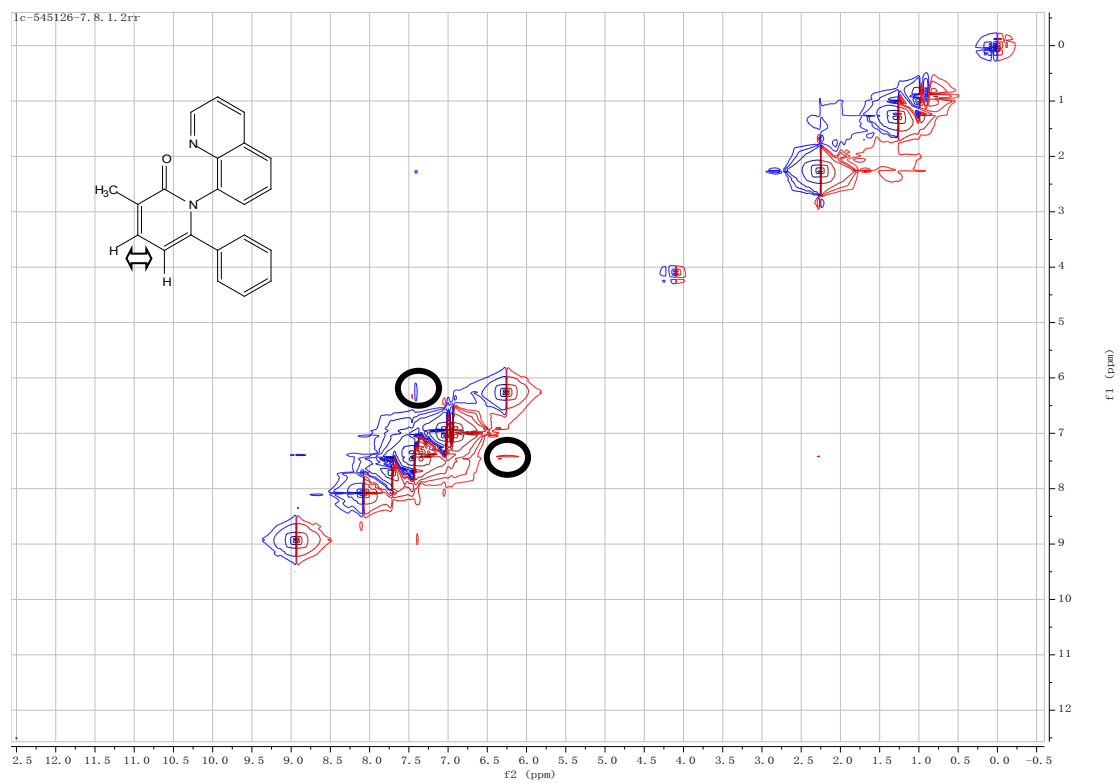

### 3-phenyl-2-(quinolin-8-yl)-4-(trimethylsilyl)isoquinolin-1(2H)-one (7a)

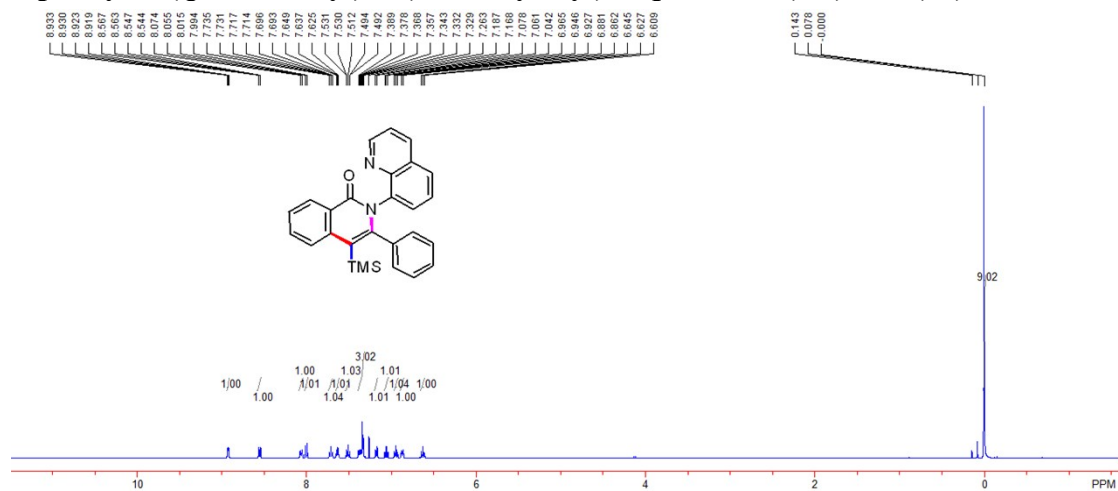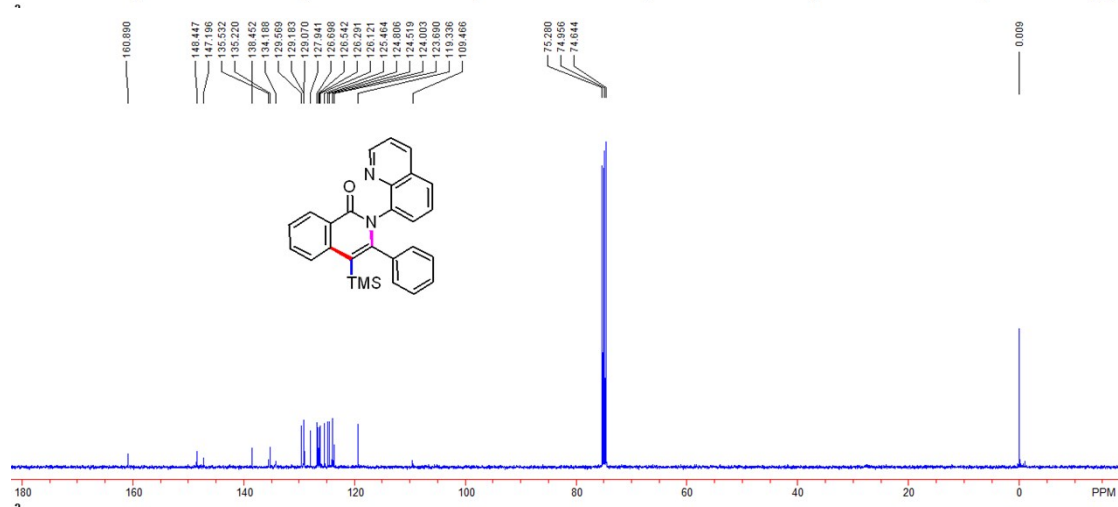

### 3-(4-bromophenyl)-2-(quinolin-8-yl)-4-(trimethylsilyl)isoquinolin-1(2H)-one (7b)

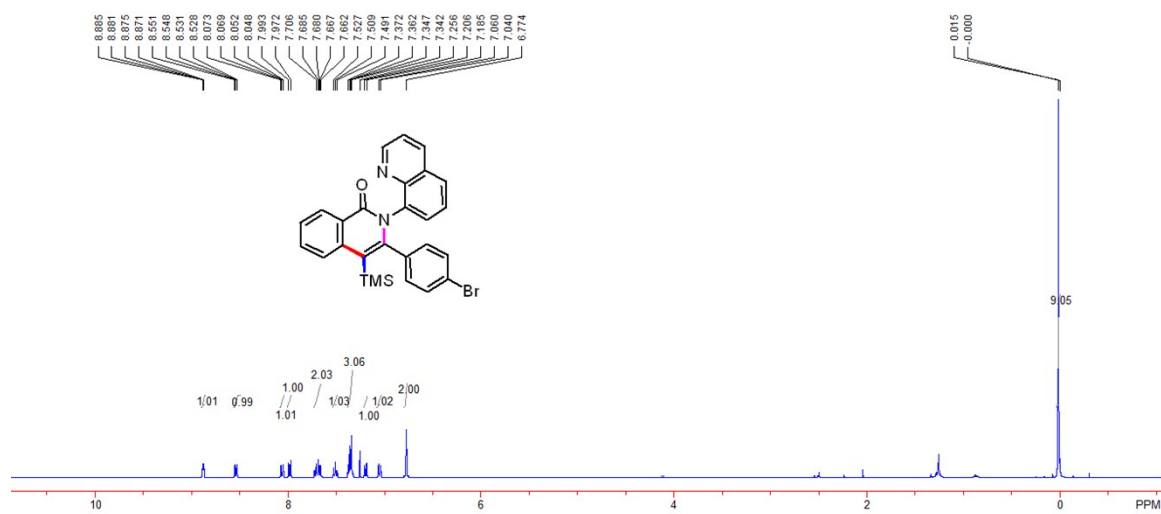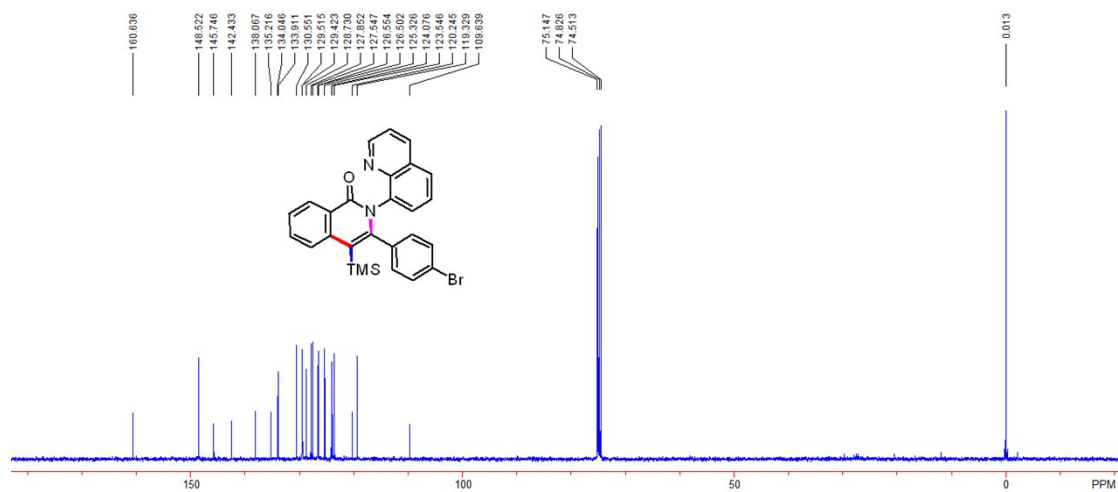



**3-(3-chlorophenyl)-2-(quinolin-8-yl)-4-(trimethylsilyl)isoquinolin-1(2H)-one (7c)**  
**4-(3-chlorophenyl)-2-(quinolin-8-yl)-3-(trimethylsilyl)isoquinolin-1(2H)-one (7c')**

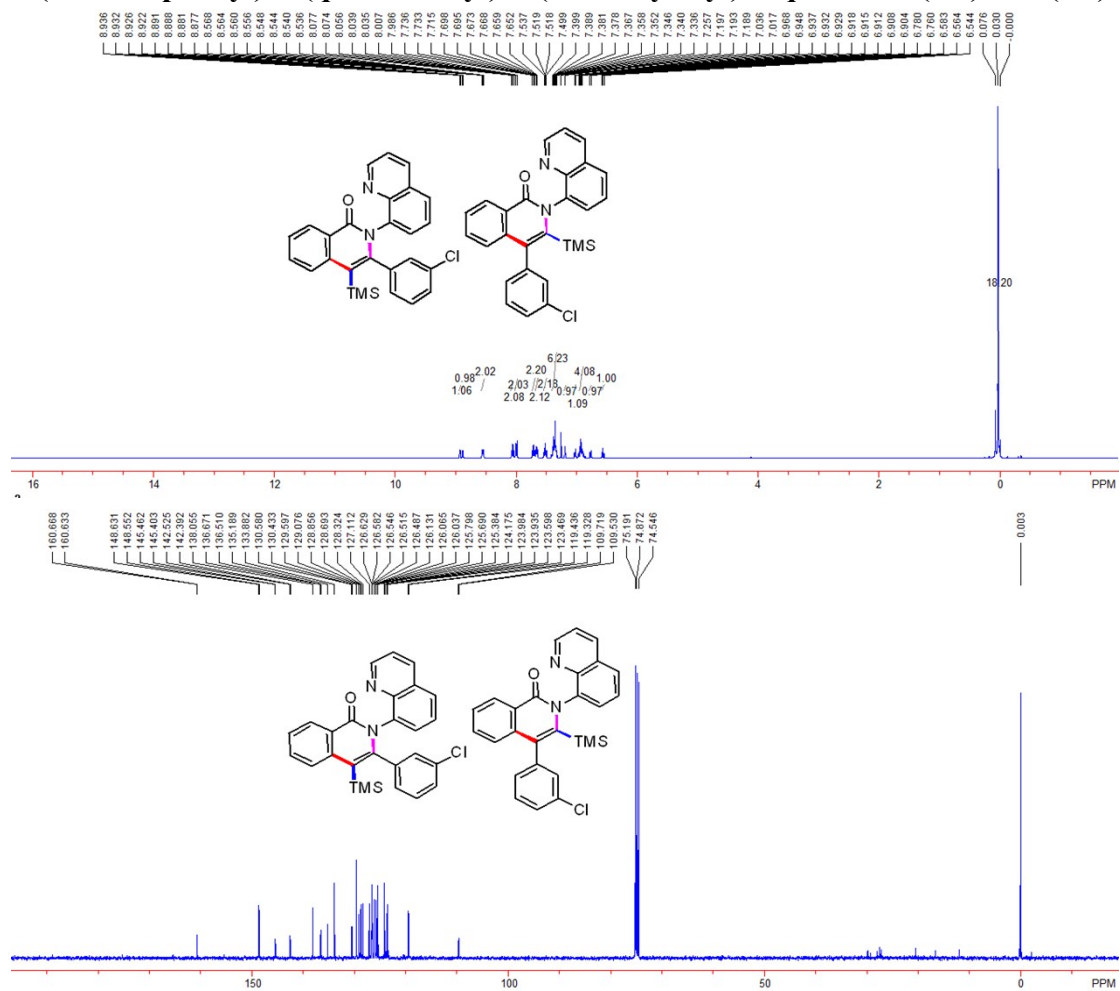

### 3-(pyridin-2-yl)-2-(quinolin-8-yl)-4-(trimethylsilyl)isoquinolin-1(2H)-one (7d)

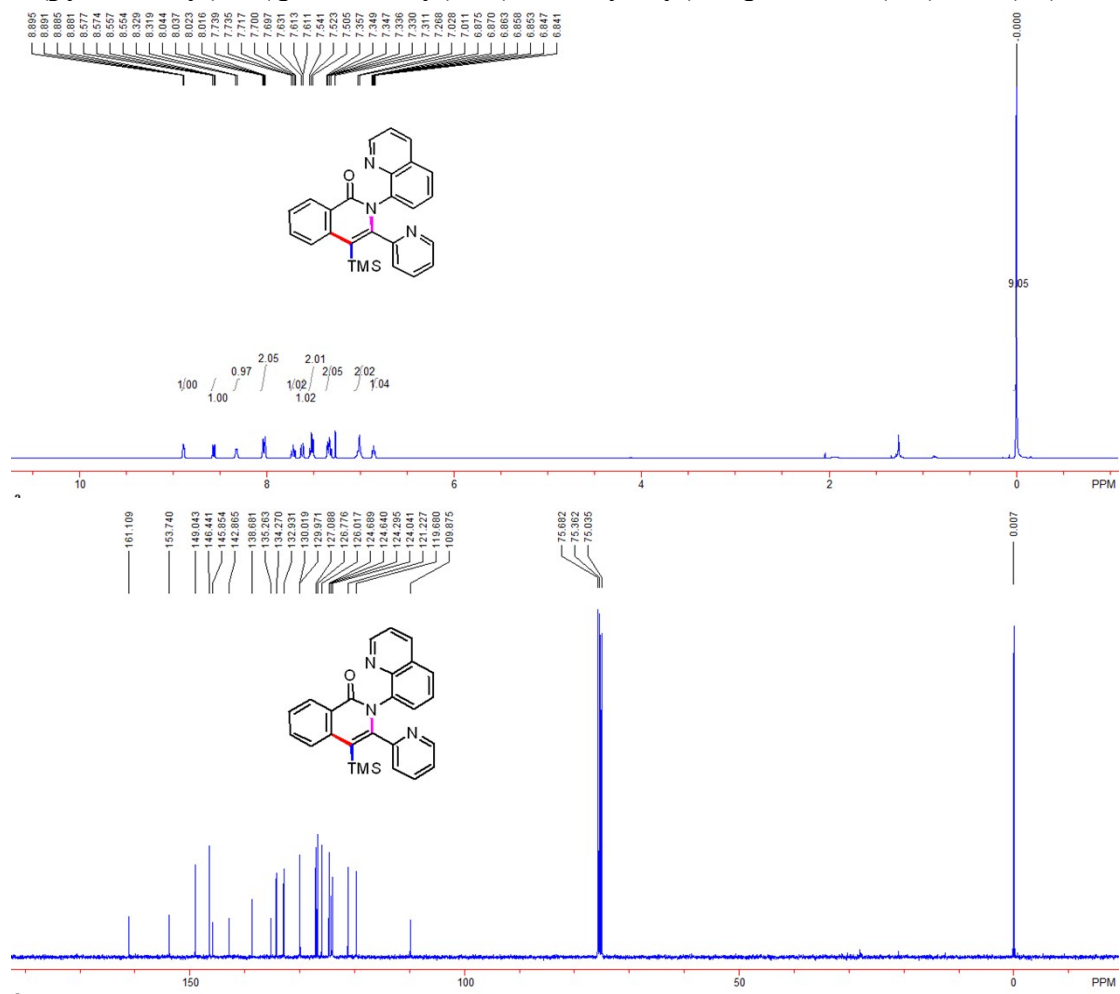



# 7-iodo-3-phenyl-2-(quinolin-8-yl)-4-(trimethylsilyl)isoquinolin-1(2H)-one (7f)

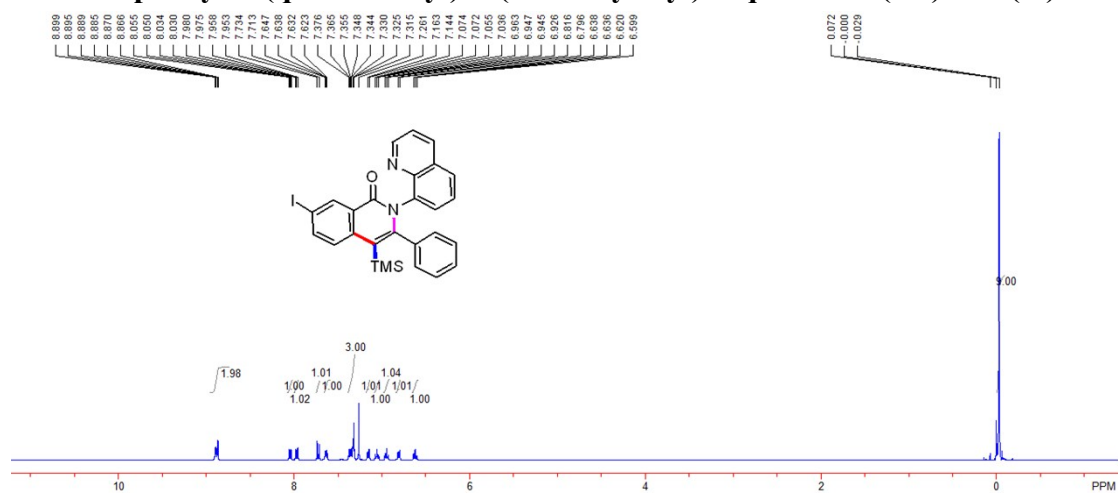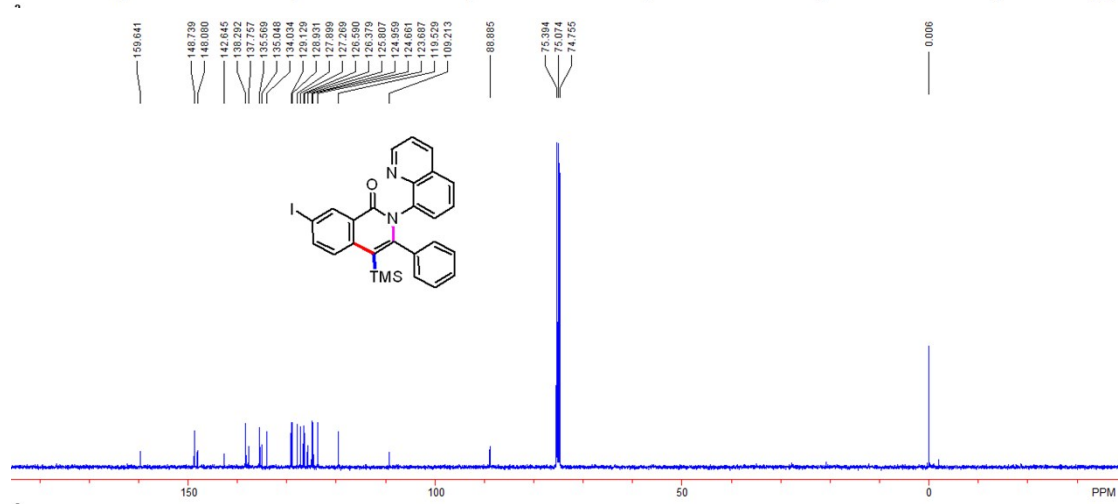

# 7-chloro-3-phenyl-2-(quinolin-8-yl)-4-(trimethylsilyl)isoquinolin-1(2H)-one (7g)

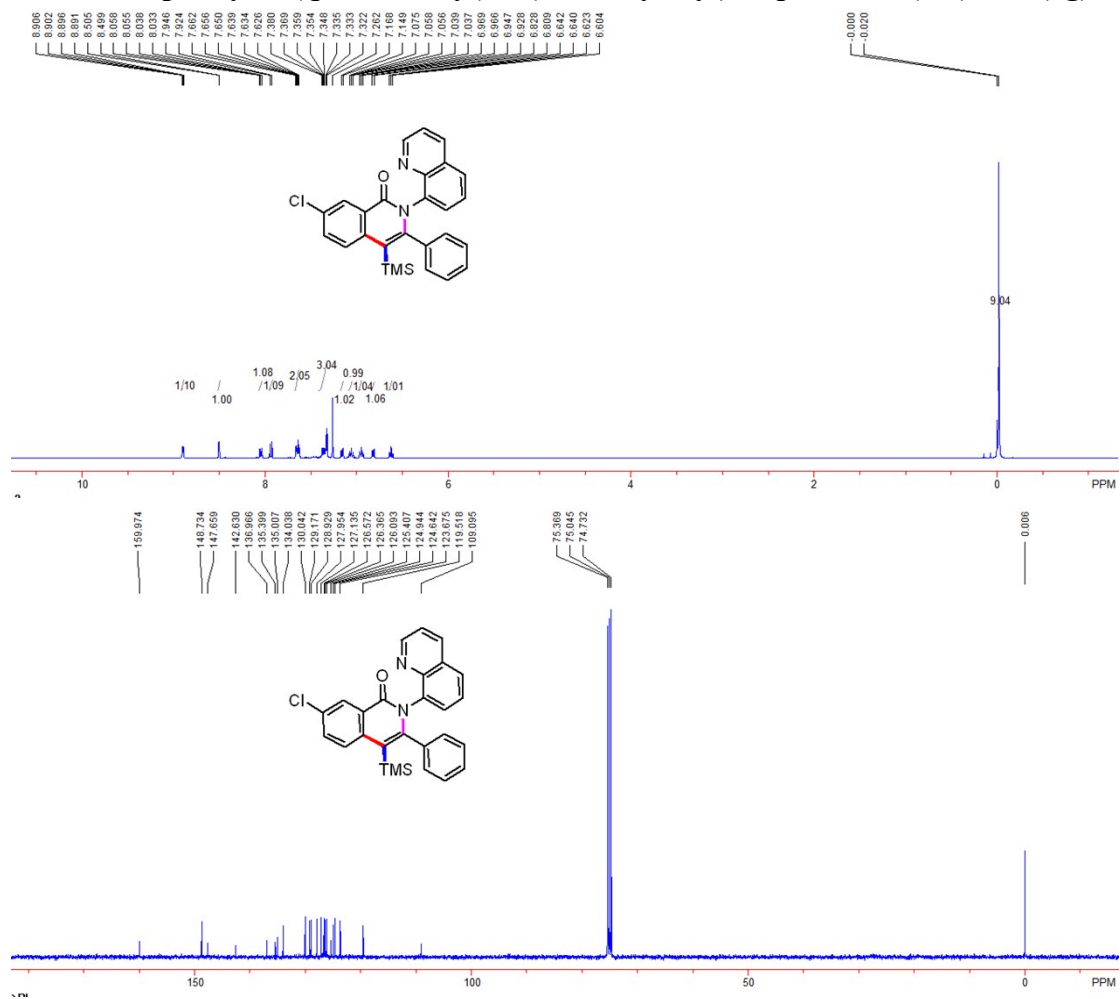

# 6-phenyl-5-(quinolin-8-yl)-7-(trimethylsilyl)thieno[3,2-c]pyridin-4(5H)-one (7h)

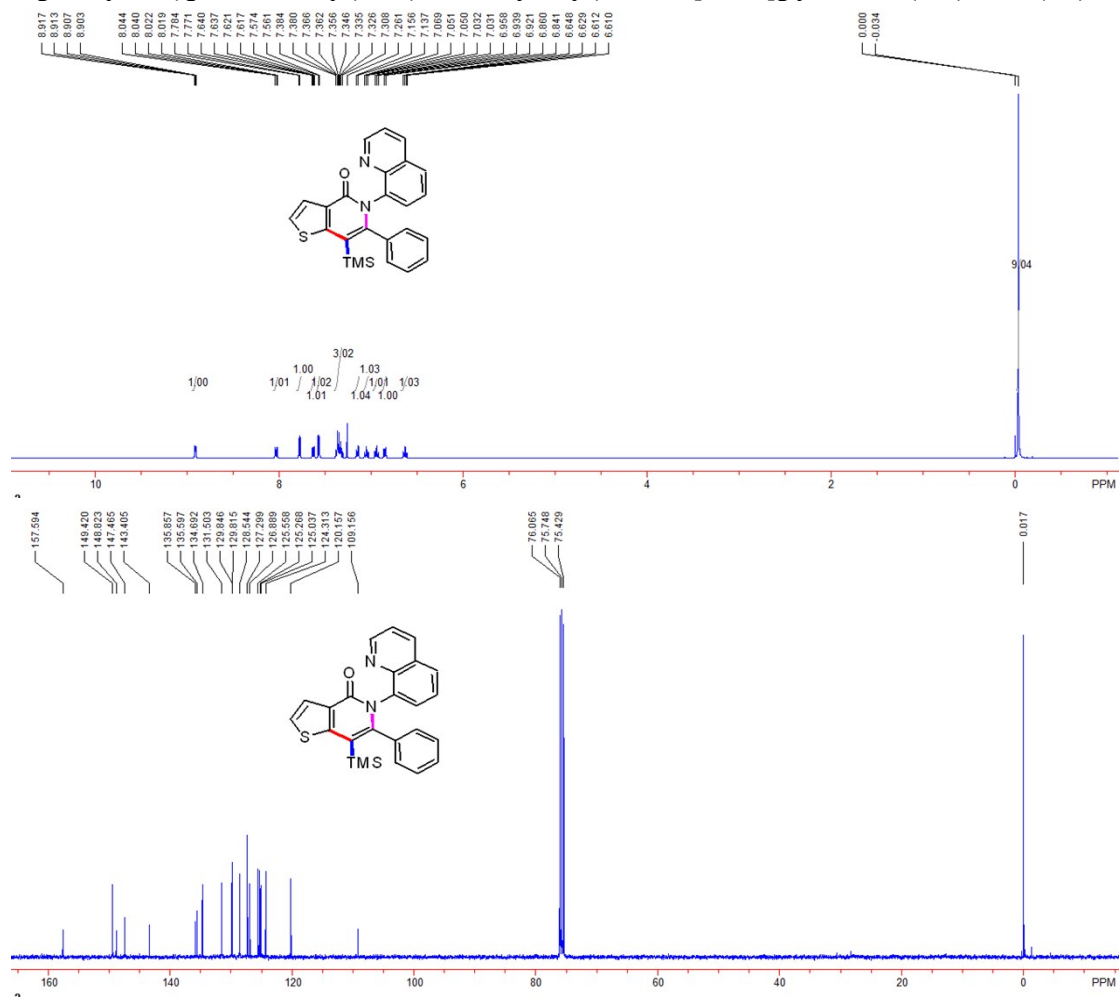

### 3-methyl-6-phenyl-1-(quinolin-8-yl)-5-(trimethylsilyl)pyridin-2(1H)-one (7i)

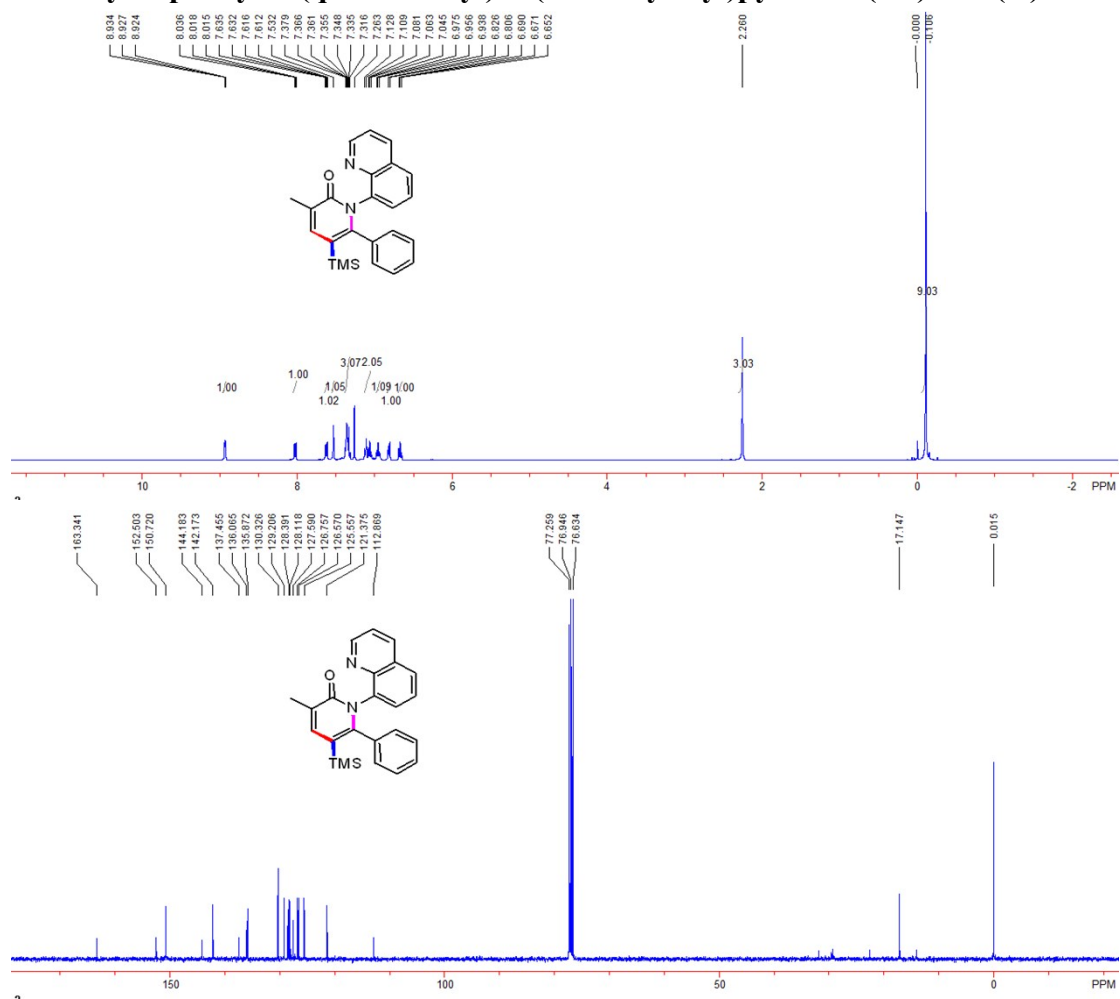

### 3-methyl-4,6-diphenyl-1-(quinolin-8-yl)-5-(trimethylsilyl)pyridin-2(1H)-one (7j)

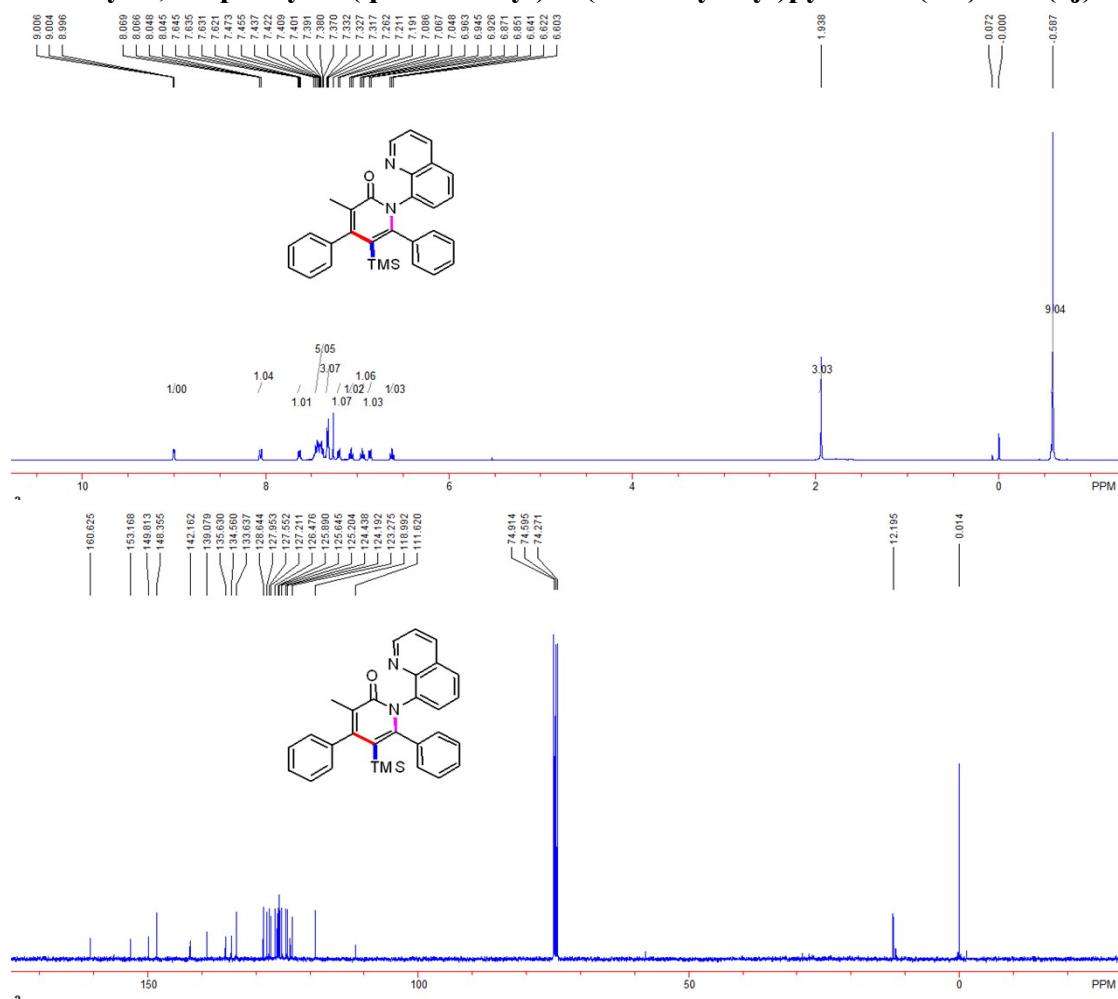

Supplement: c9ra06963a1.pdf [file c9ra06963a1.pdf]
